# Supplementary material for: Purpurogemutantin and Purpurogemutantidin, New Drimenyl Cyclohexenone Derivatives Produced by a Mutant Obtained by Diethyl Sulfate Mutagenesis of a Marine-Derived Penicillium purpurogenum G59
Source: MDPI journal article supplement (doi:10.3390/md10061266), 2012-06-04

# Supplementary Materials

## Supplementary Data S4. HPLC Analysis for 1–3 and the G59 and BD-1-6 Extracts

### Contents

| Content                                                                                     | Page |
|---------------------------------------------------------------------------------------------|------|
| 1. Conditions for the HPLC analysis                                                         | 1    |
| 2. HPLC profiles detected at 210 nm                                                         | 2    |
| UV absorption curves of 1–3 and the BD-1-6 and G59 extracts at the indicated $t_R$          | 2    |
| UV absorption curves of the peaks in HPLC profiles of BD-1-6 and G59 at the indicated $t_R$ | 3    |
| 3. HPLC profiles detected at 236 nm                                                         | 5    |
| 4. HPLC profiles detected at 254 nm                                                         | 7    |
| 5. HPLC profiles detected at 300 nm                                                         | 7    |
| 6. HPLC profiles detected at 327 nm                                                         | 8    |

### 1. Conditions for the HPLC analysis

The HPLC analysis was performed using a Waters HPLC equipment using Waters 600 controller, Waters 600 pump, Waters 2414 refractive index detector, Waters 2996 photodiode array detector and Waters Empower™ software.

The EtOAc extracts of G59 and BD-1-6 cultures and the compounds 1–3 were dissolved in MeOH to prepare a 10 mg/ml sample solution for HPLC analysis. HPLC analysis of the samples was carried out on a Venusil MP C18 column (5  $\mu$ m, 100 Å, 4.6 mm  $\times$  250 mm; Agela Technologies) using the same Waters HPLC equipment mentioned. Each 5  $\mu$ l of sample solutions was injected into the column after filtration by a 0.22  $\mu$ m pore membrane filter. Then, the elution was performed using MeOH–H<sub>2</sub>O in linear gradient (20% MeOH at initial time 0 min  $\rightarrow$  100% MeOH at 60 min  $\rightarrow$  100% MeOH at 90 min; flow rate, 1 ml/min). The acquired photodiode array (PDA) data were processed by Empower PDA software to obtain targeted HPLC data.

## 2. HPLC profiles detected at 210 nm

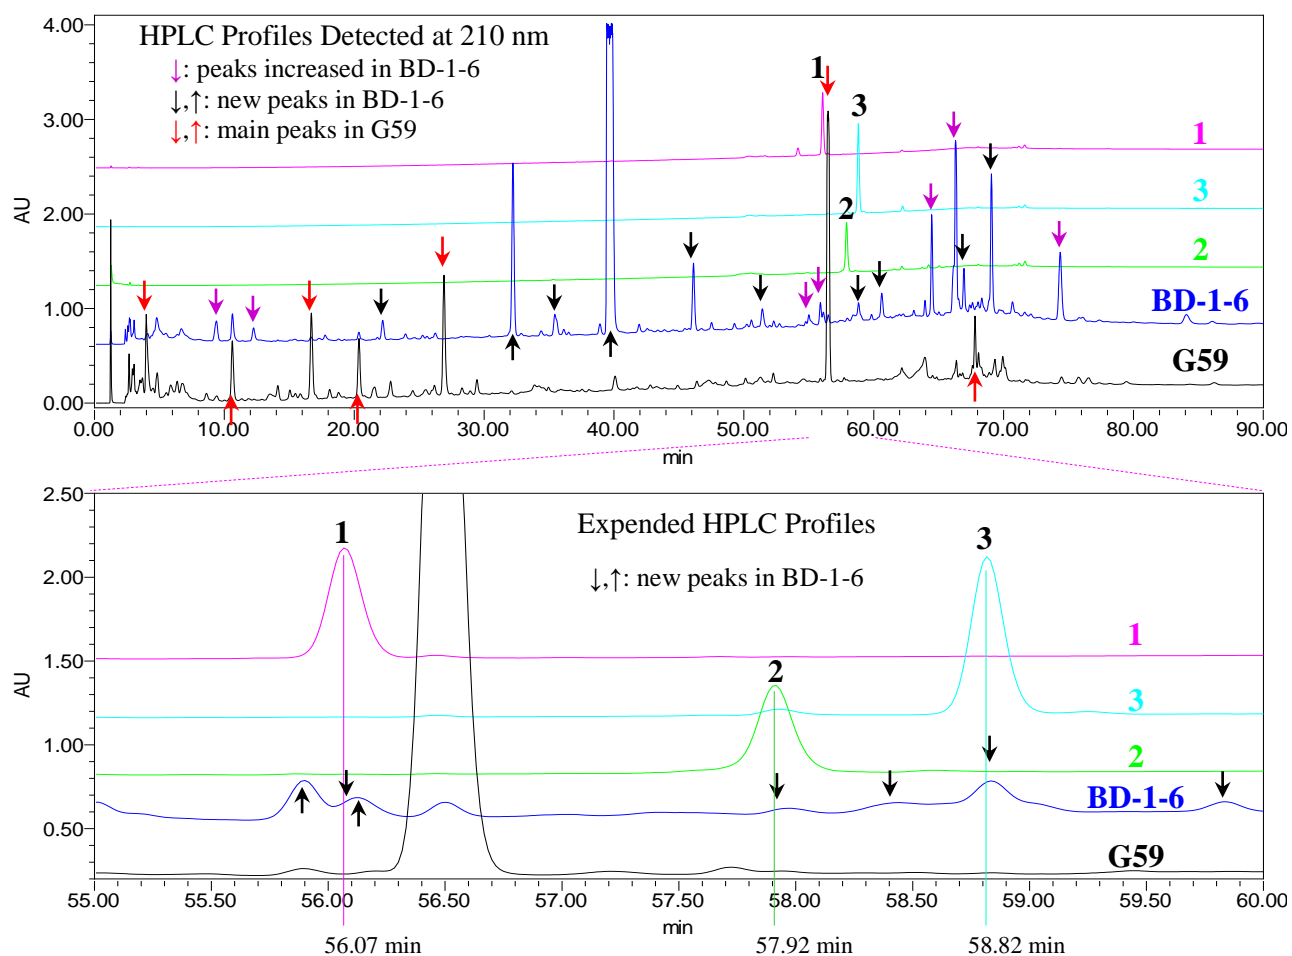

UV absorption curves of **1–3** and the BD-1-6 and G59 extracts at the indicated  $t_R$

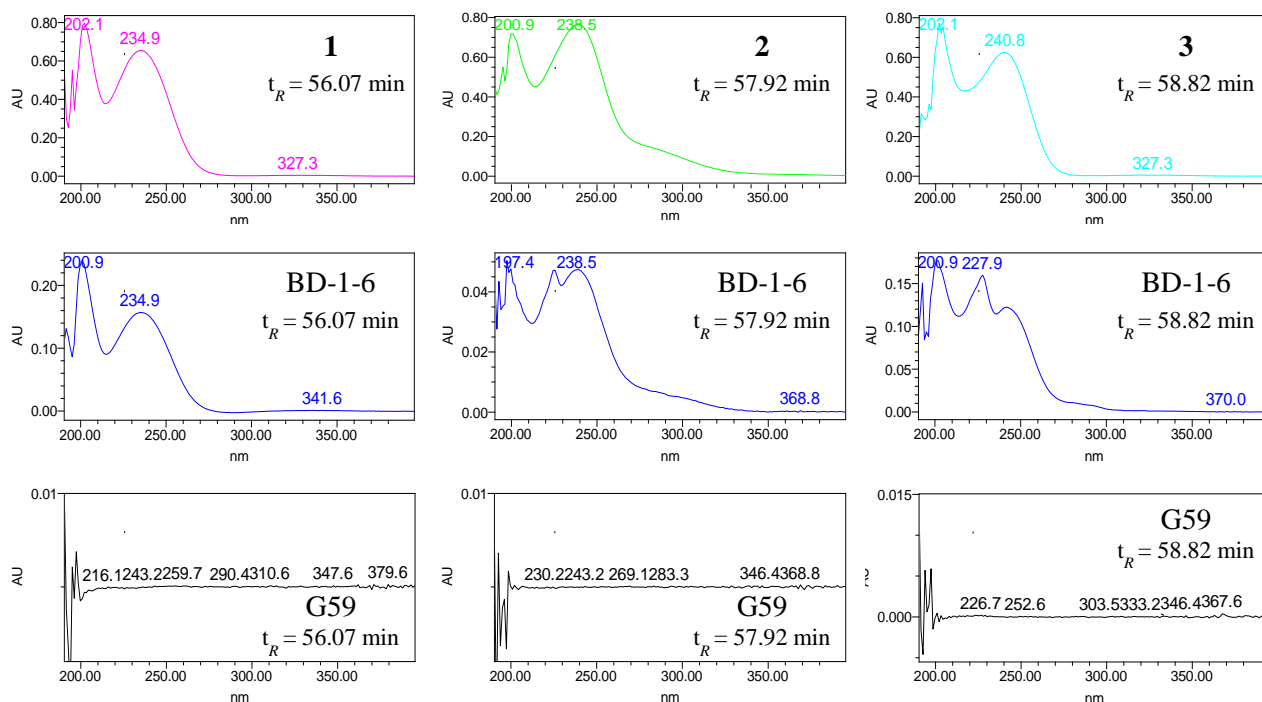

# UV absorption curves of the peaks in HPLC profiles of BD-1-6 and G59 at the indicated $t_R$

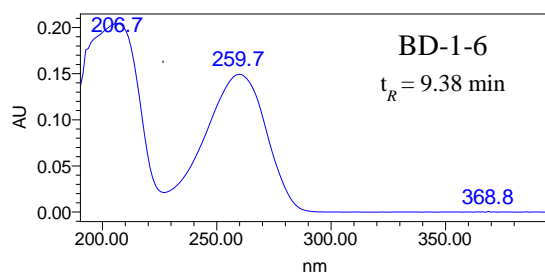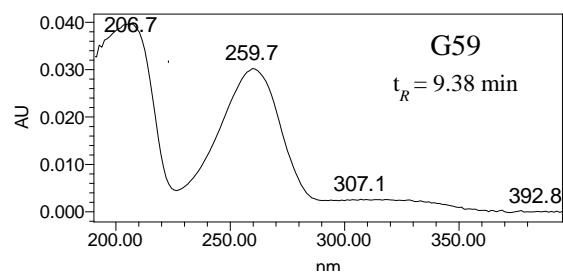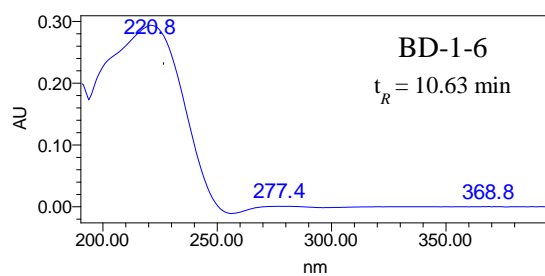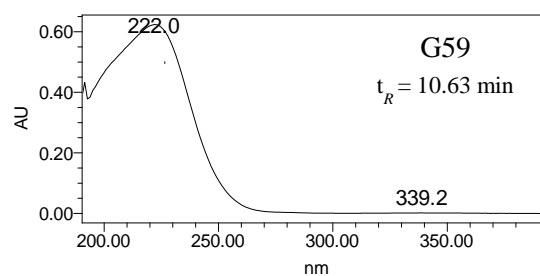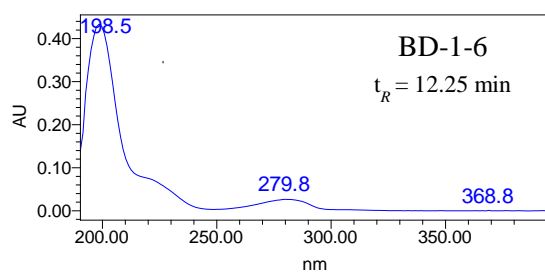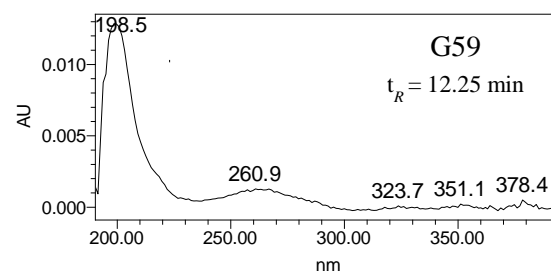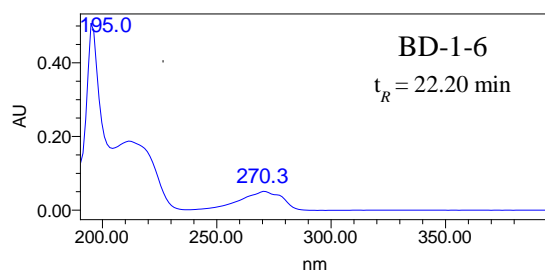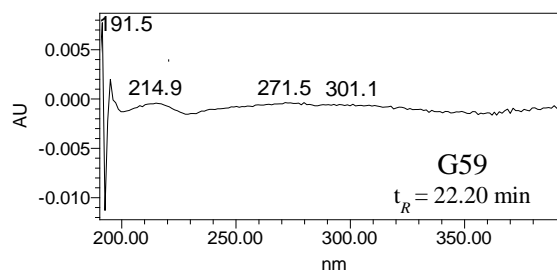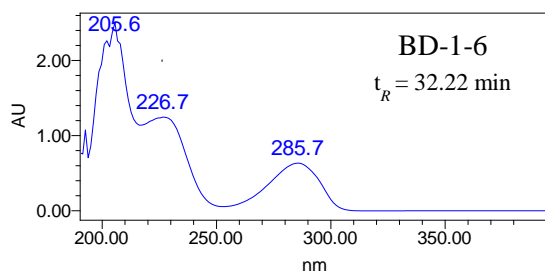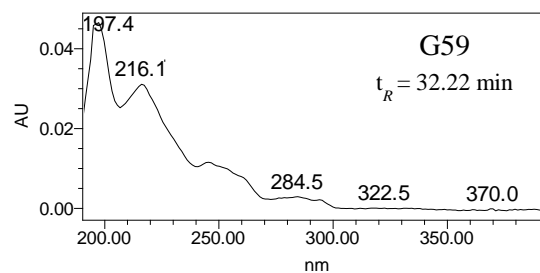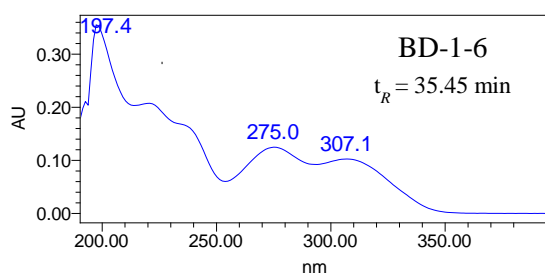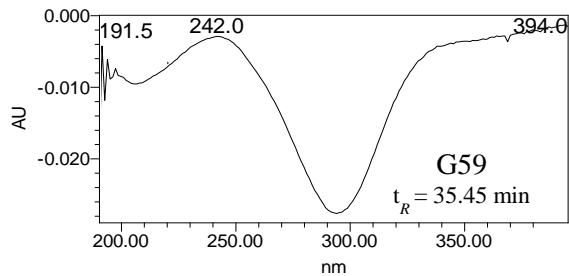

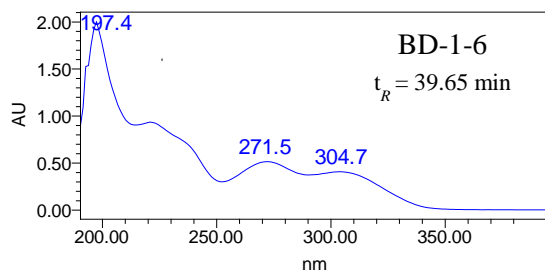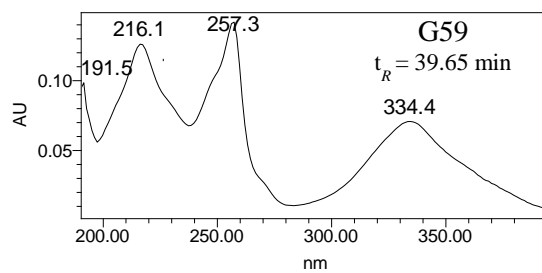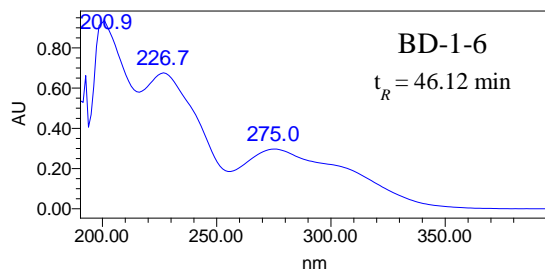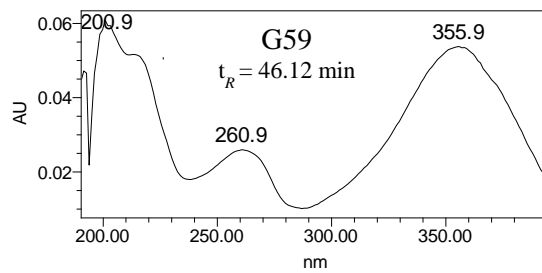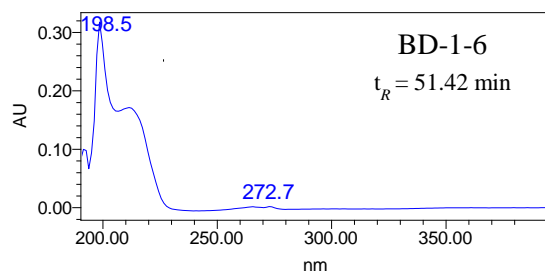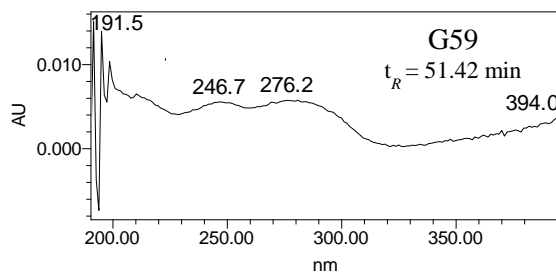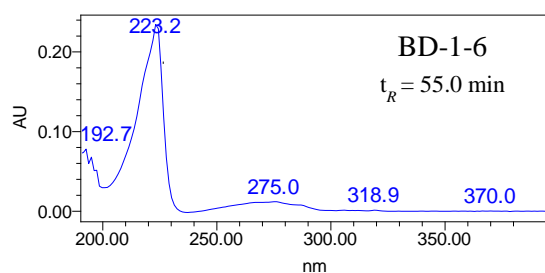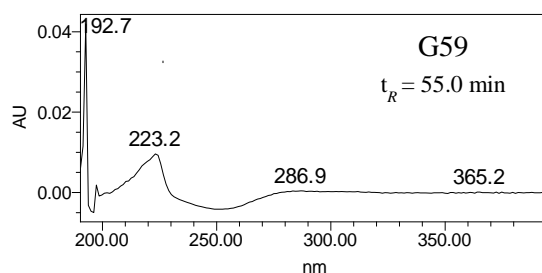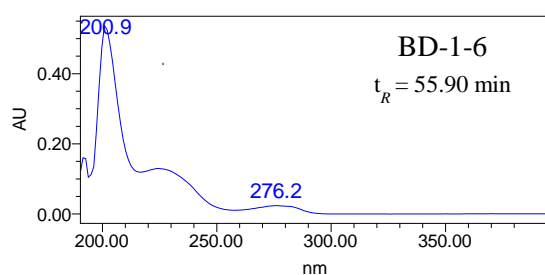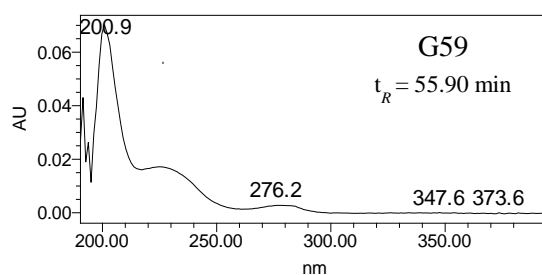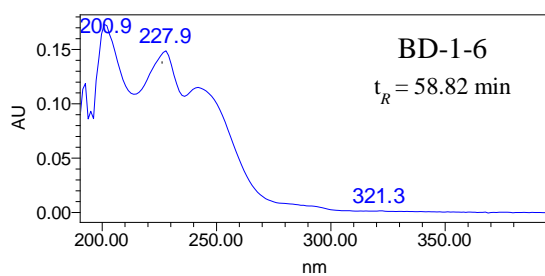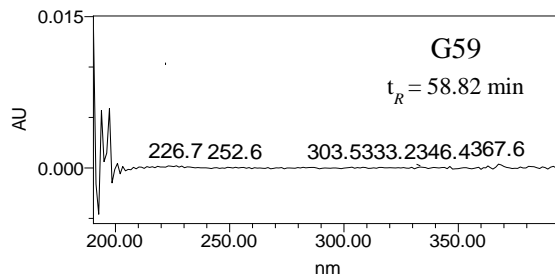

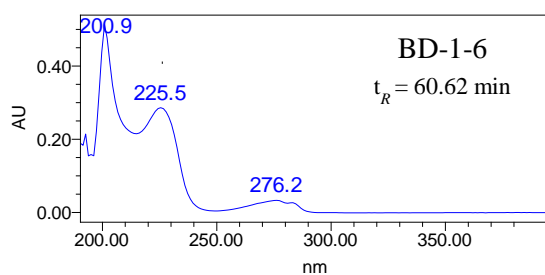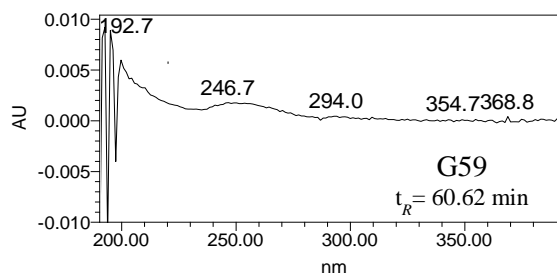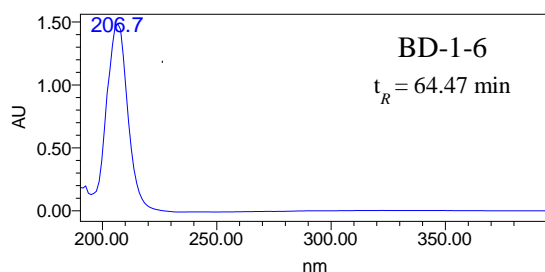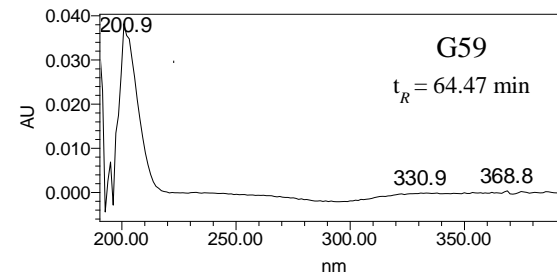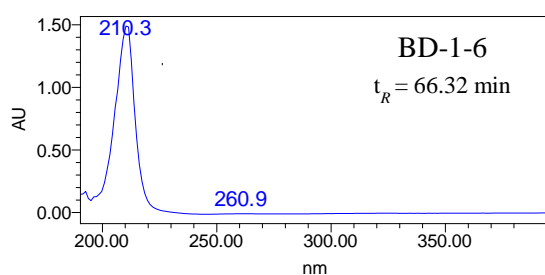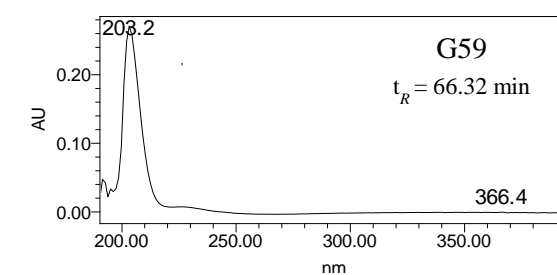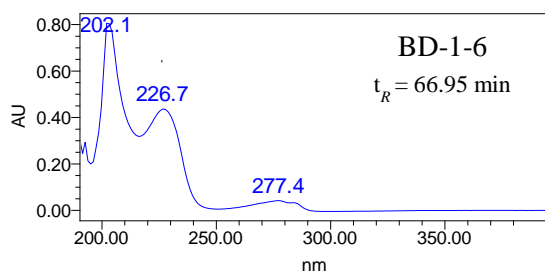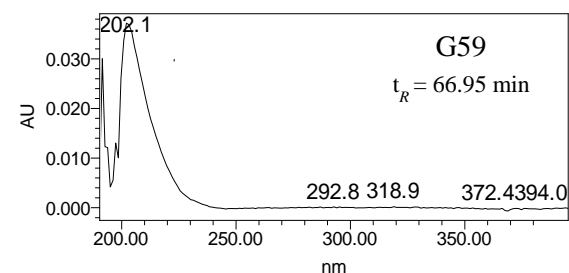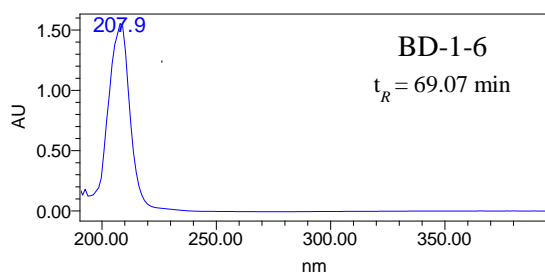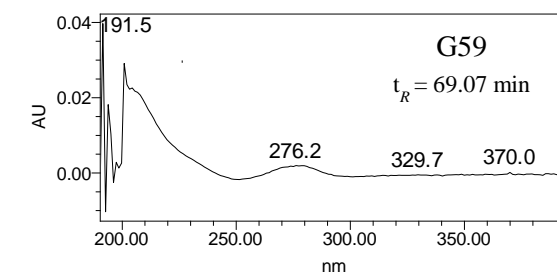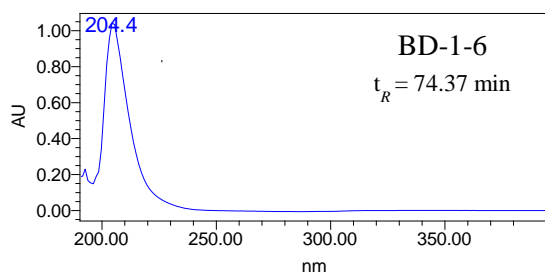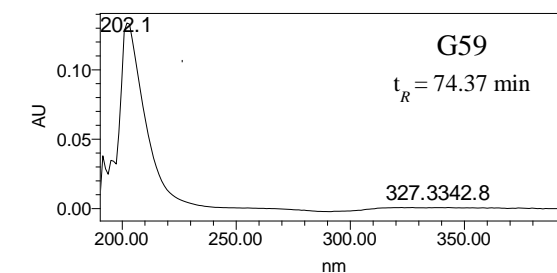

### 3. HPLC profiles detected at 236 nm

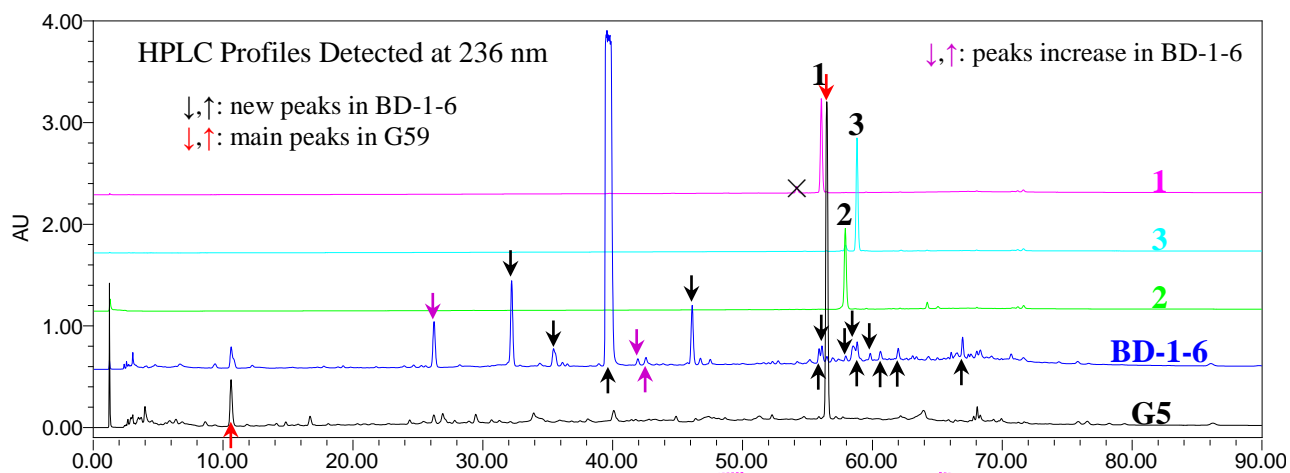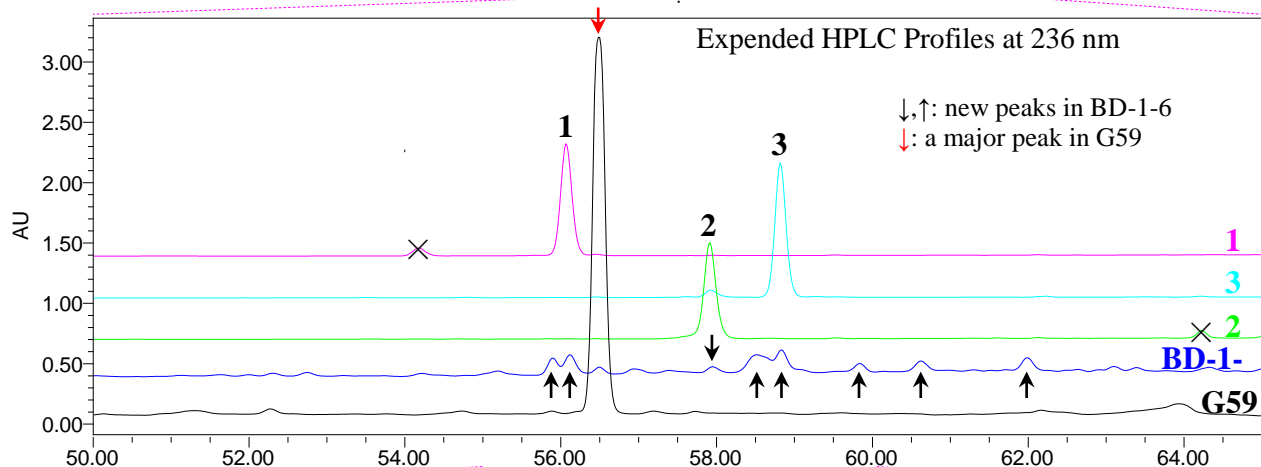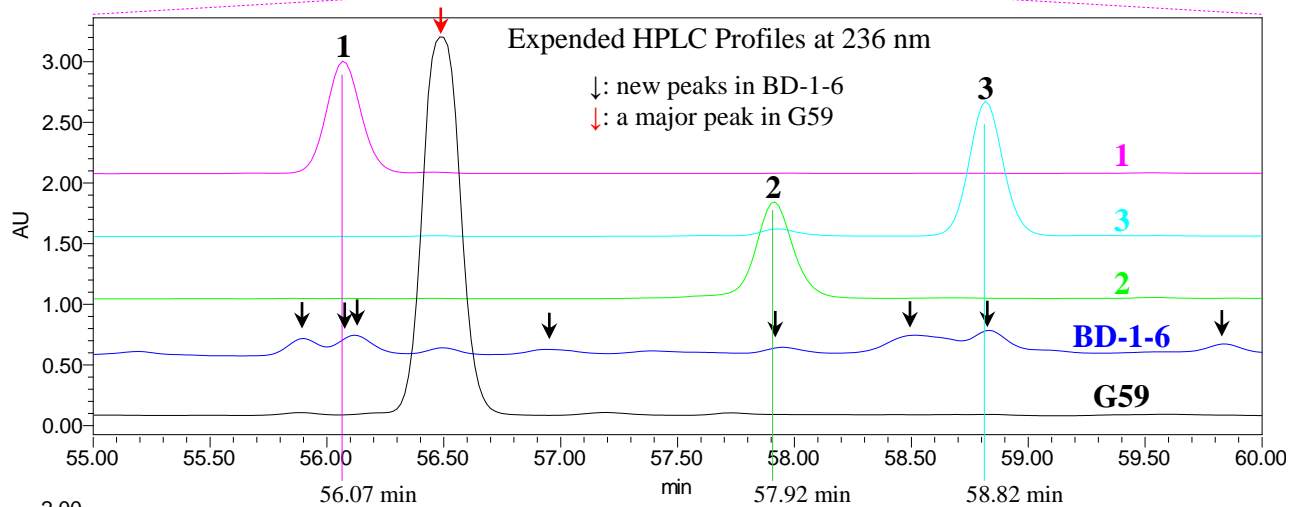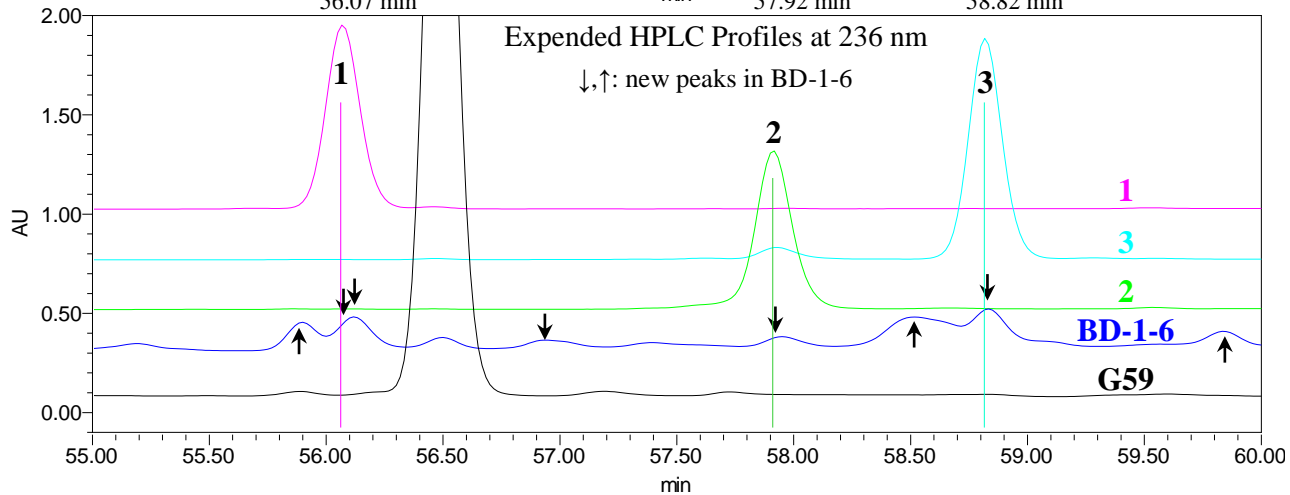

#### 4. HPLC profiles detected at 254 nm

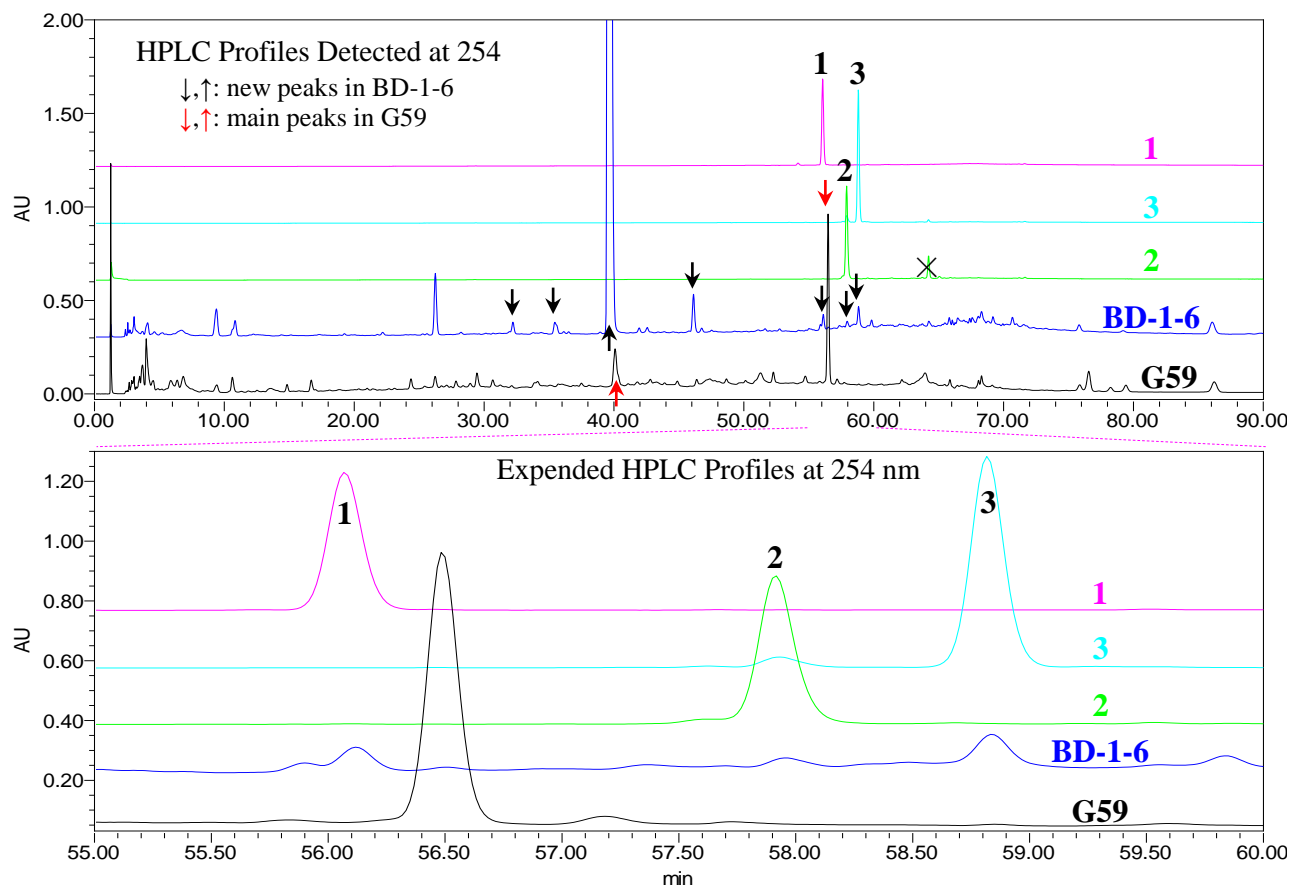

#### 4. HPLC profiles detected at 300 nm

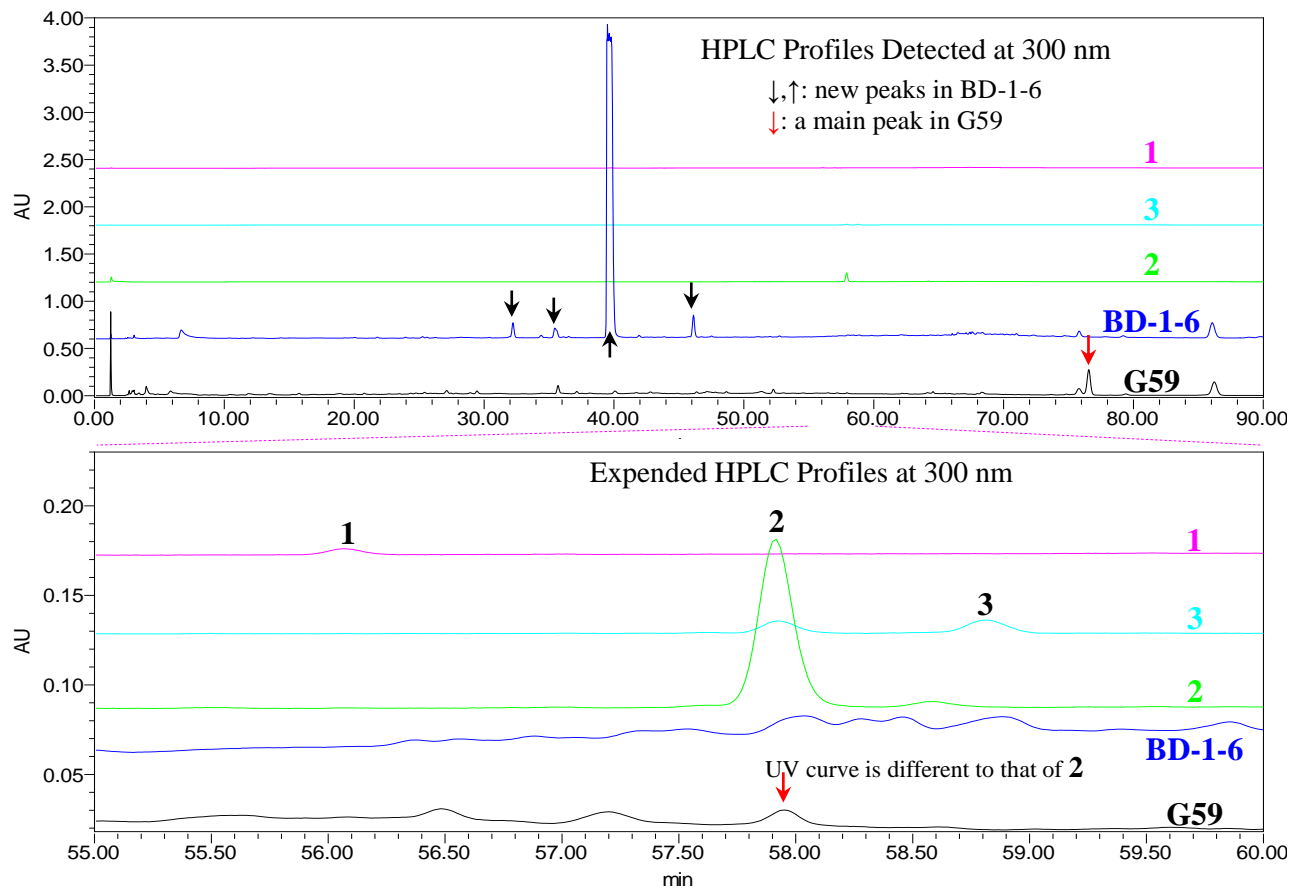

#### 4. HPLC profiles detected at 327 nm

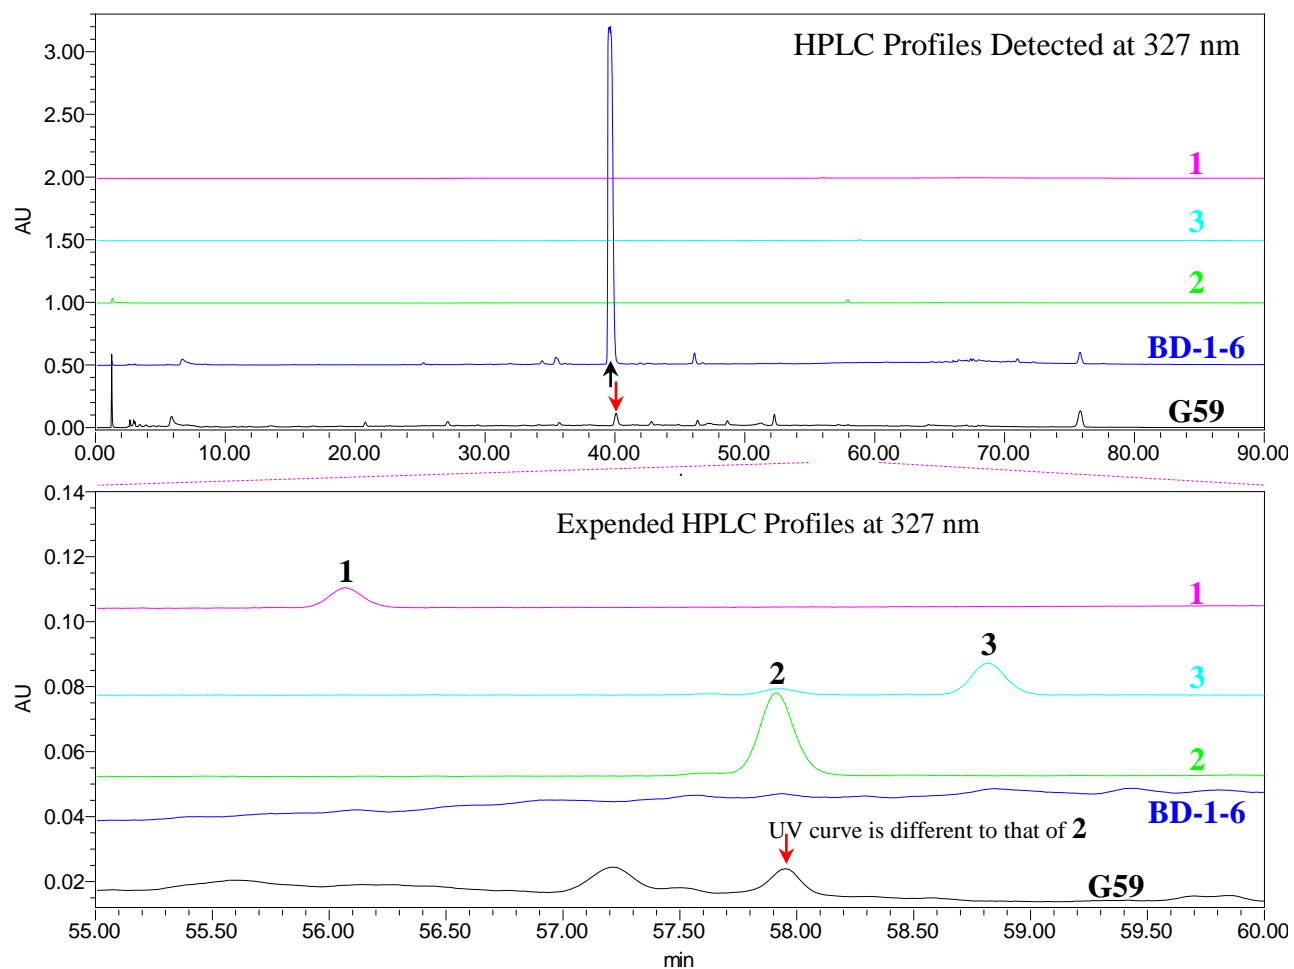

Supplement: s1 [file s1]
