# Supplementary material for: Purpurogemutantin and Purpurogemutantidin, New Drimenyl Cyclohexenone Derivatives Produced by a Mutant Obtained by Diethyl Sulfate Mutagenesis of a Marine-Derived Penicillium purpurogenum G59
Source: MDPI journal article supplement (doi:10.3390/md10061266), 2012-06-04

## Supplementary Materials

### Supplementary Data S1. MS, UV, IR and NMR spectra of **1**

#### Contents

| Content                                                     | Page |
|-------------------------------------------------------------|------|
| 1. Positive and negative ESIMS spectra of <b>1</b>          | 2    |
| 2. Positive HRESIMS spectrum of <b>1</b>                    | 3    |
| 3. UV spectrum of <b>1</b>                                  | 4    |
| 4. IR spectrum of <b>1</b>                                  | 5    |
| 5. <sup>1</sup> H NMR spectrum of <b>1</b>                  | 6    |
| 6. <sup>13</sup> C NMR spectrum of <b>1</b>                 | 7    |
| 7. DEPT spectra of <b>1</b>                                 | 8    |
| 8. <sup>1</sup> H- <sup>1</sup> H COSY spectrum of <b>1</b> | 10   |
| 9. HMQC spectrum of <b>1</b>                                | 18   |
| 10. HMBC spectrum of <b>1</b>                               | 21   |
| 11. NOESY spectrum of <b>1</b>                              | 24   |

## ESIMS and HRESIMS Spectra of 1

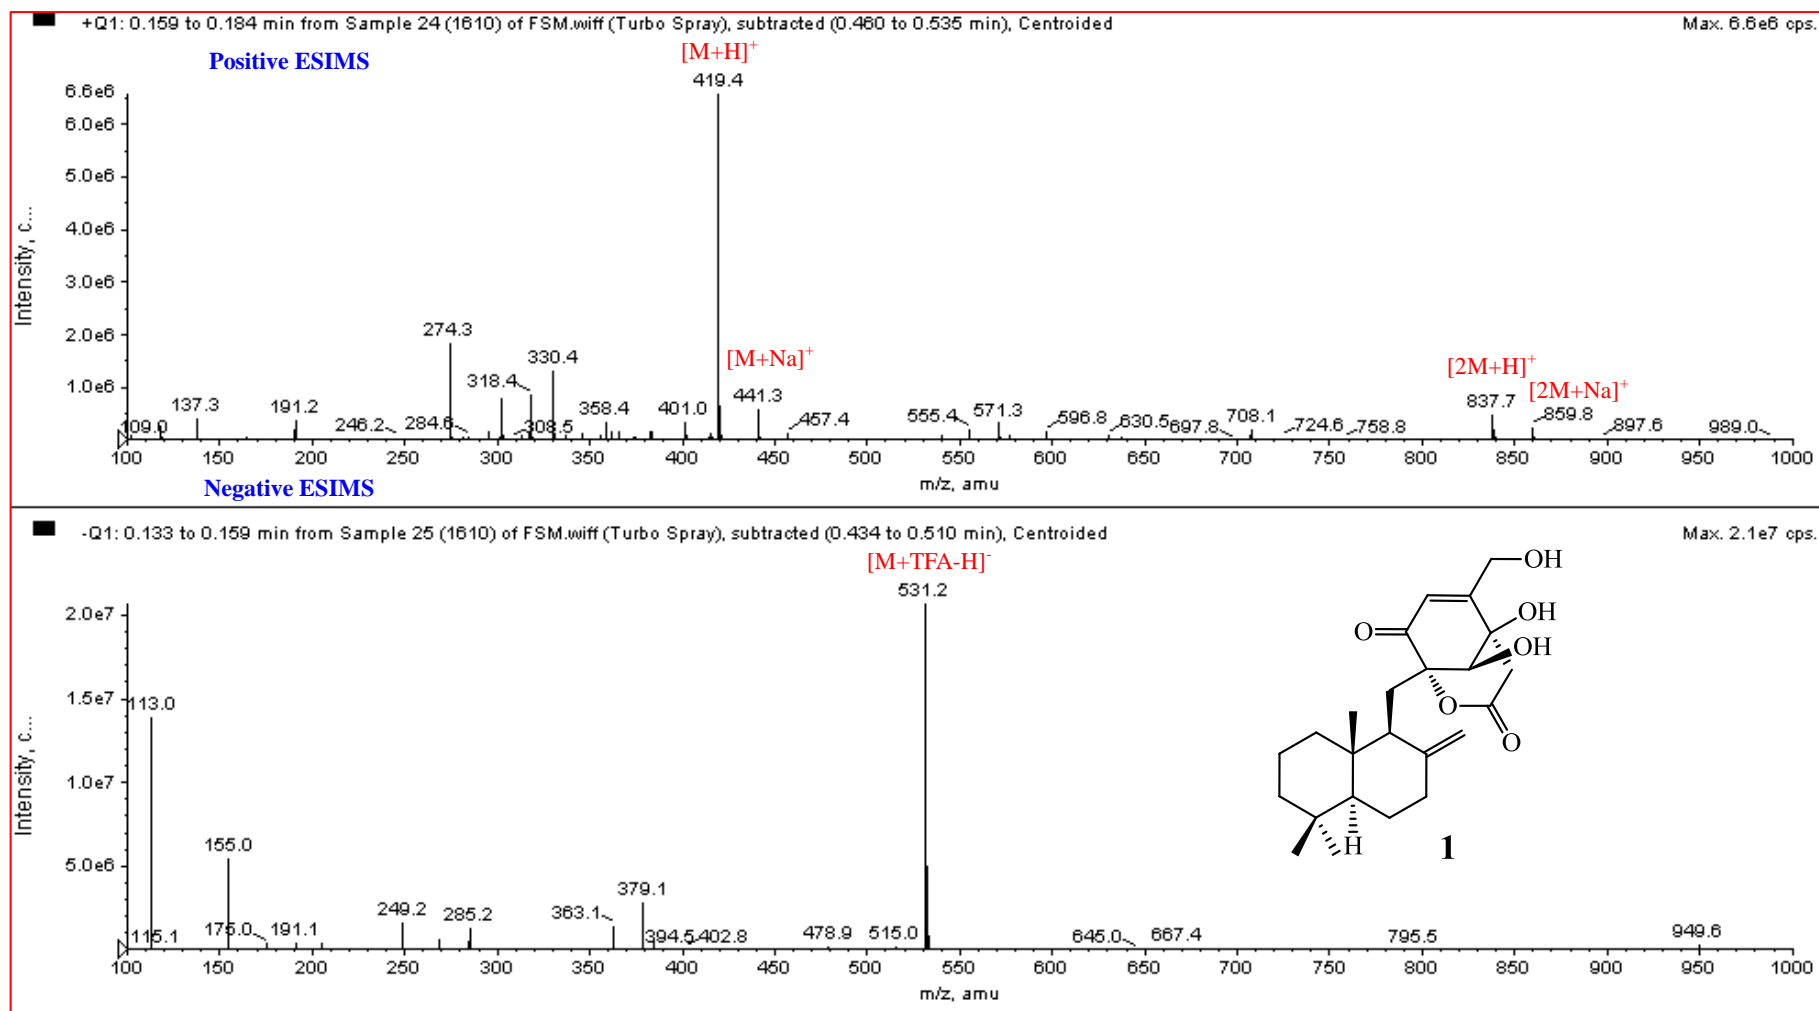

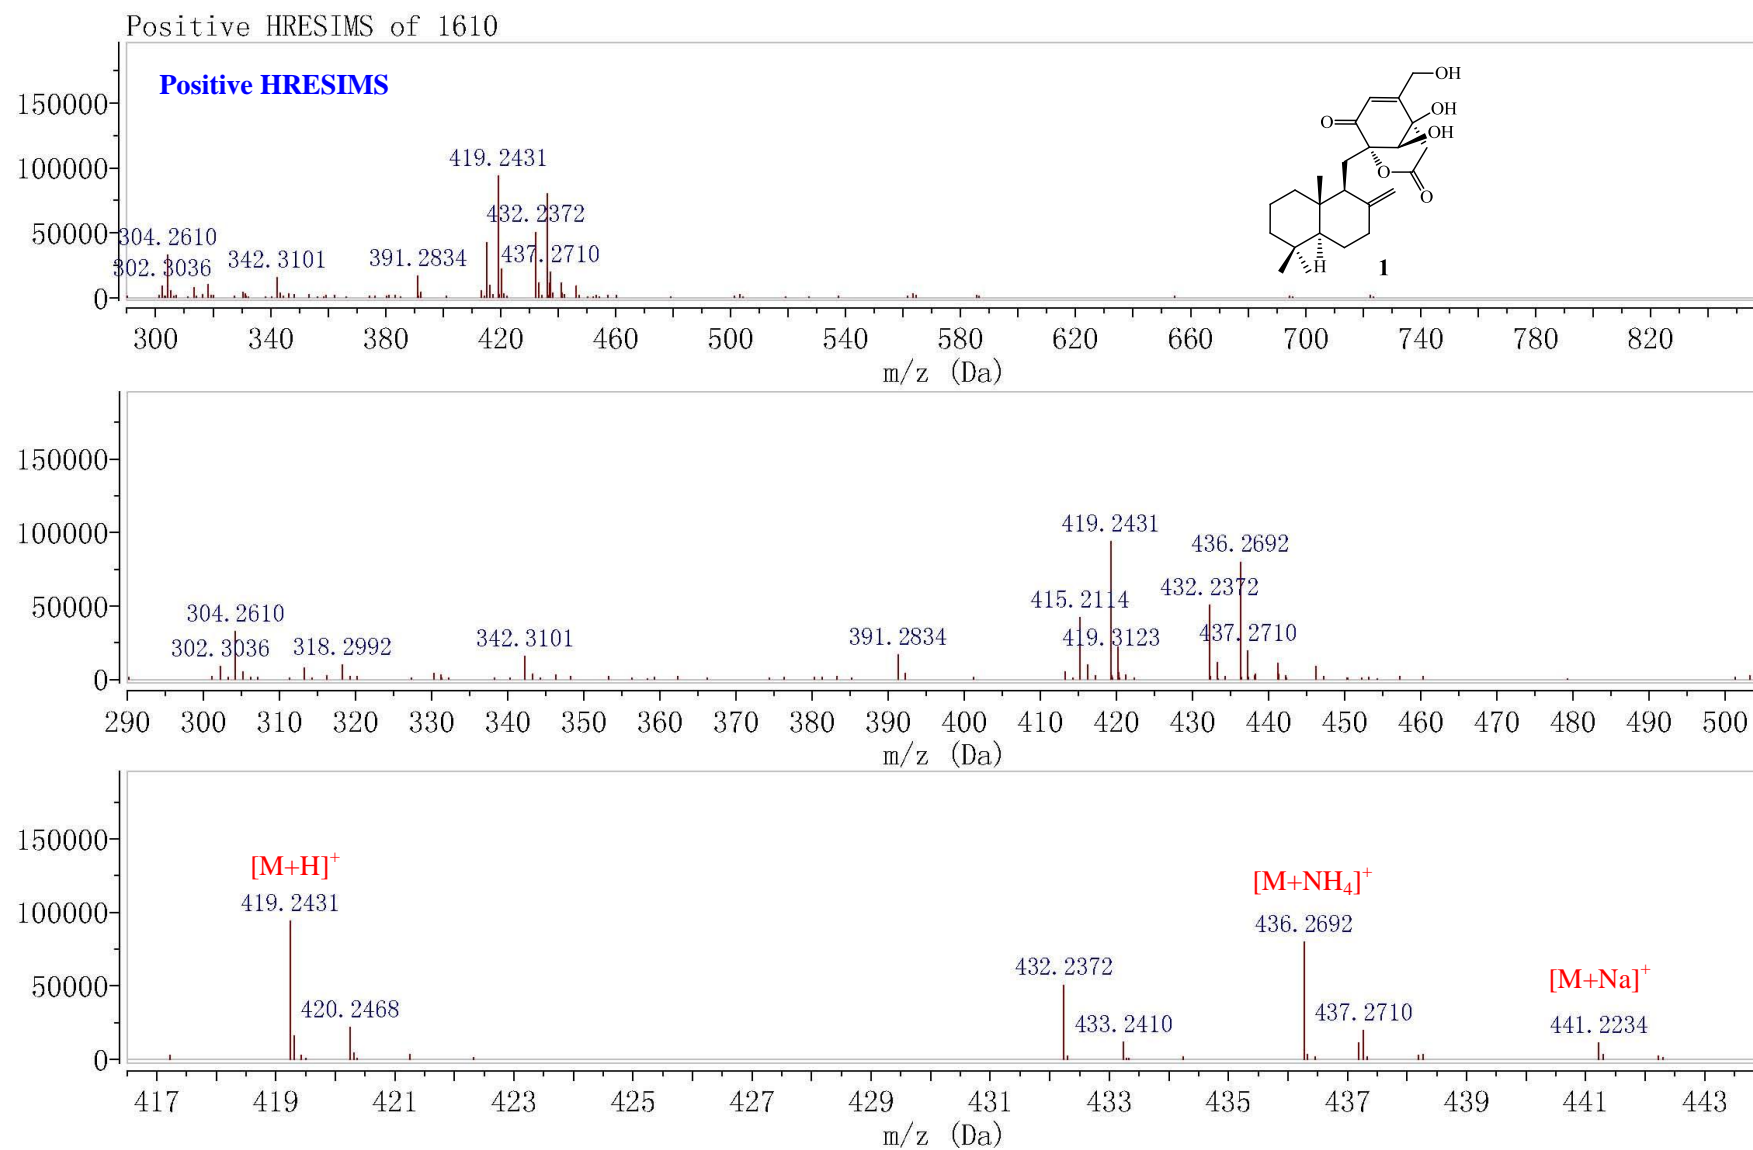

# UV Spectrum of **1** in MeOH

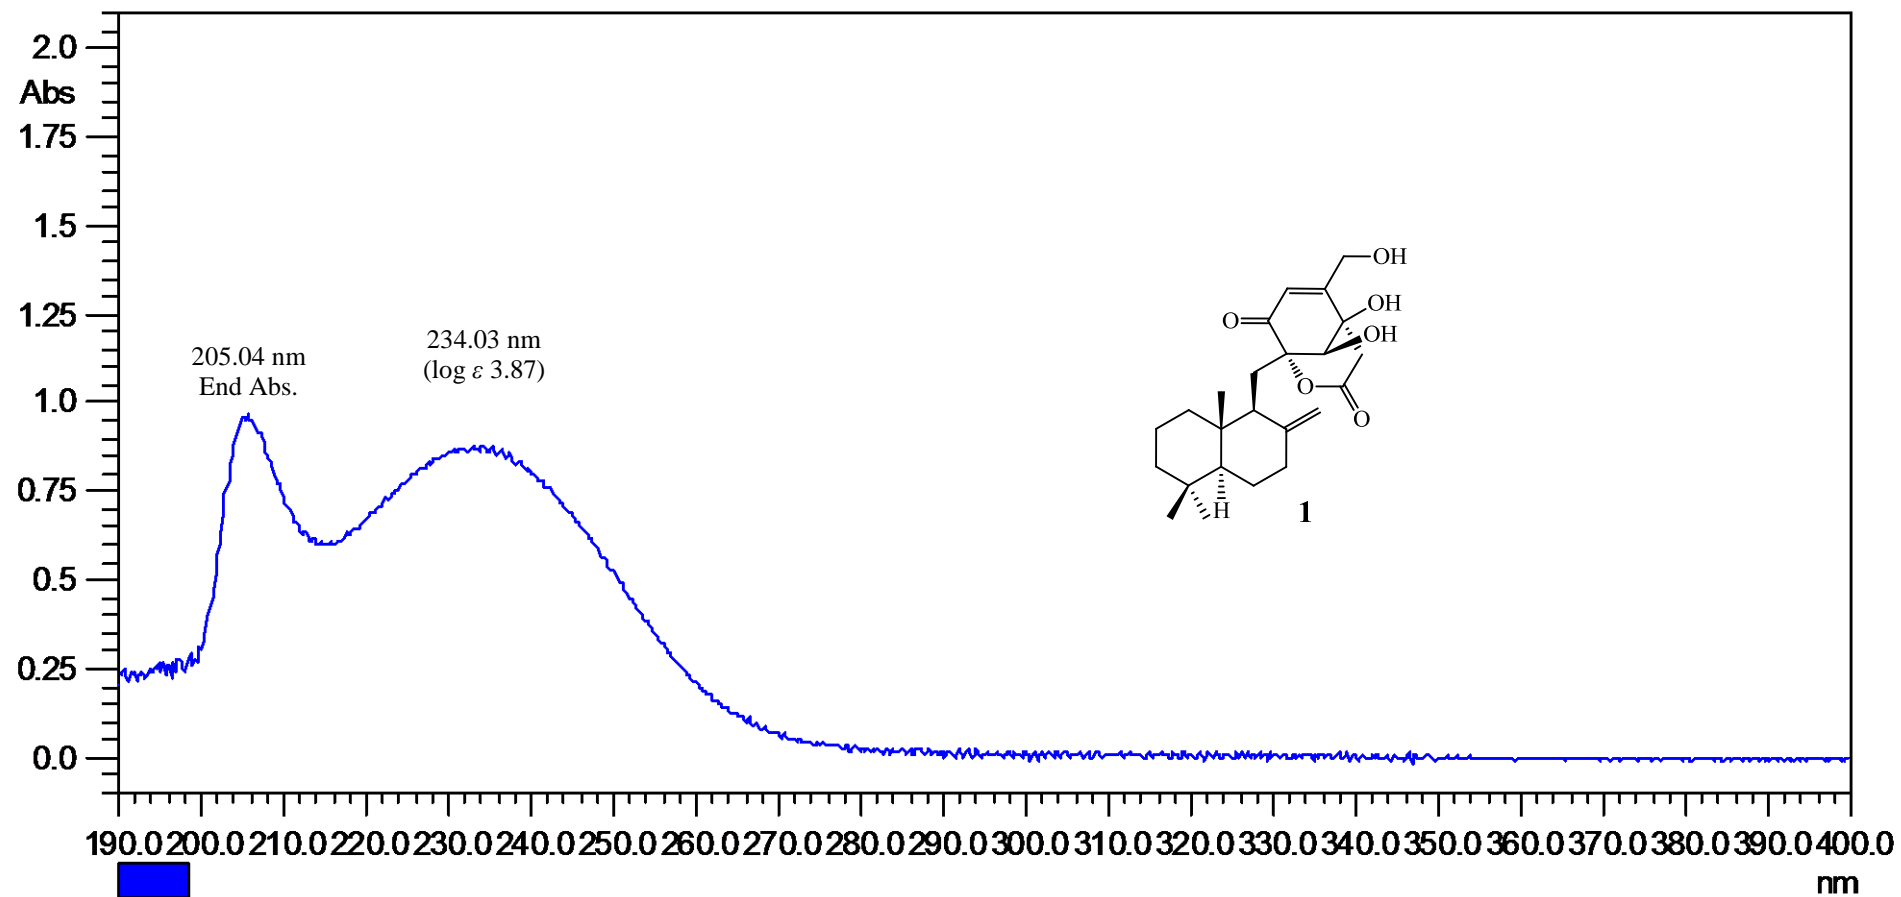

# IR Spectrum of **1**

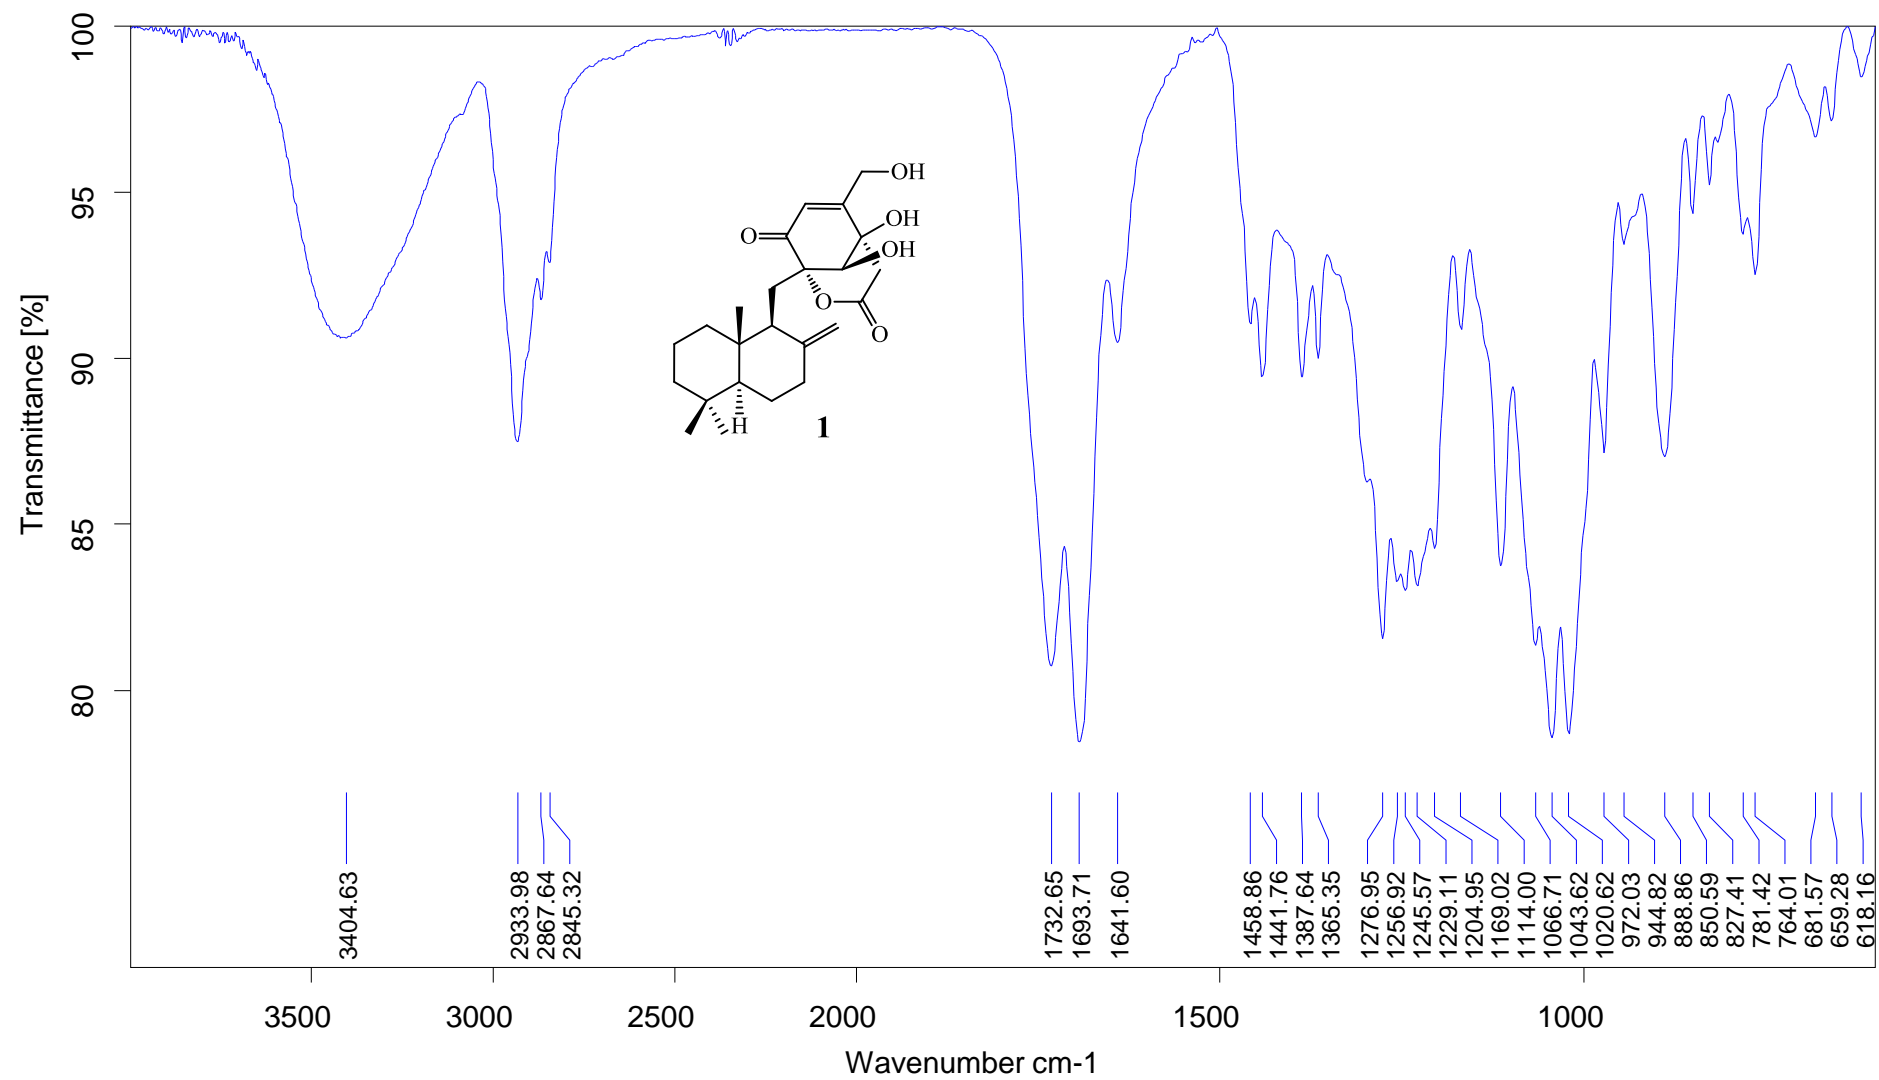

# 400 MHz $^1\text{H}$ NMR Spectrum of **1**

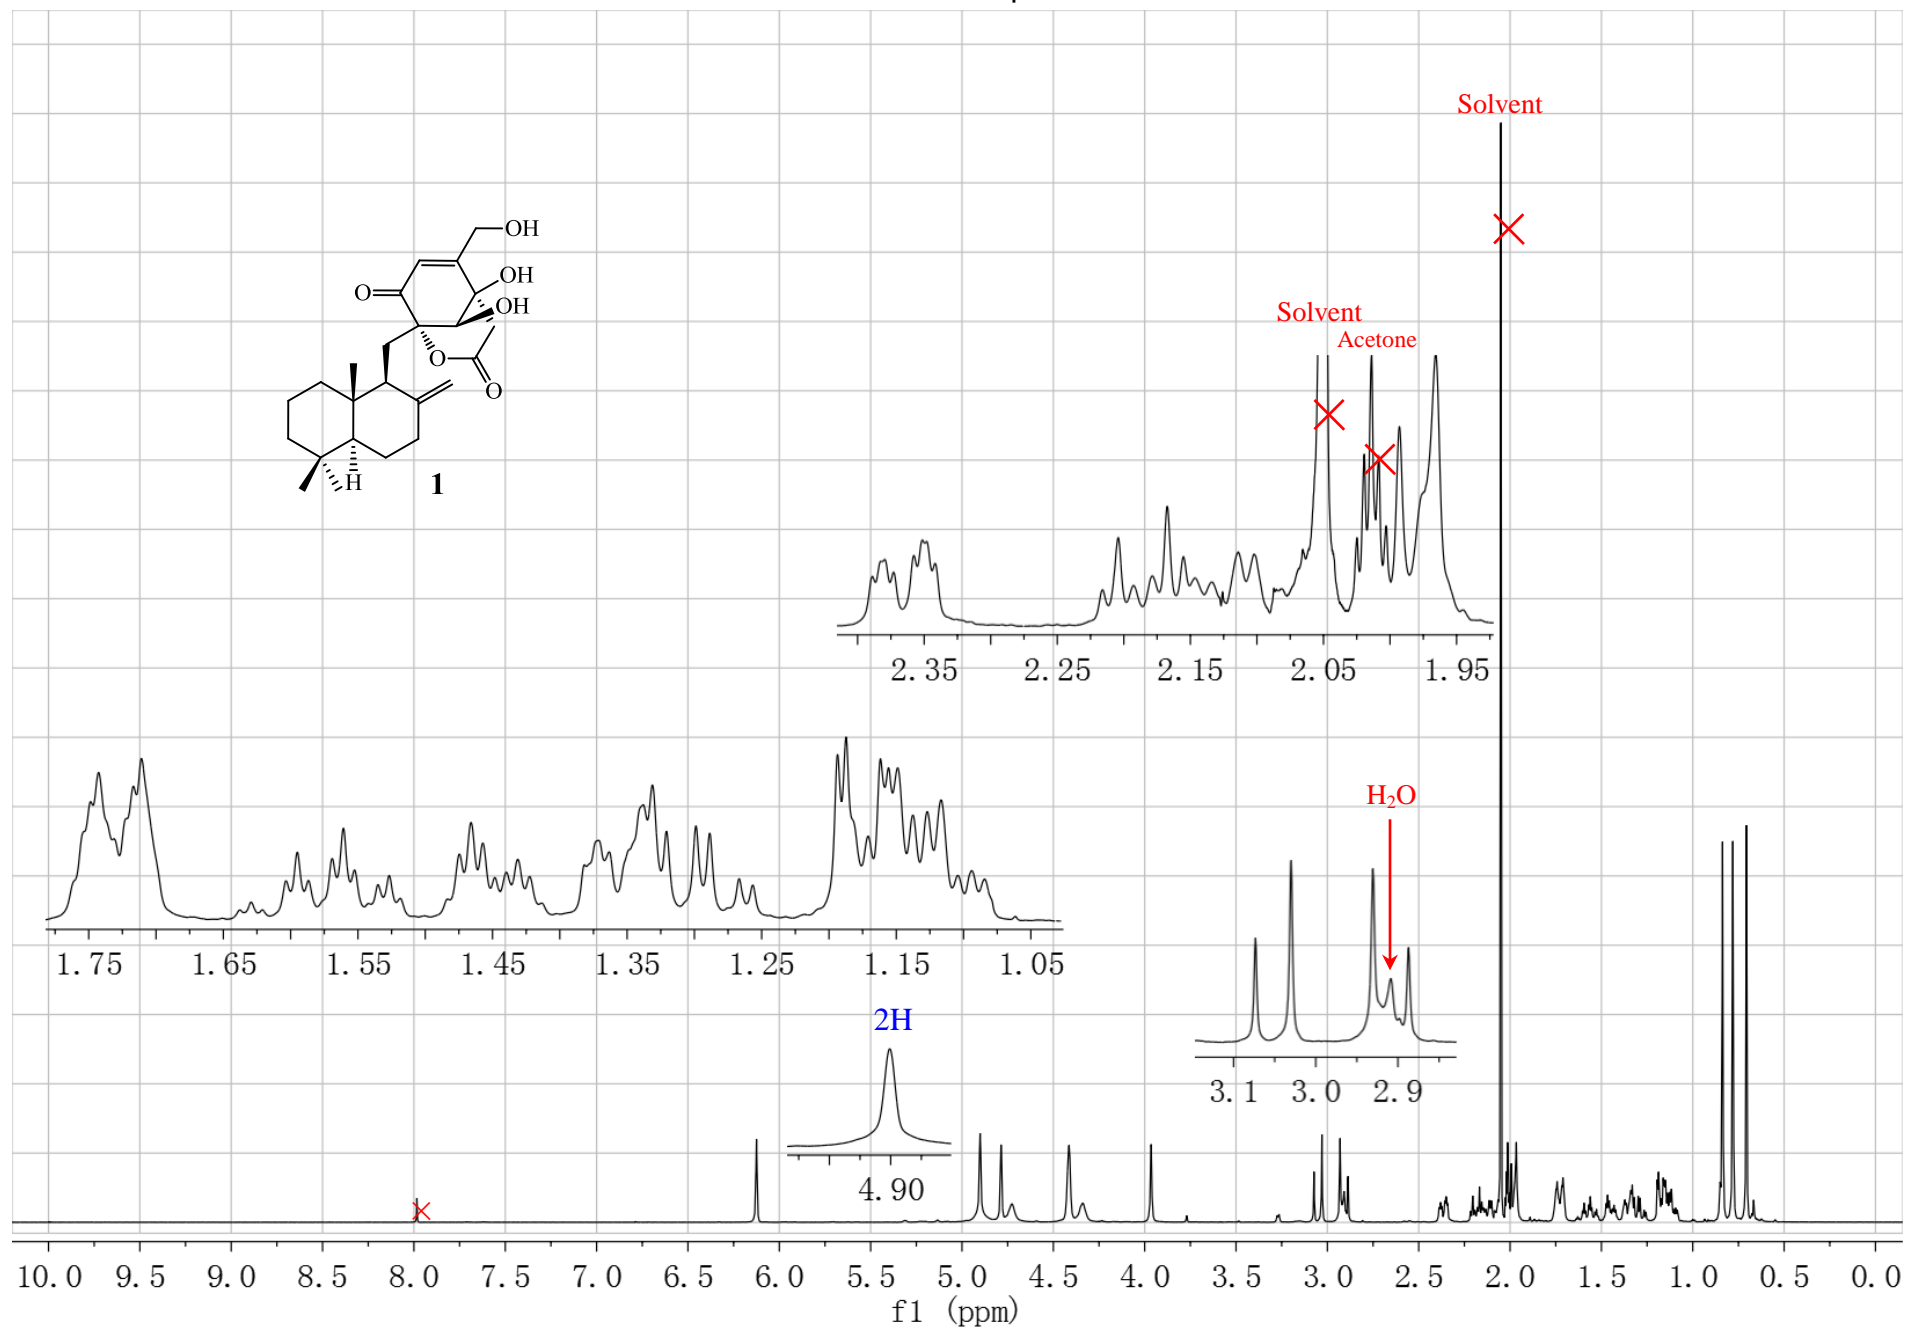

100 MHz  $^{13}\text{C}$  NMR Spectrum of **1**

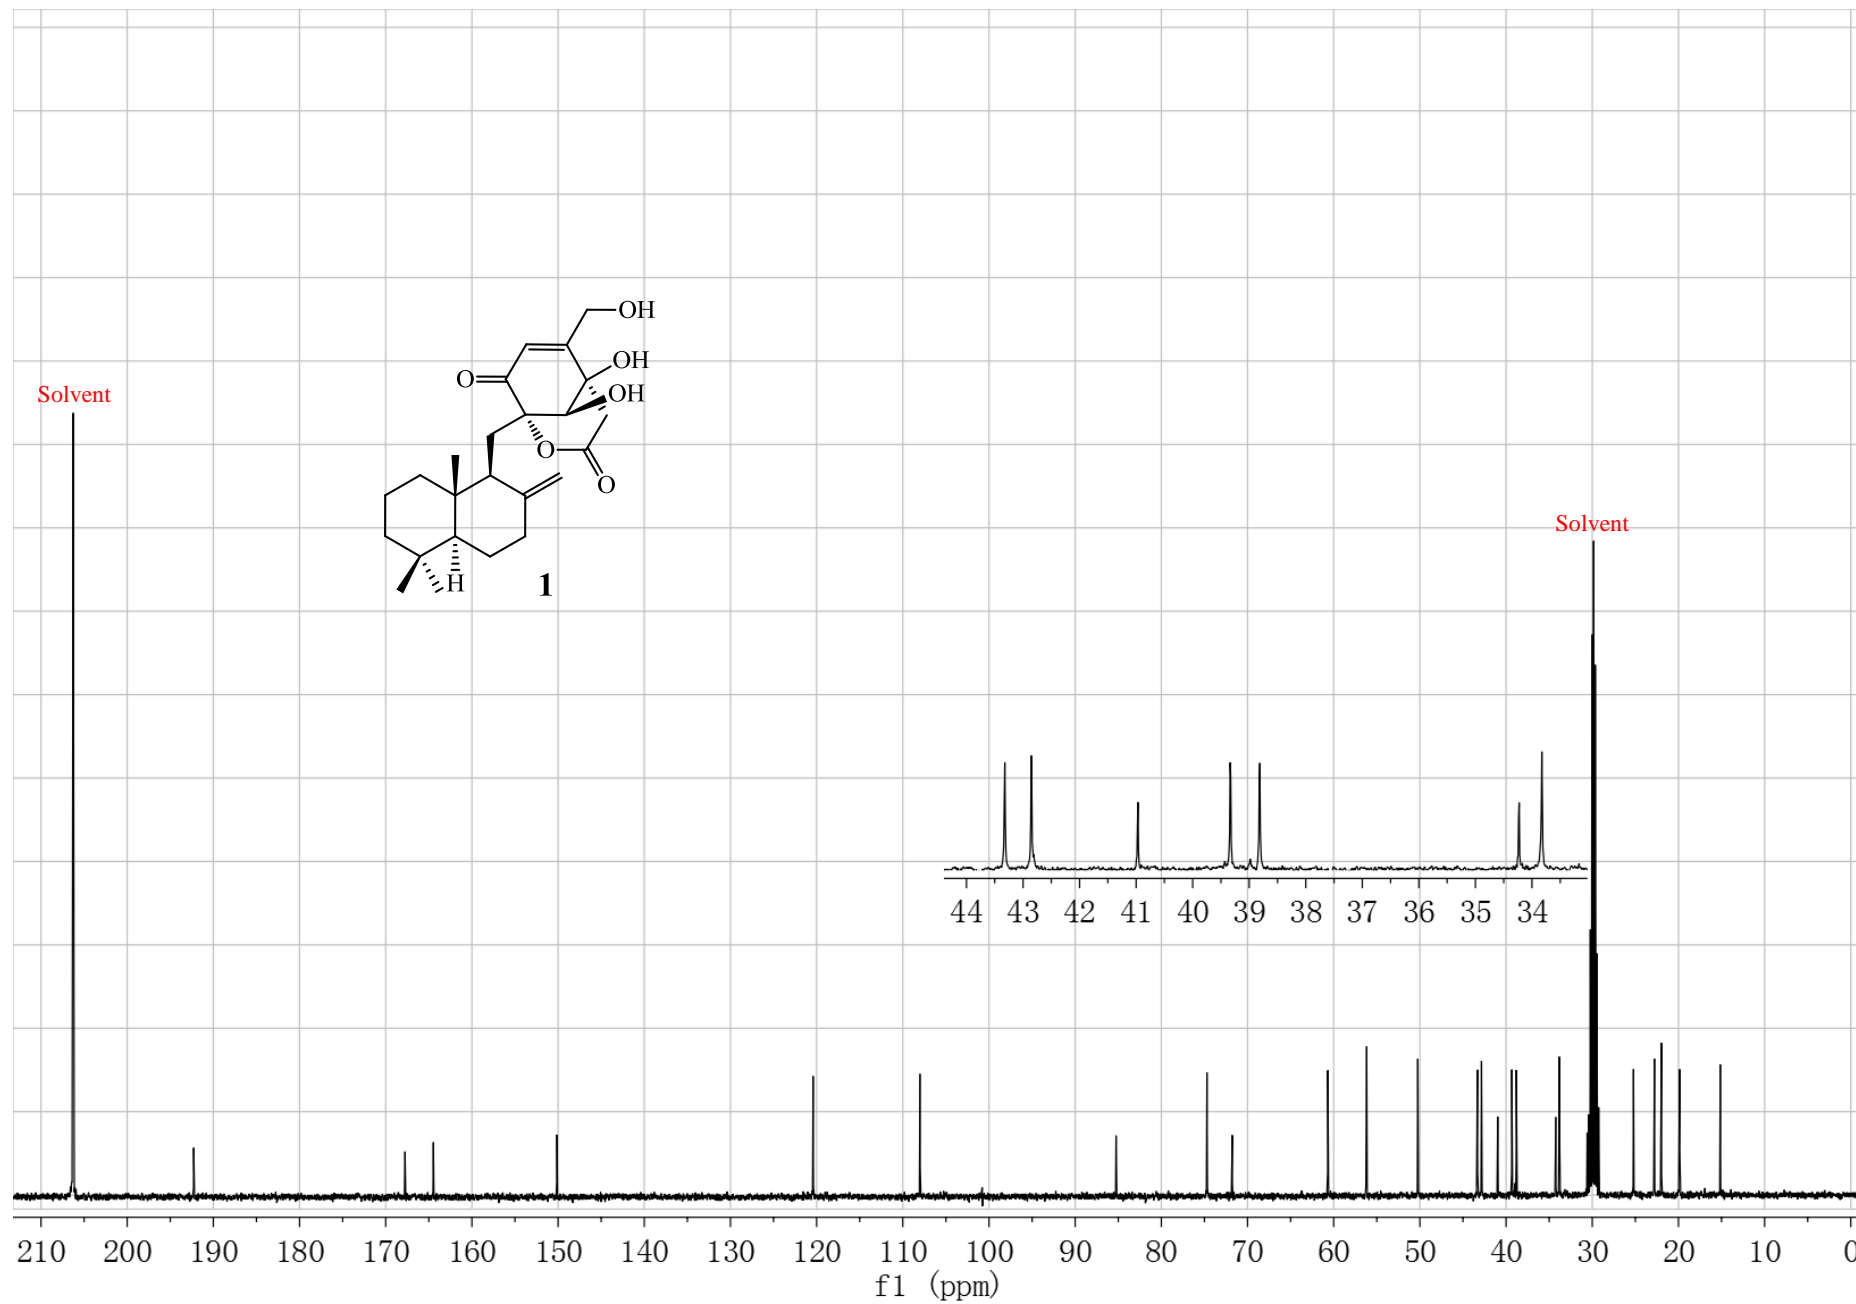

100 MHz  $^{13}\text{C}$  NMR and DEPT Spectra of **1** in Acetone- $d_6$

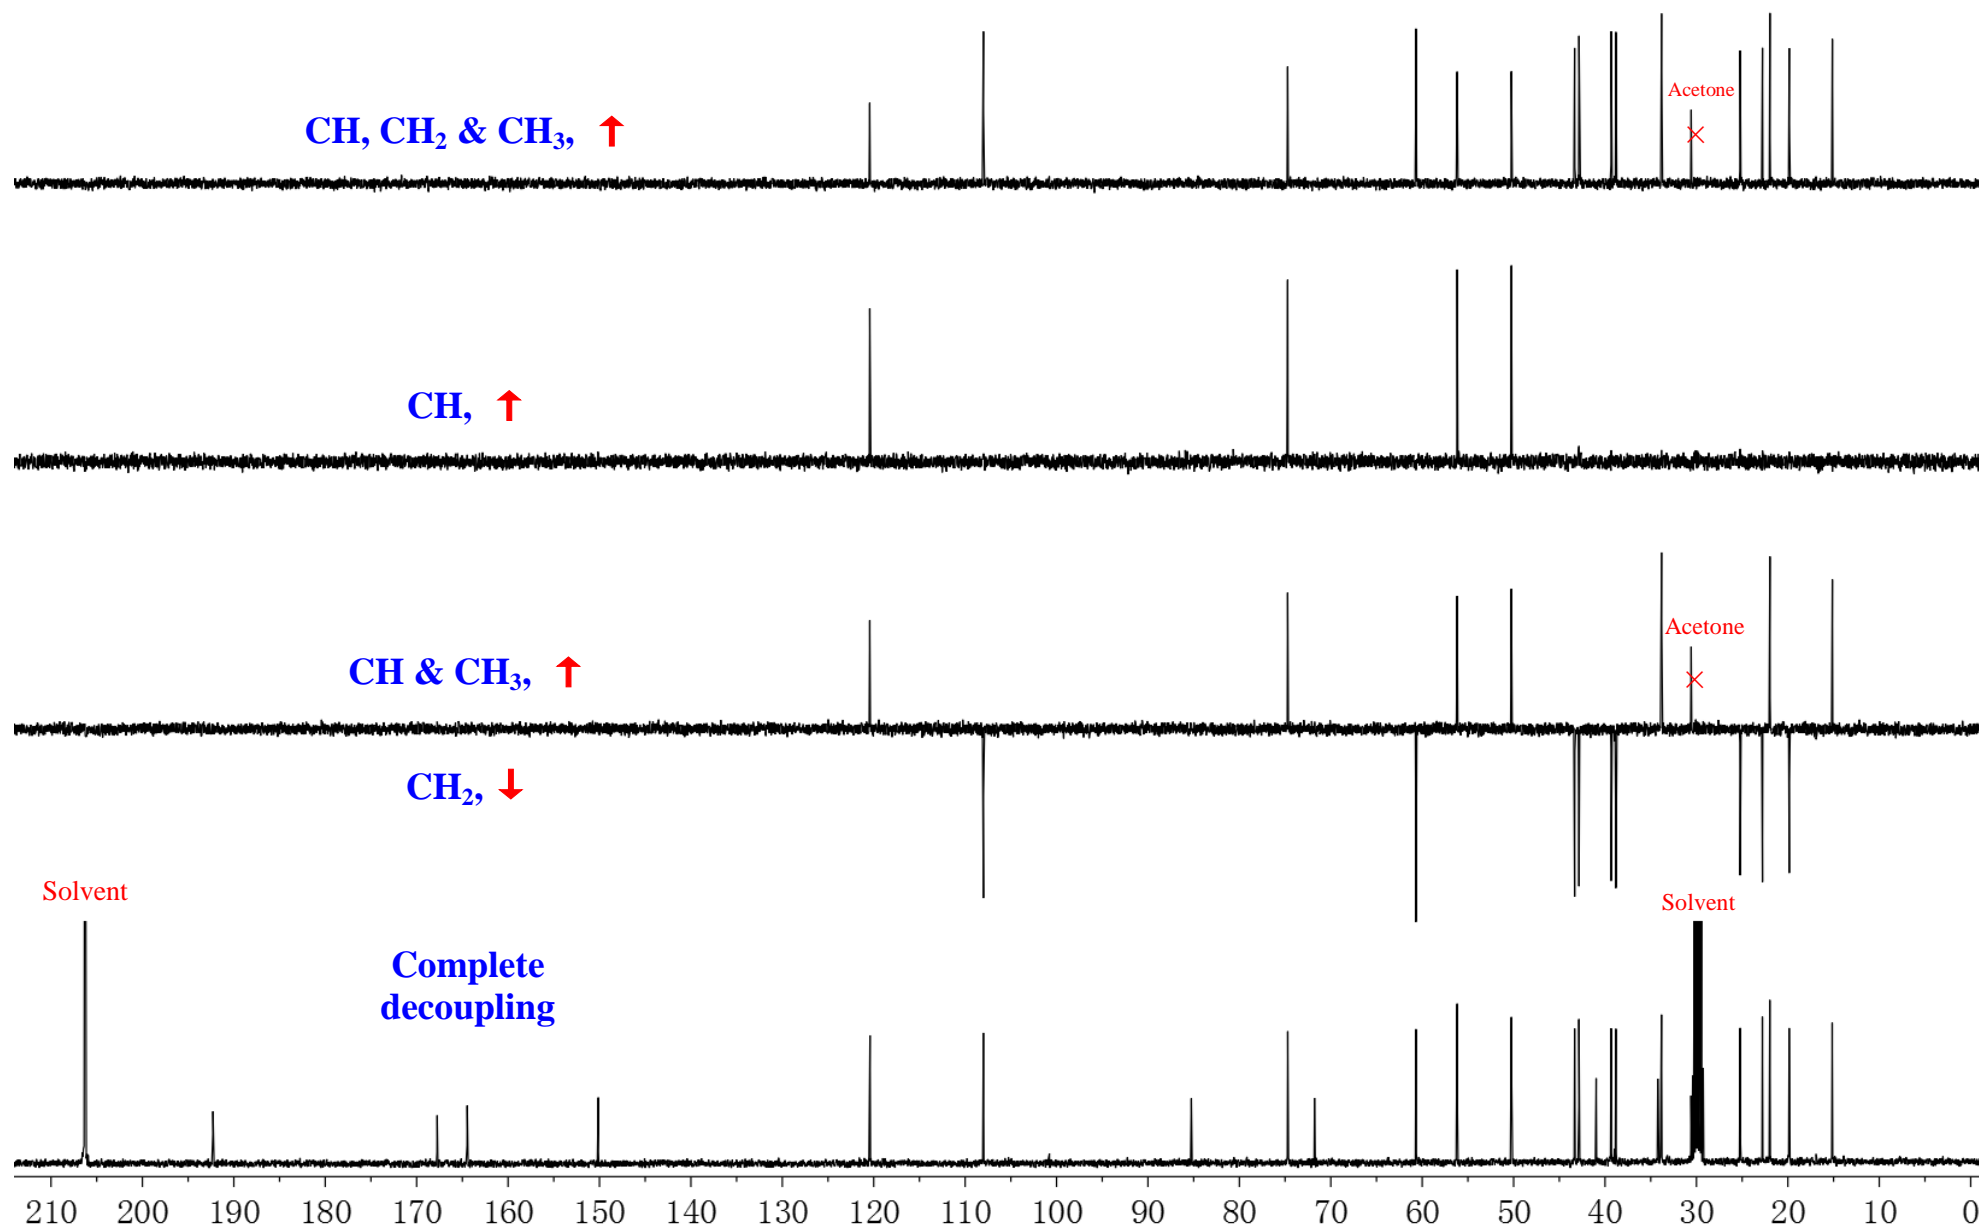



Expanded 100 MHz  $^{13}\text{C}$  NMR and DEPT Spectra of **1** in Acetone- $d_6$

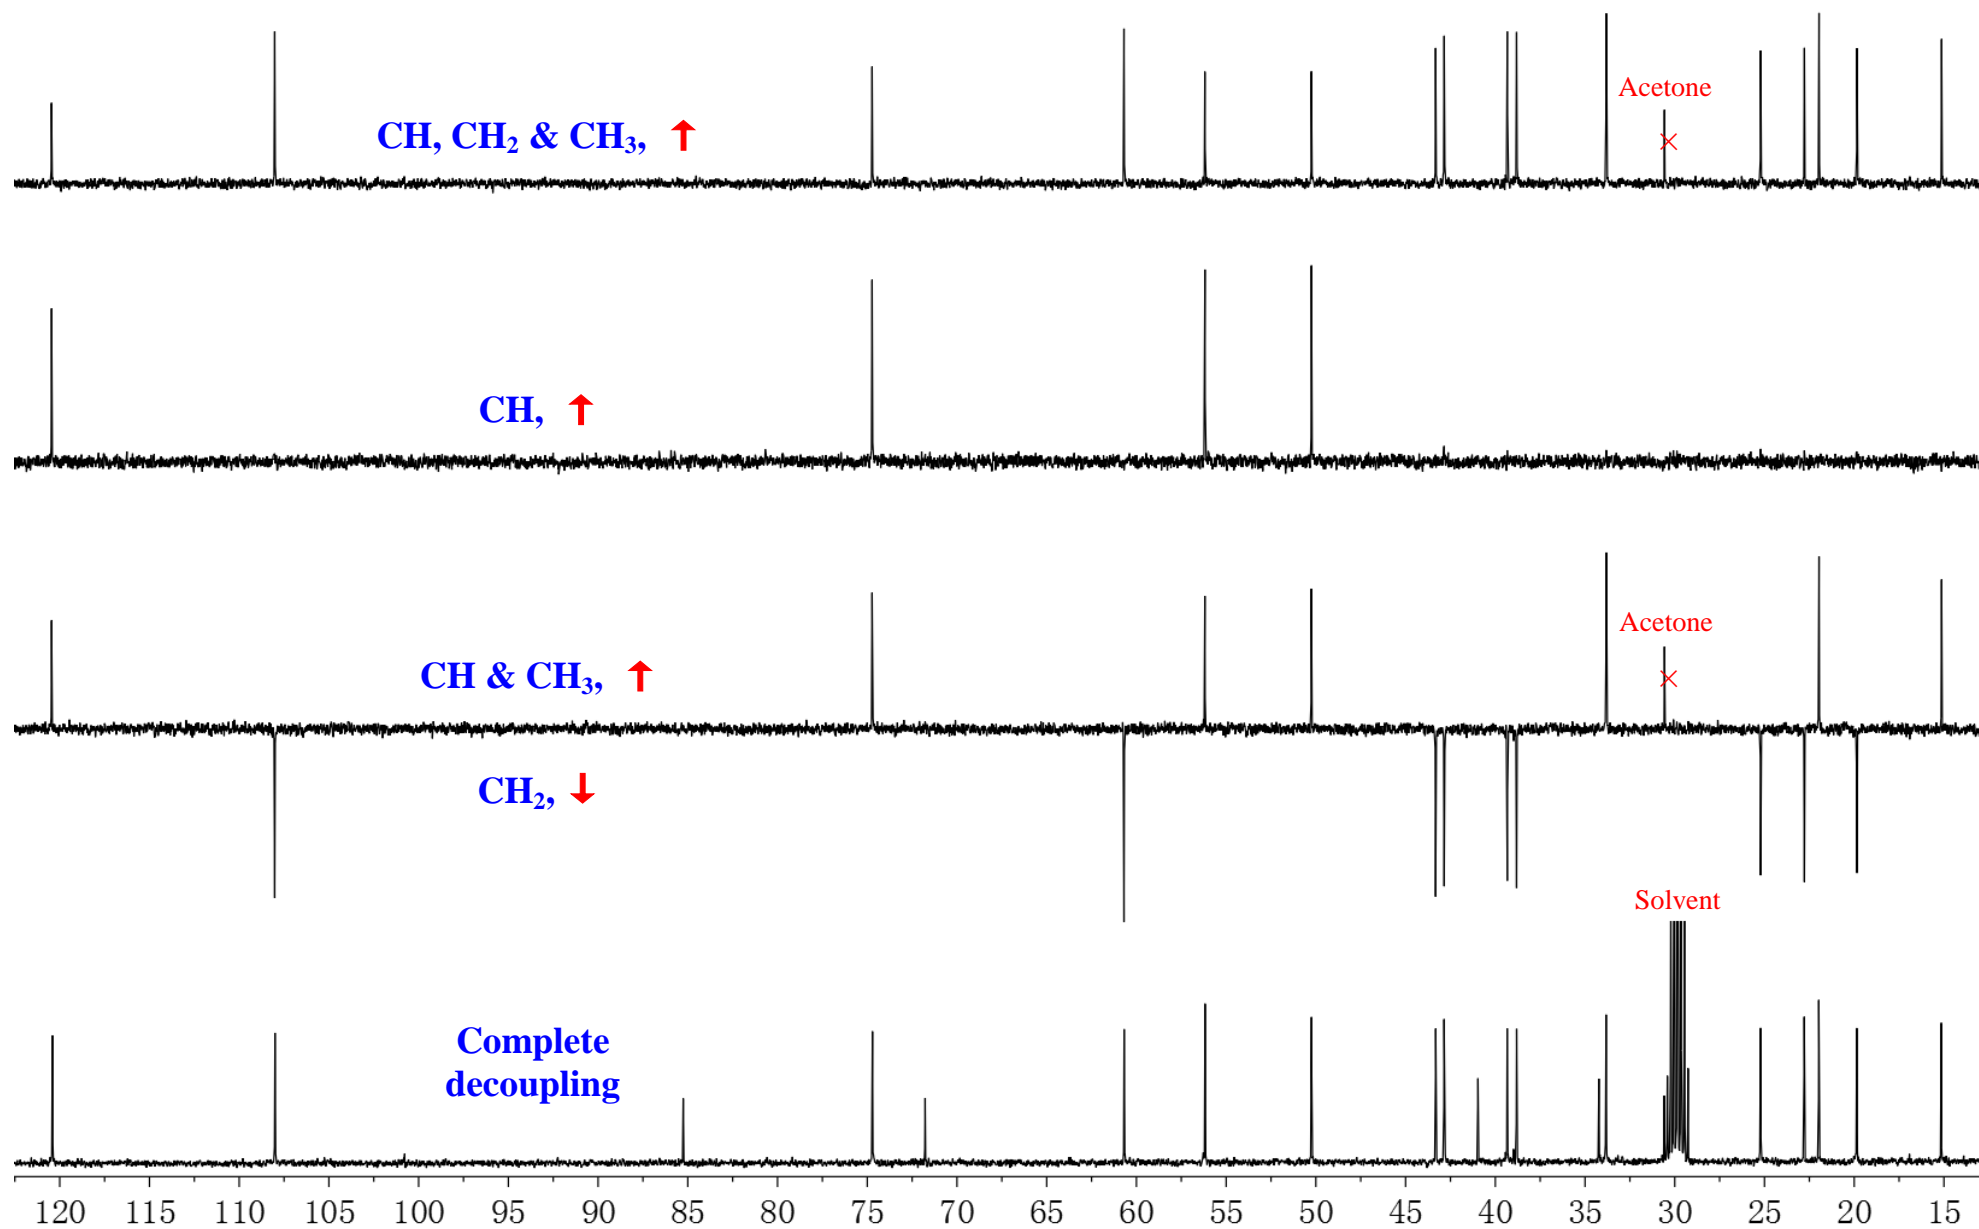

$^1\text{H}$ - $^1\text{H}$  COSY Spectrum of **1** in Acetone- $d_6$

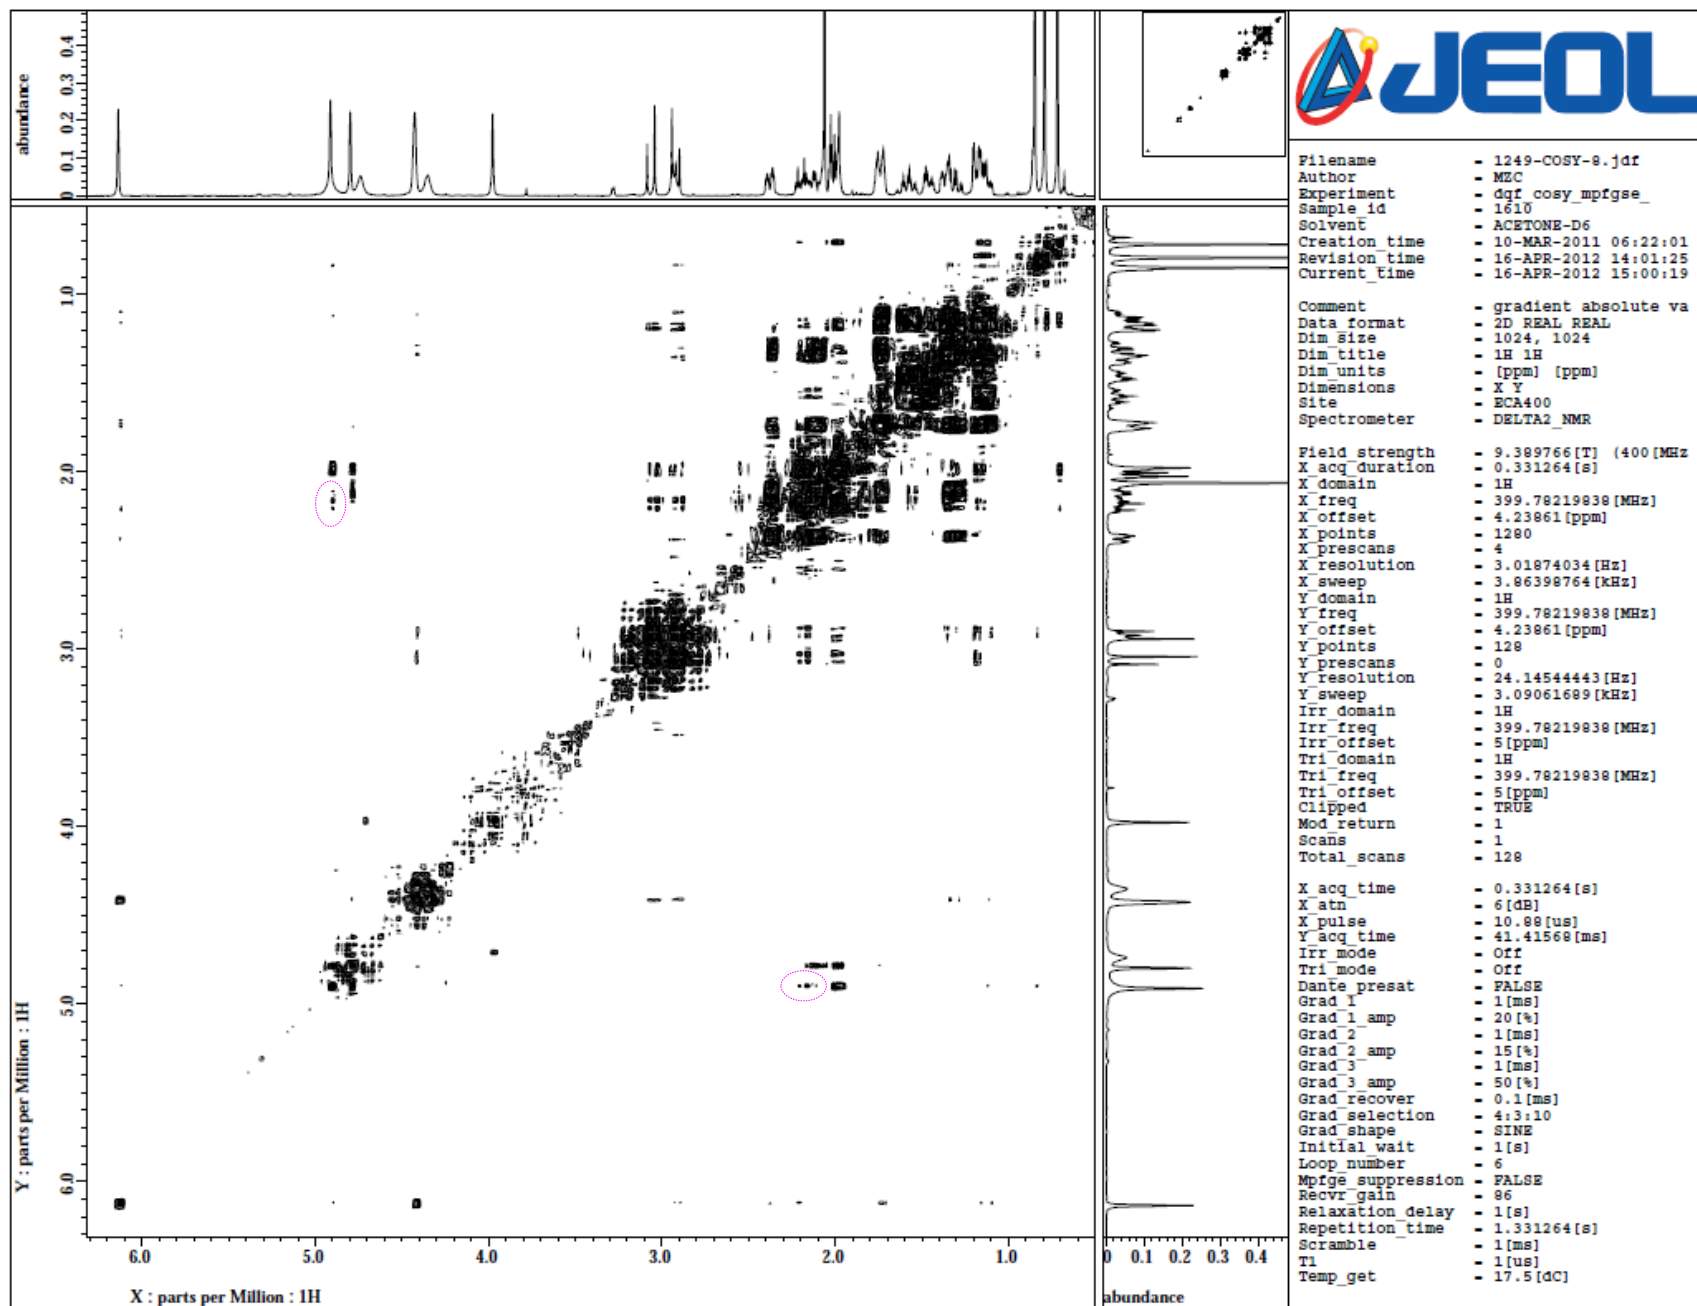

$^1\text{H}$ - $^1\text{H}$  COSY Spectrum of **1** in Acetone- $d_6$

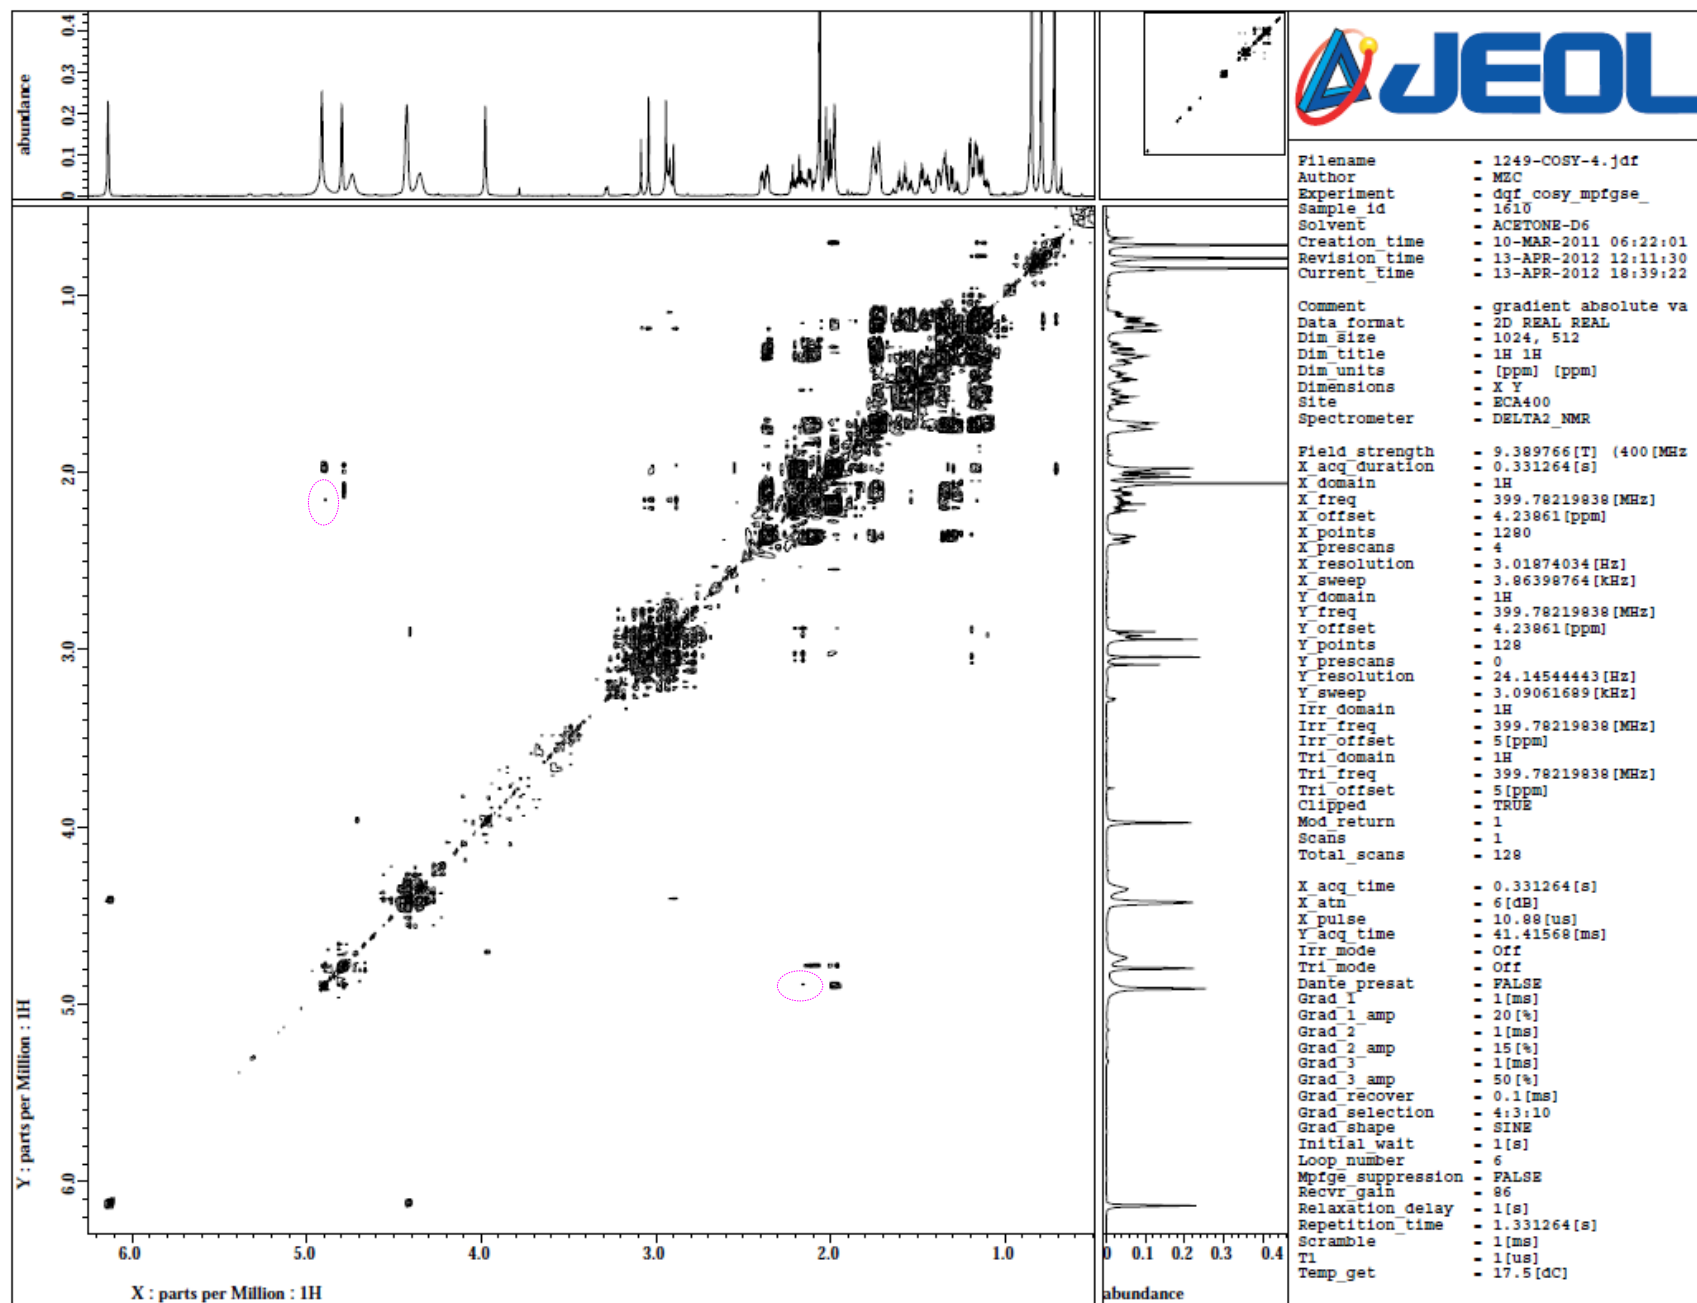

$^1\text{H}$ - $^1\text{H}$  COSY Spectrum of **1** in Acetone- $d_6$

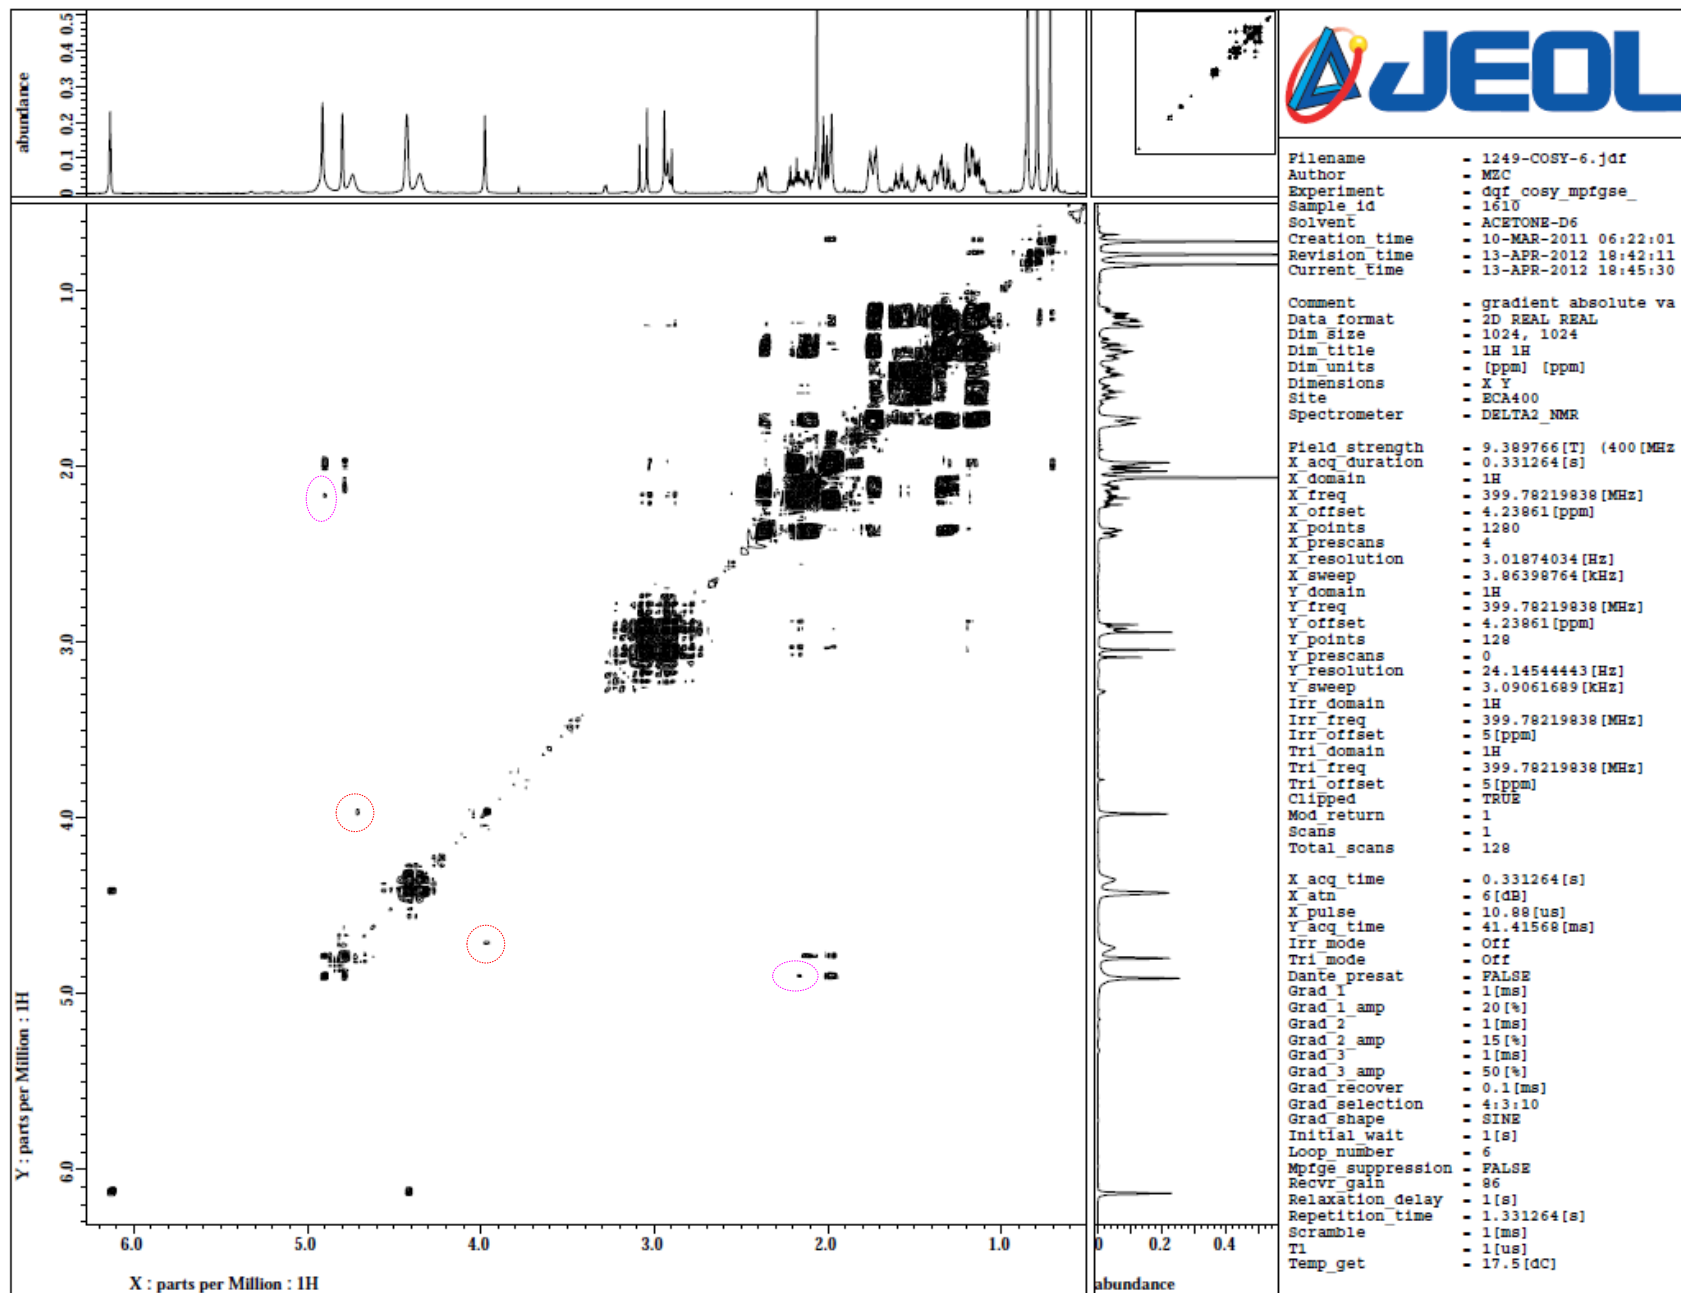

$^1\text{H}$ - $^1\text{H}$  COSY Spectrum of **1** in Acetone- $d_6$

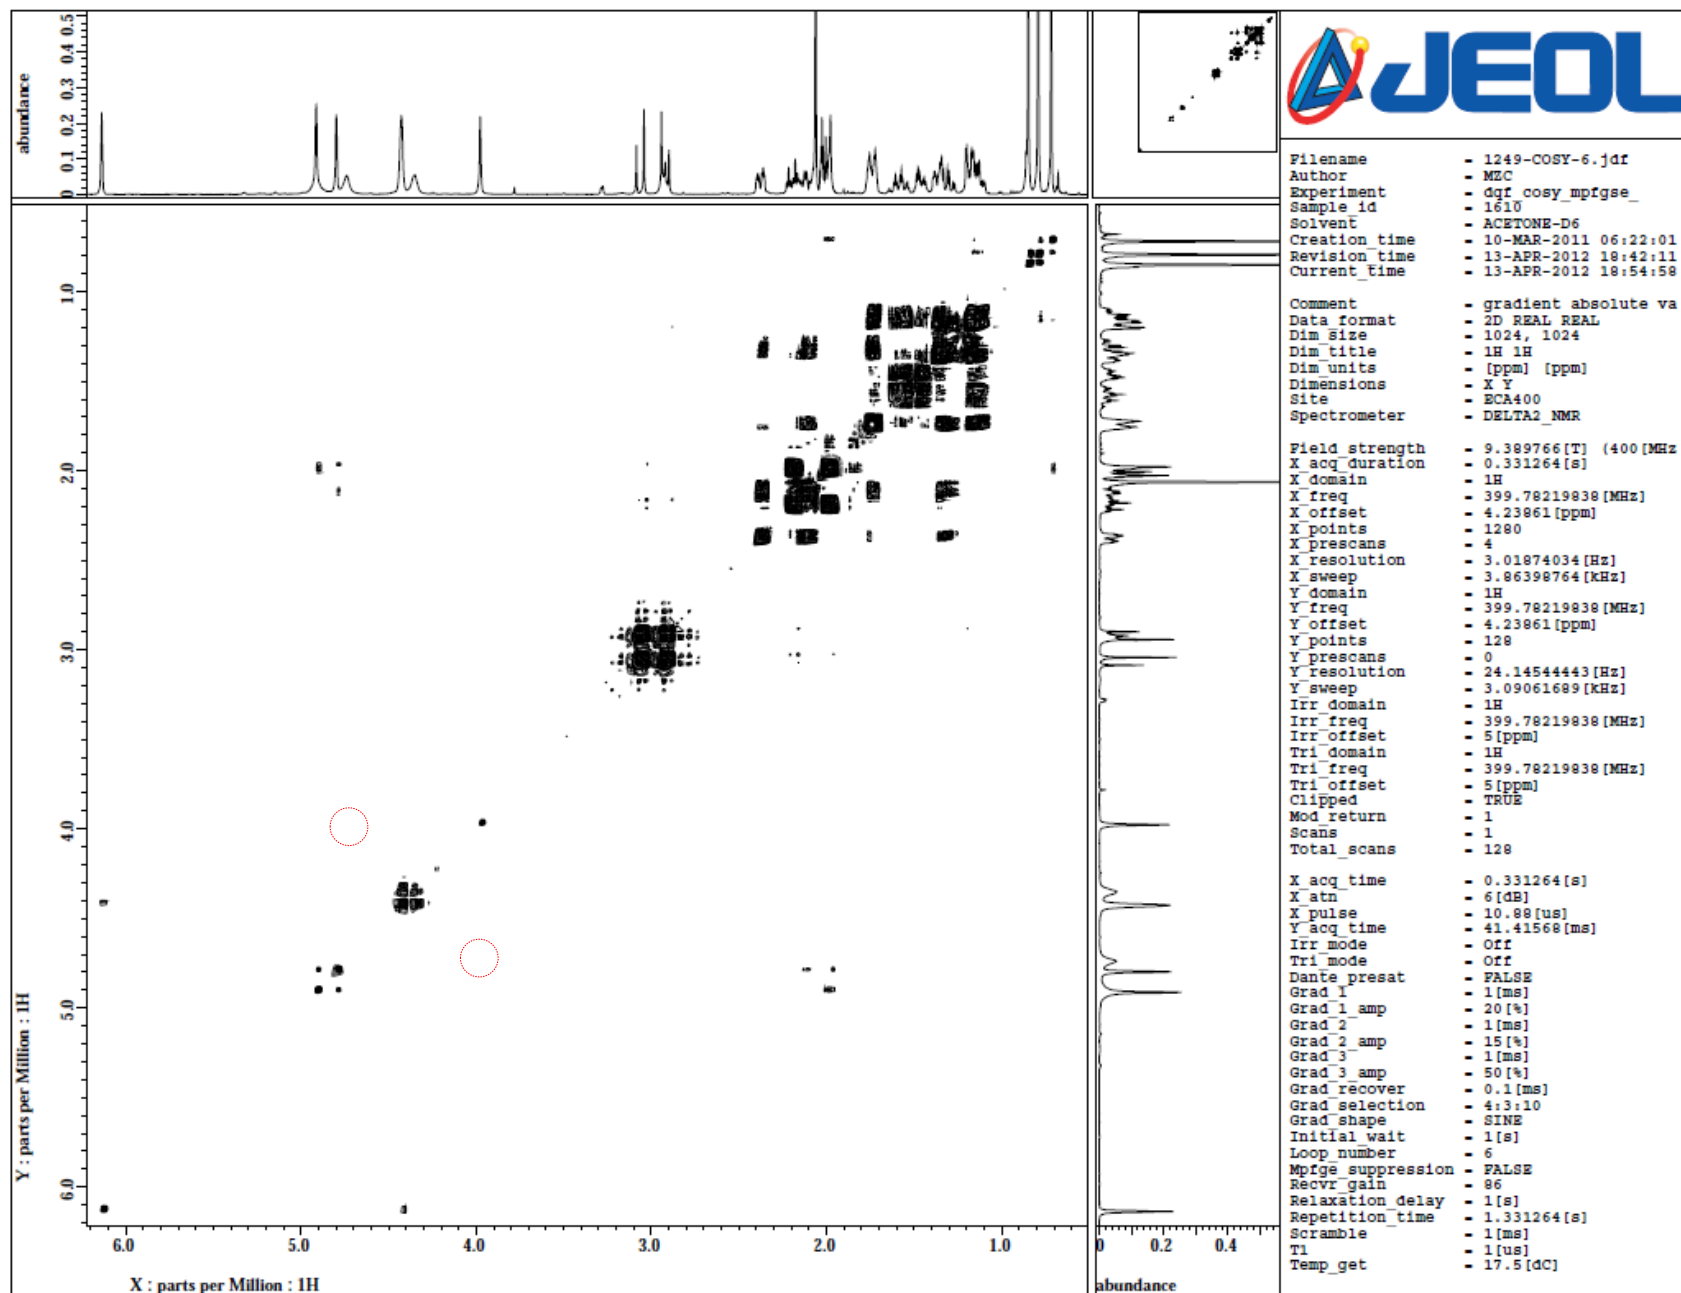

# Expanded $^1\text{H}$ - $^1\text{H}$ COSY Spectrum of **1** in Acetone- $d_6$

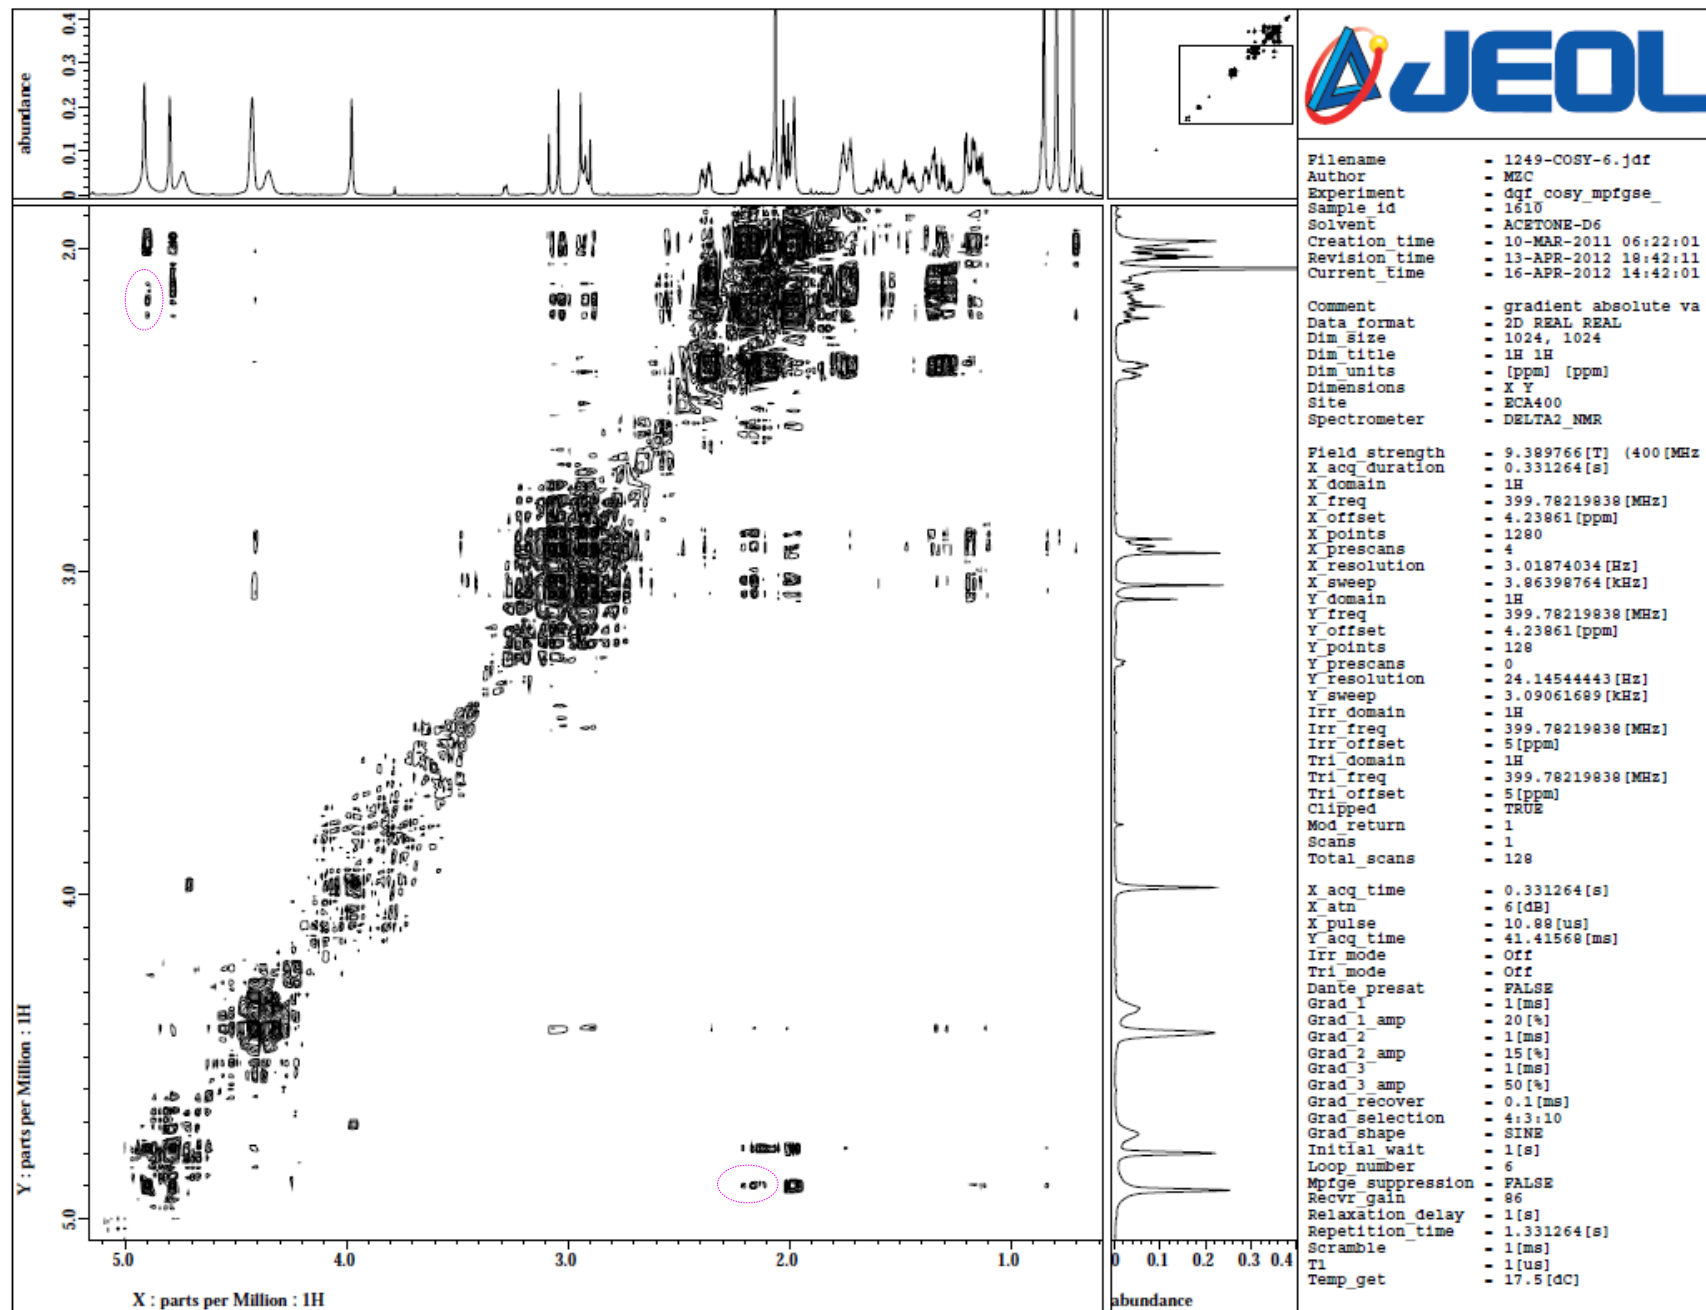



# Expanded $^1\text{H}$ - $^1\text{H}$ COSY Spectrum of 1 in Acetone- $d_6$

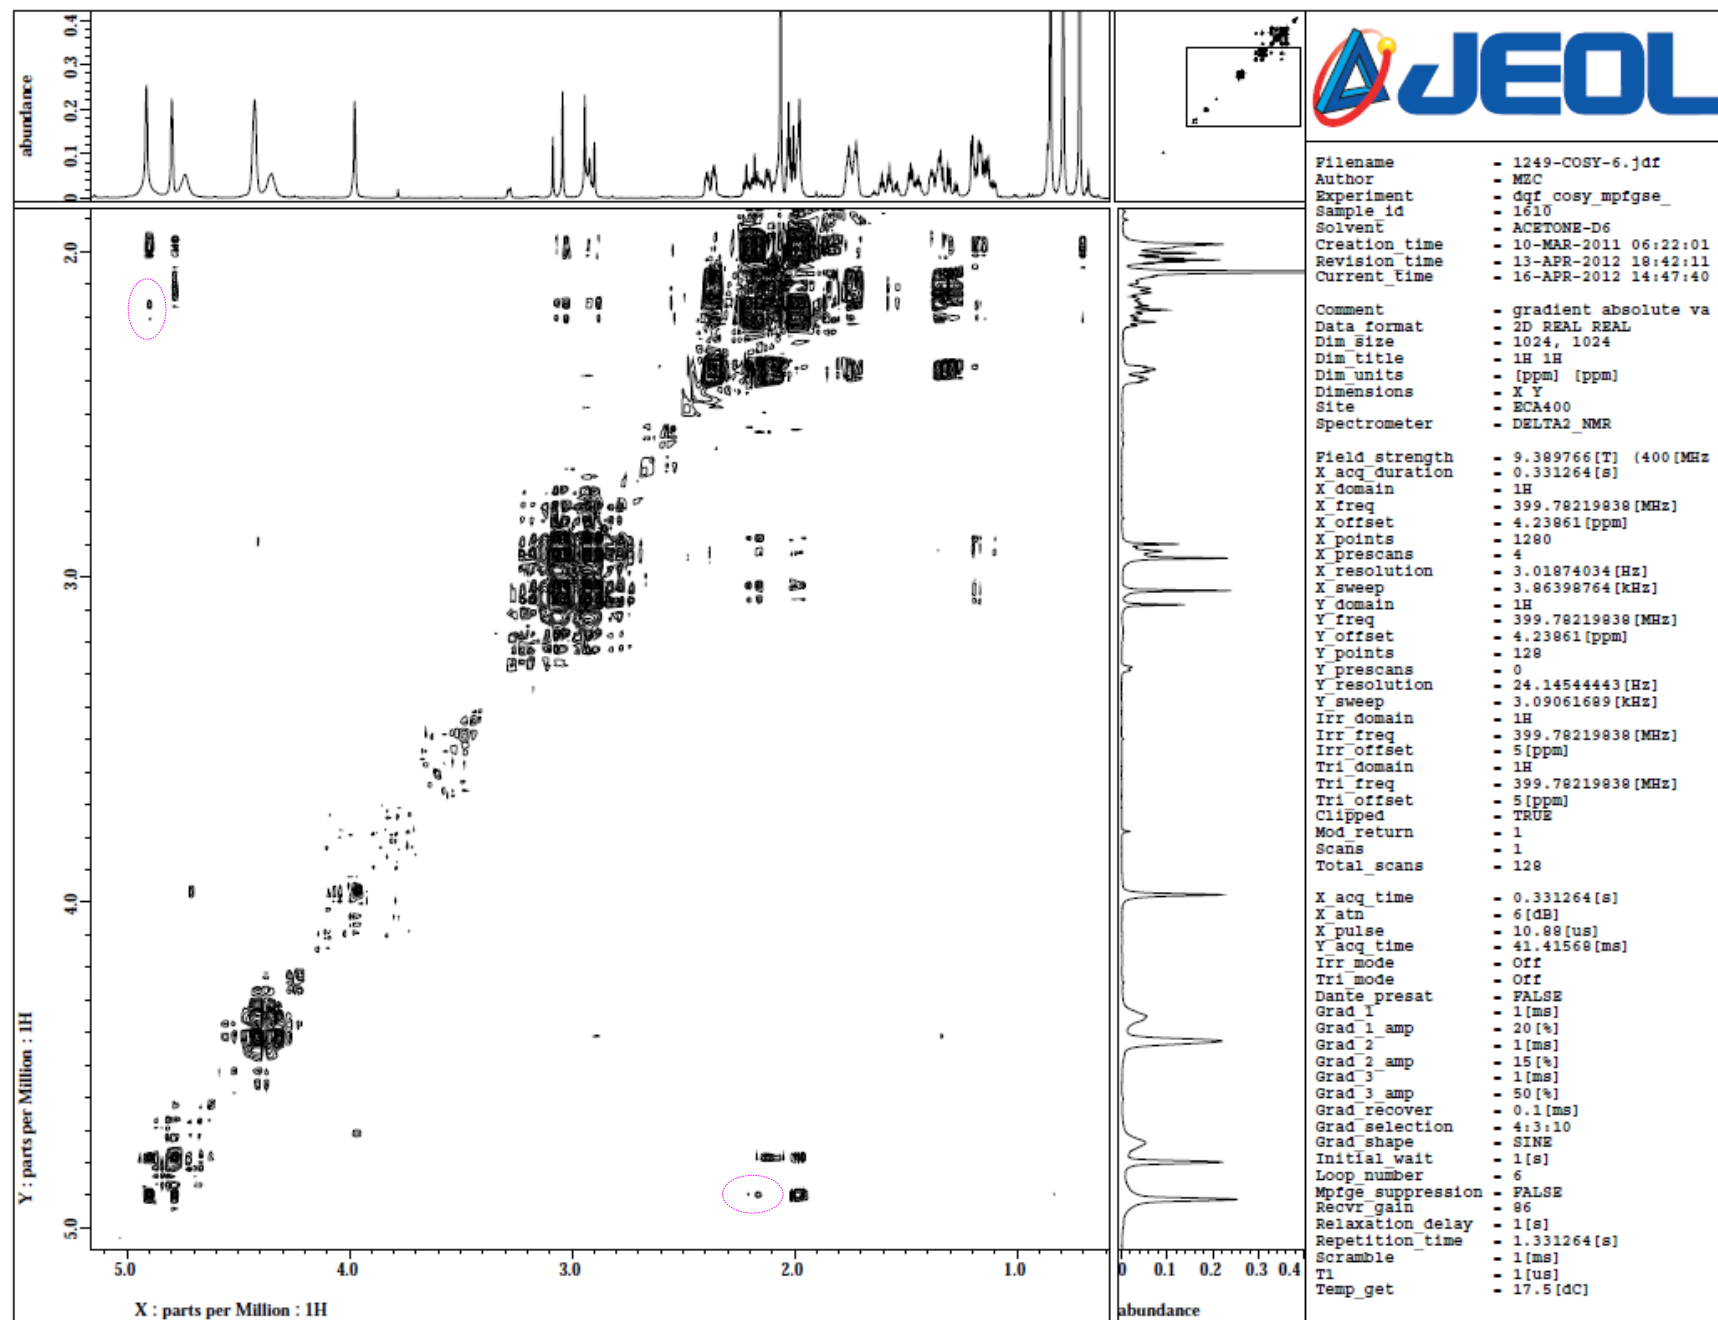

# Expanded $^1\text{H}$ - $^1\text{H}$ COSY Spectrum of 1 in Acetone- $d_6$

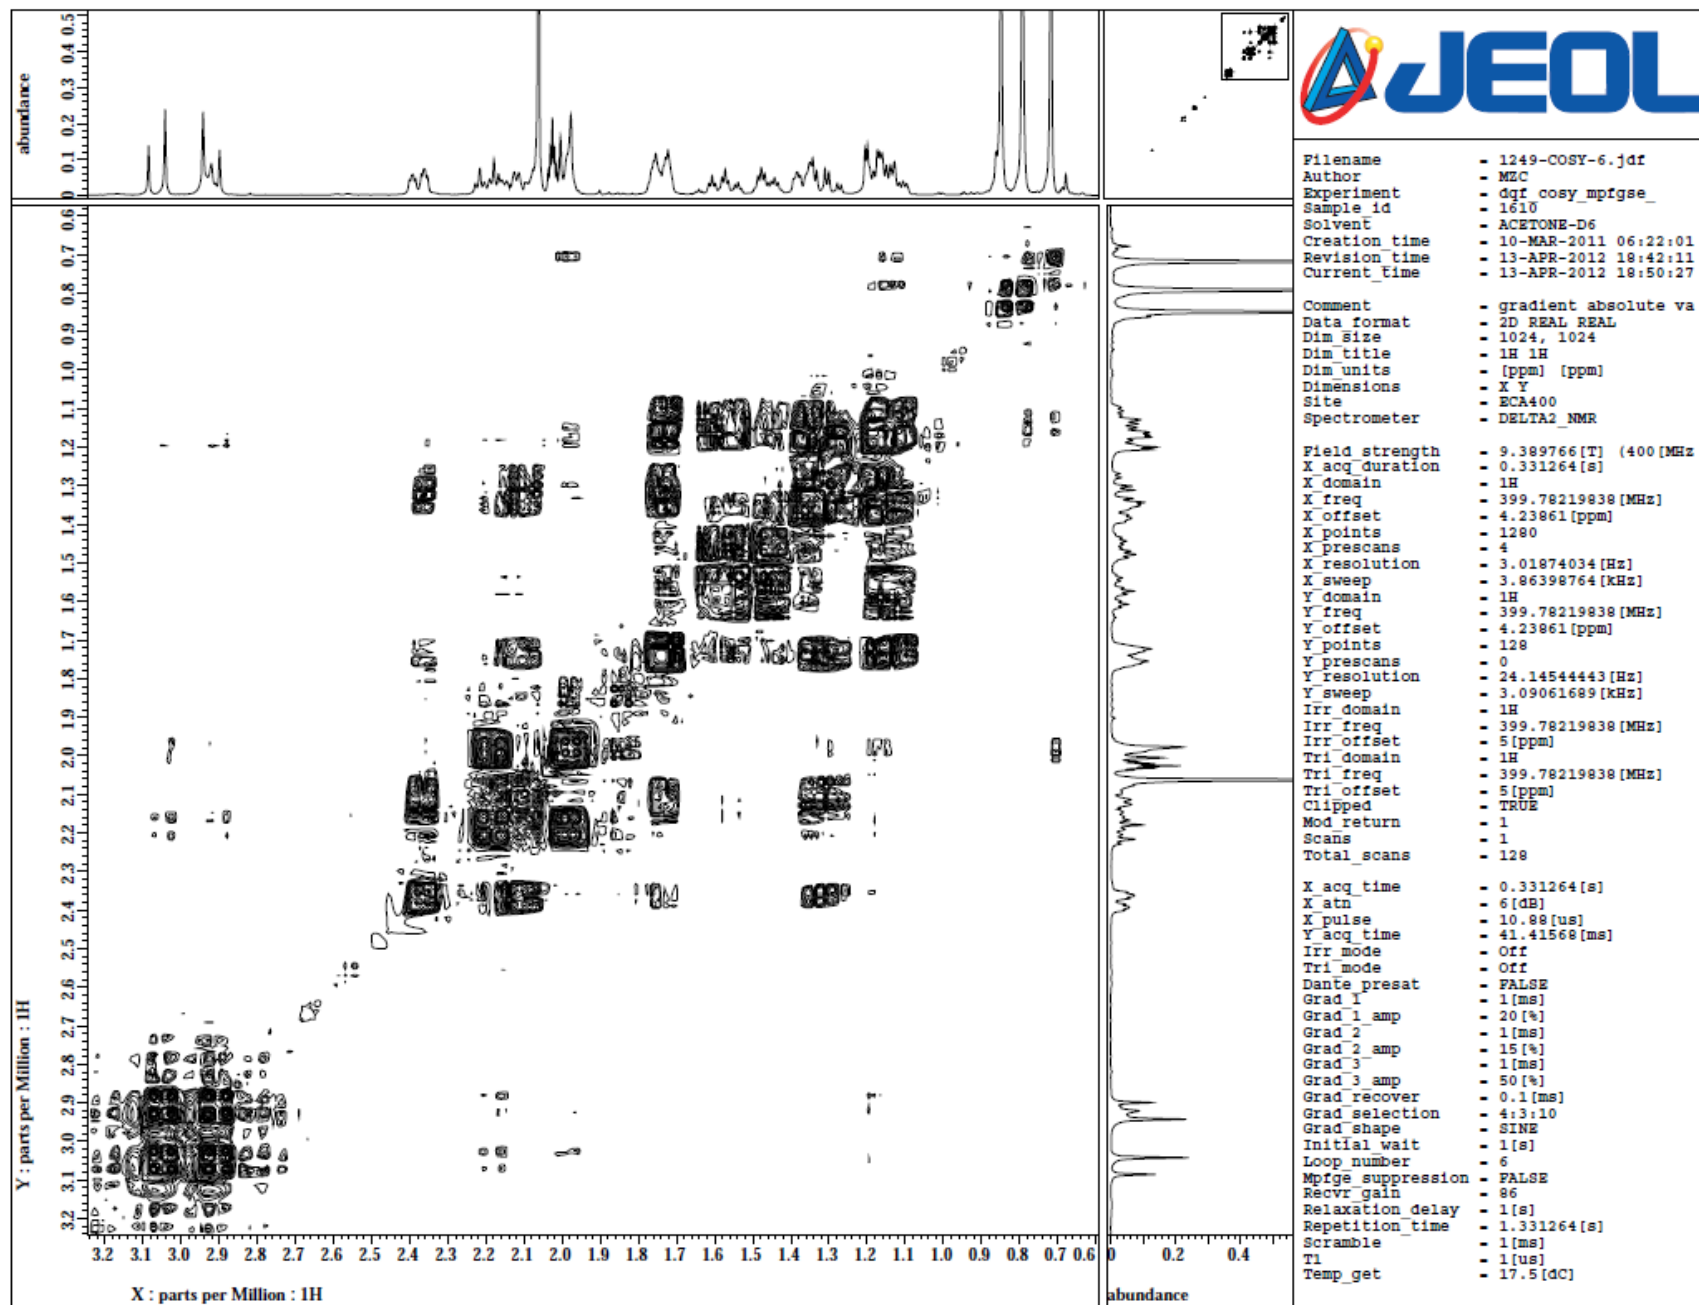



# Expanded $^1\text{H}$ - $^1\text{H}$ COSY Spectrum of **1** in Acetone- $d_6$

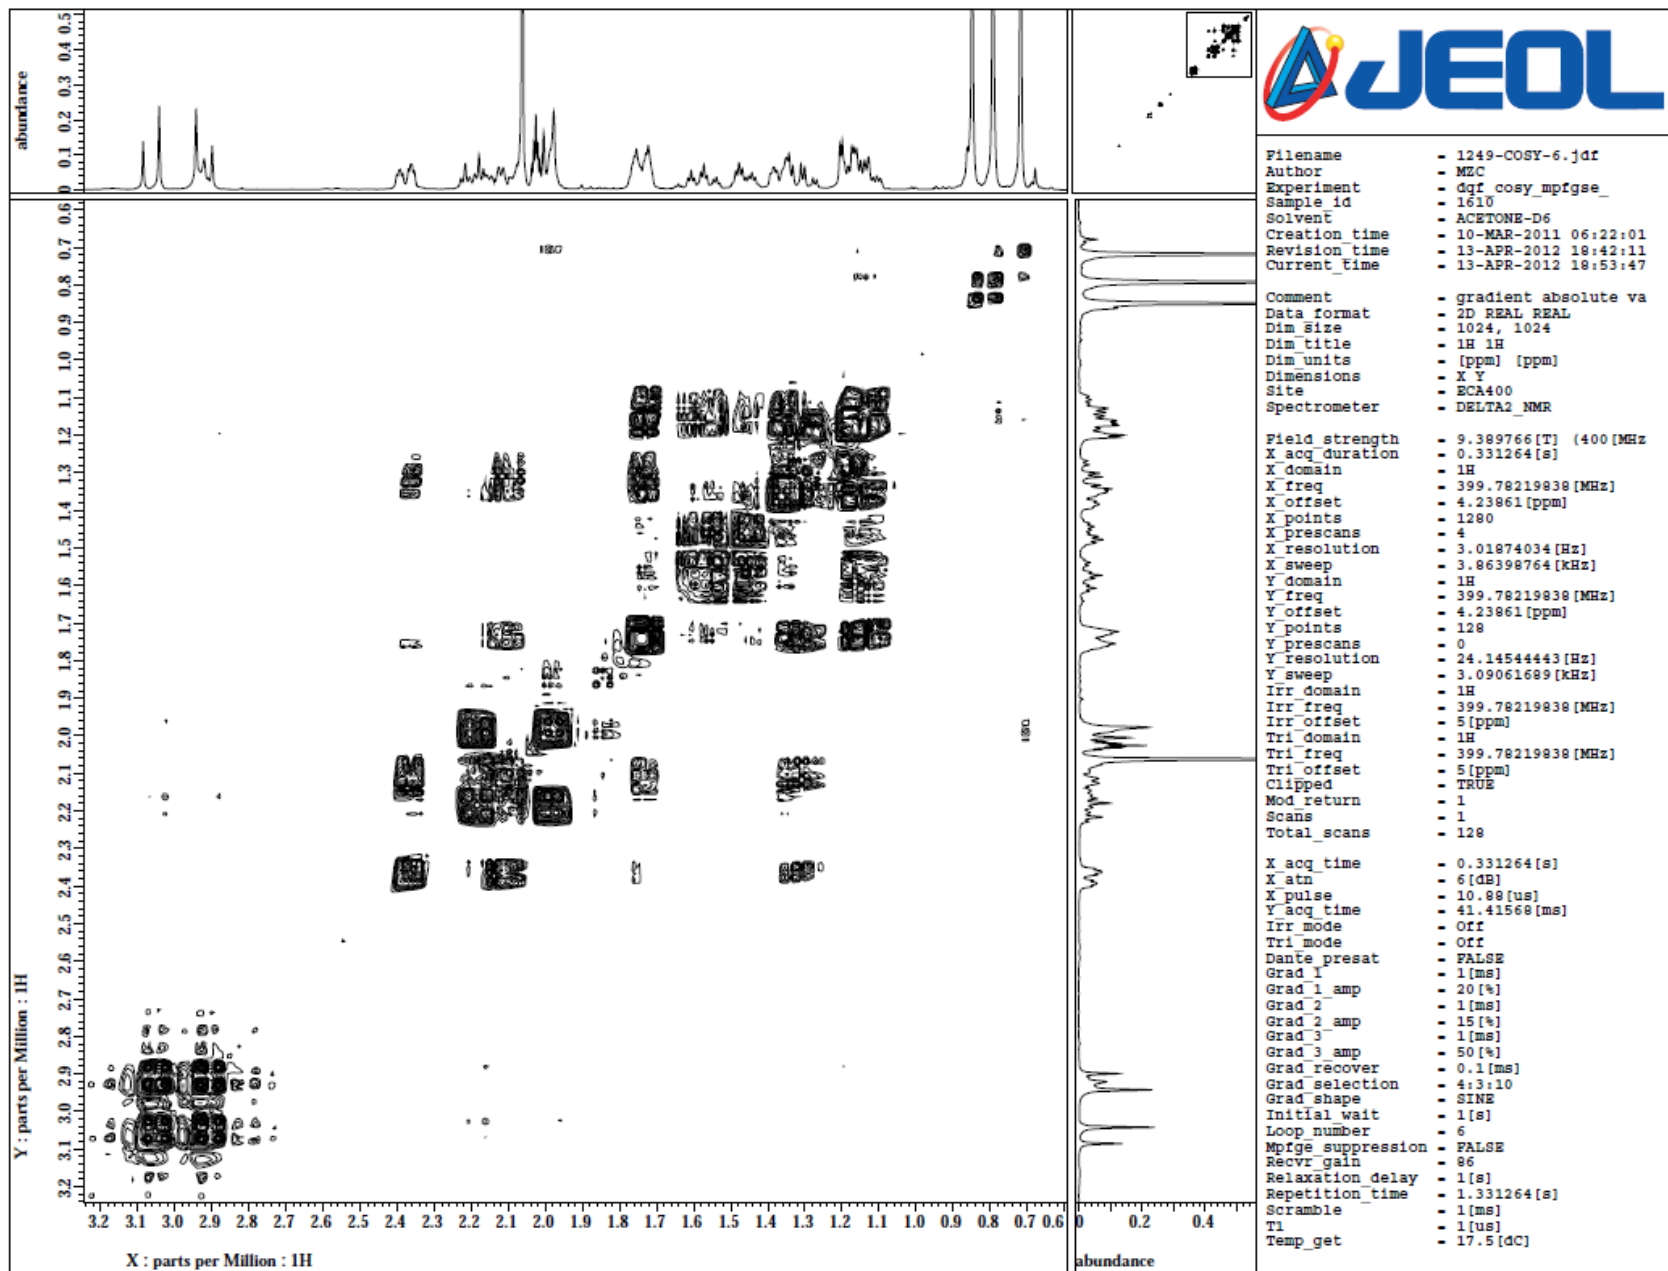

HMQC Spectrum of **1** in Acetone- $d_6$

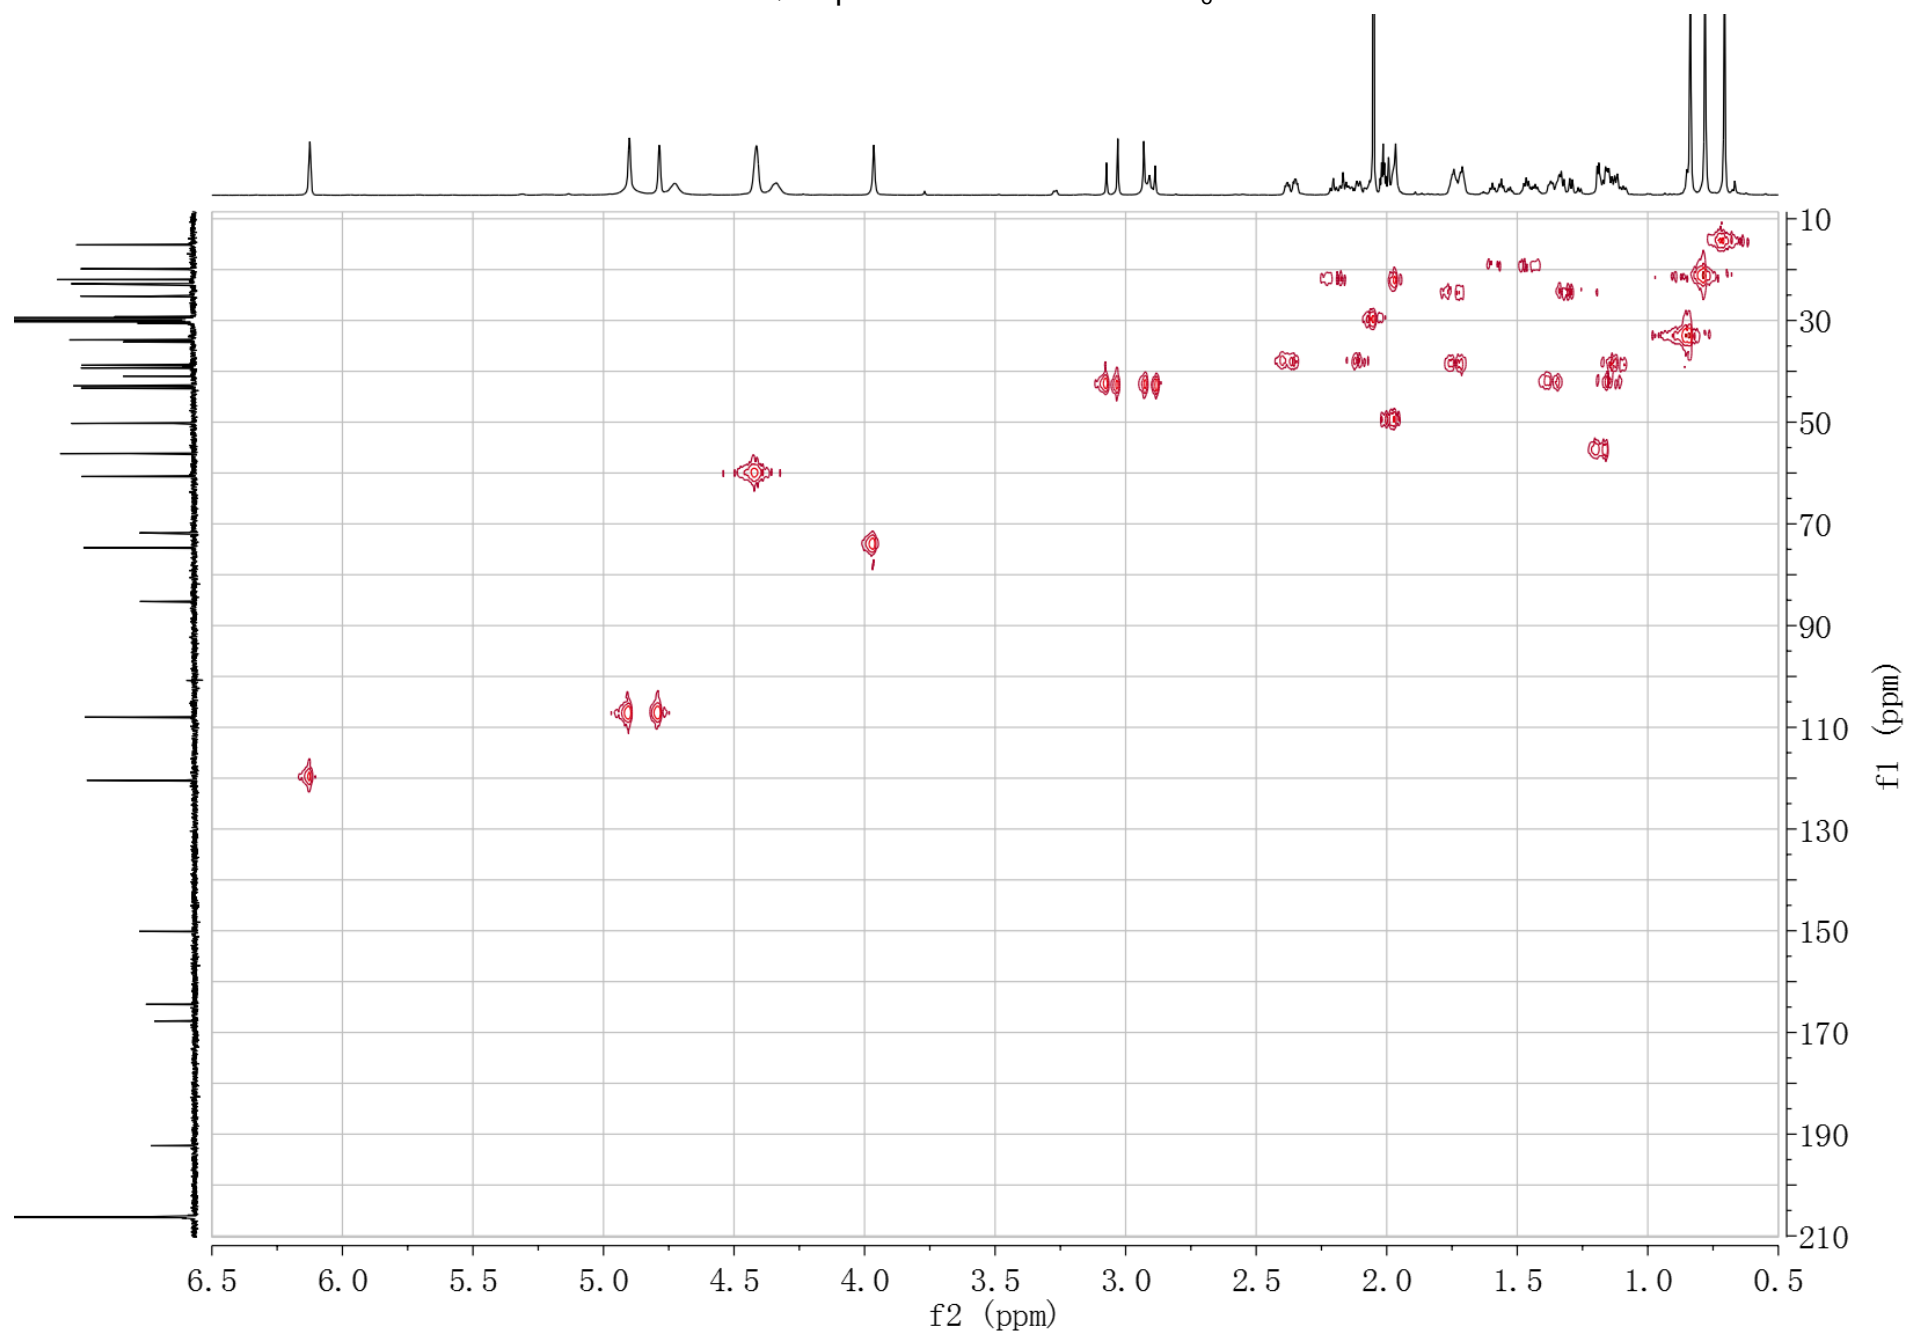

Expanded HMQC Spectrum of **1** in Acetone- $d_6$

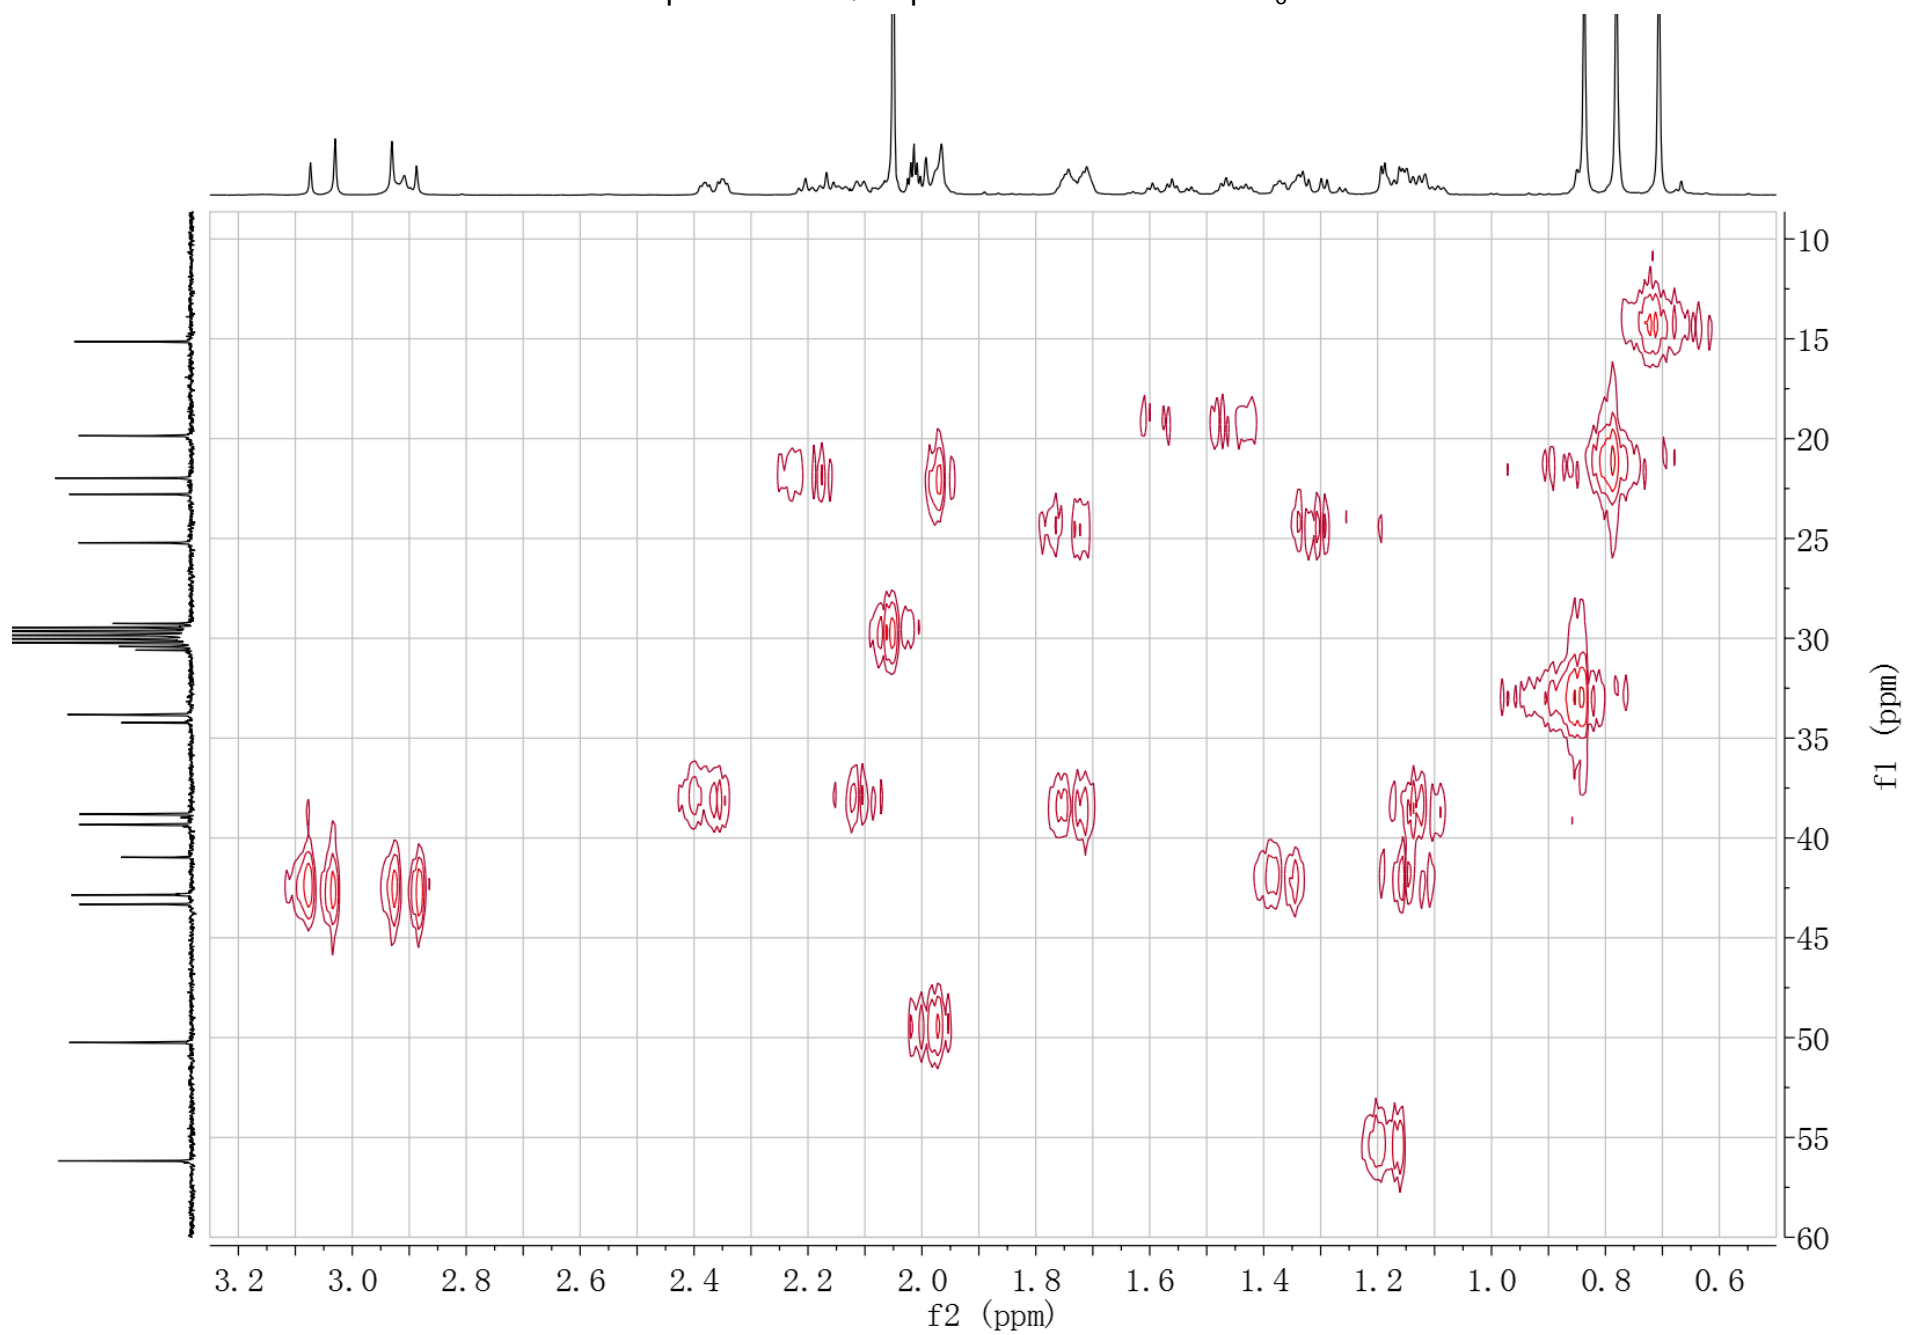

Expanded HMQC Spectrum of **1** in Acetone- $d_6$

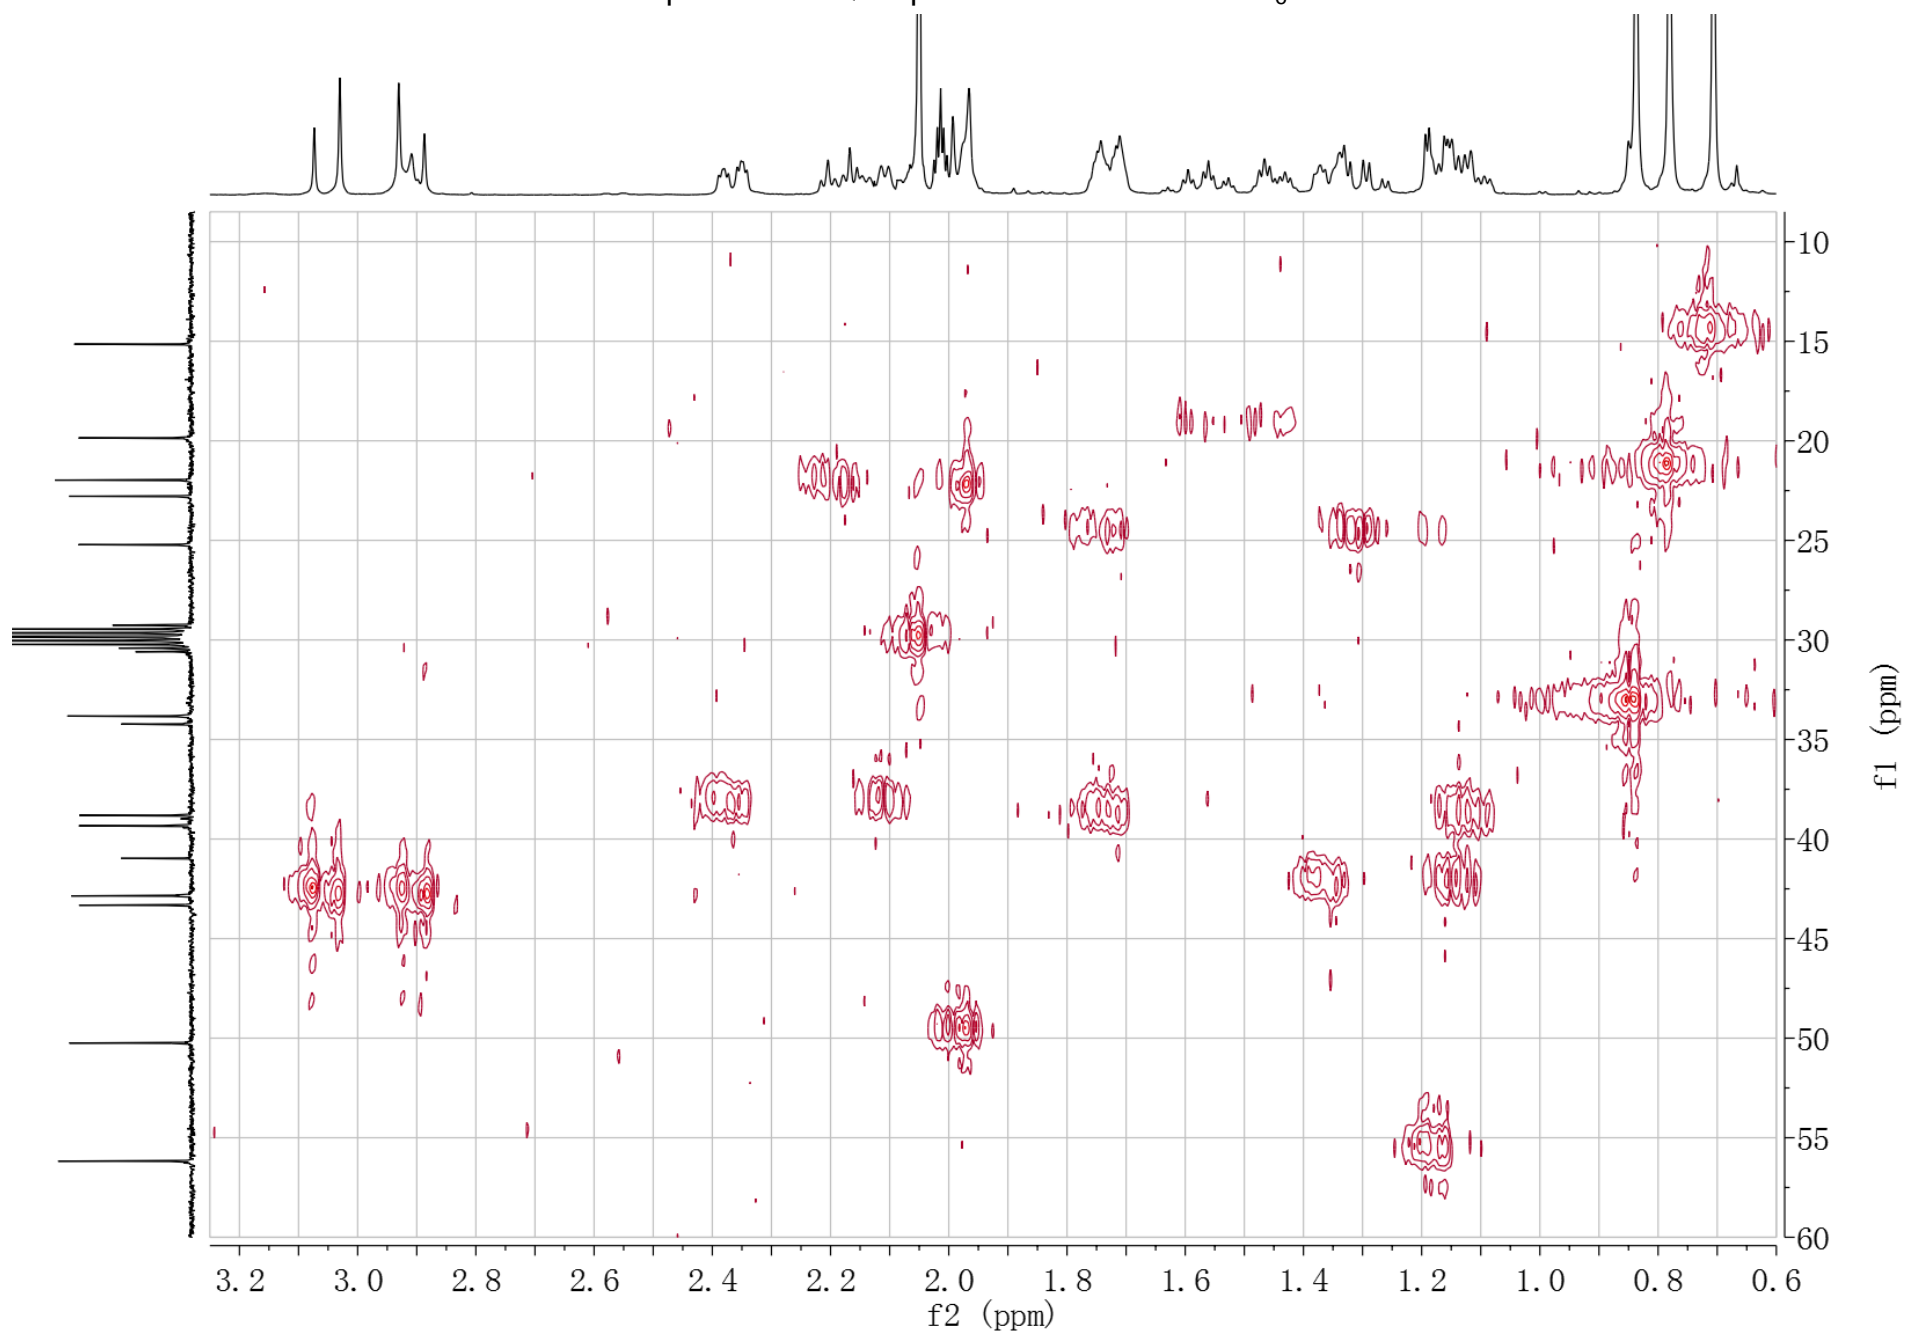

HMBC Spectrum of **1** in Acetone- $d_6$

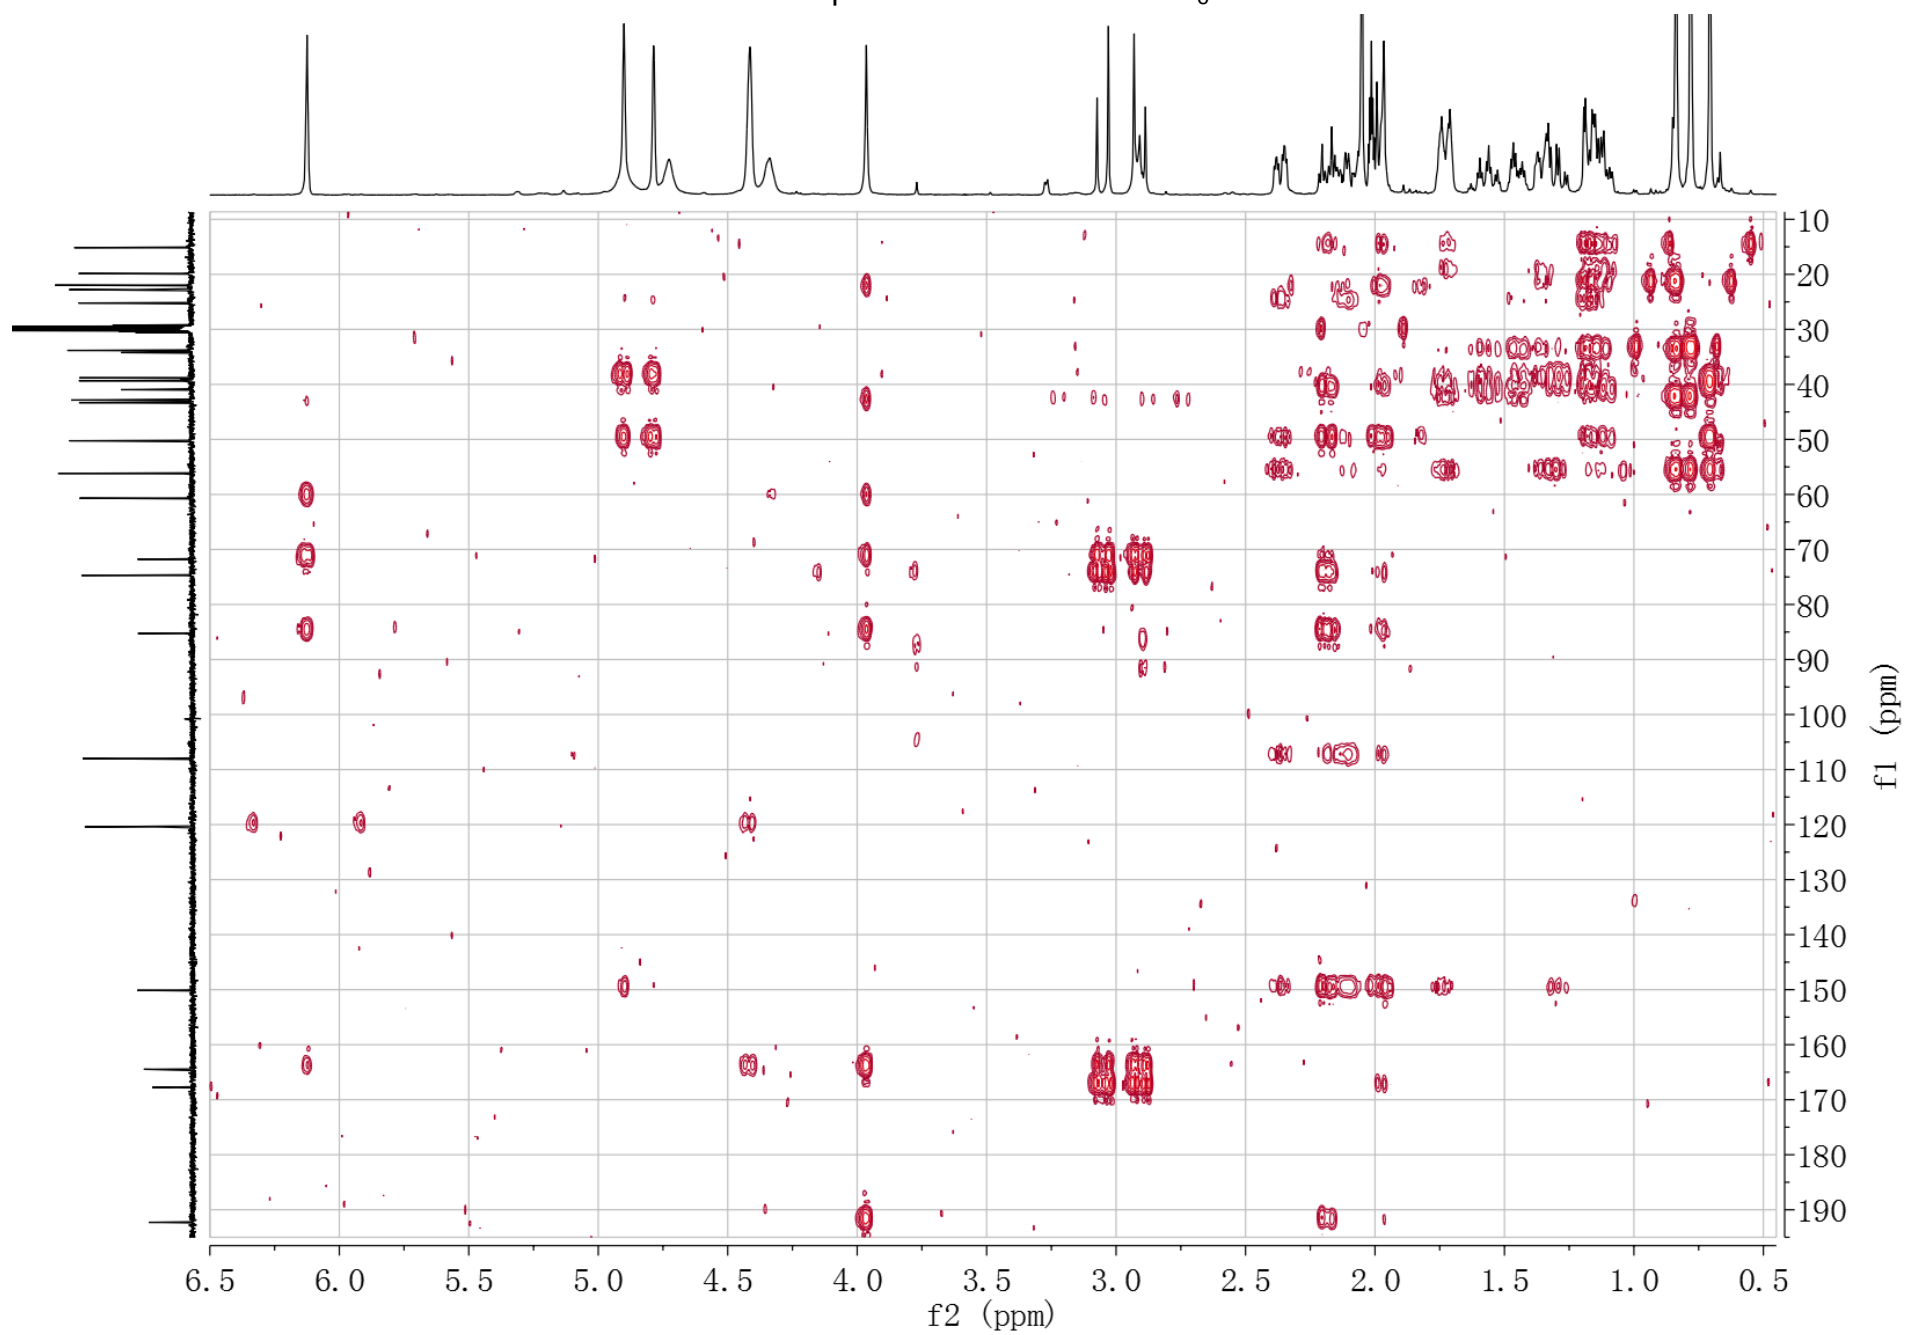

Expanded HMBC Spectrum of **1** in Acetone- $d_6$

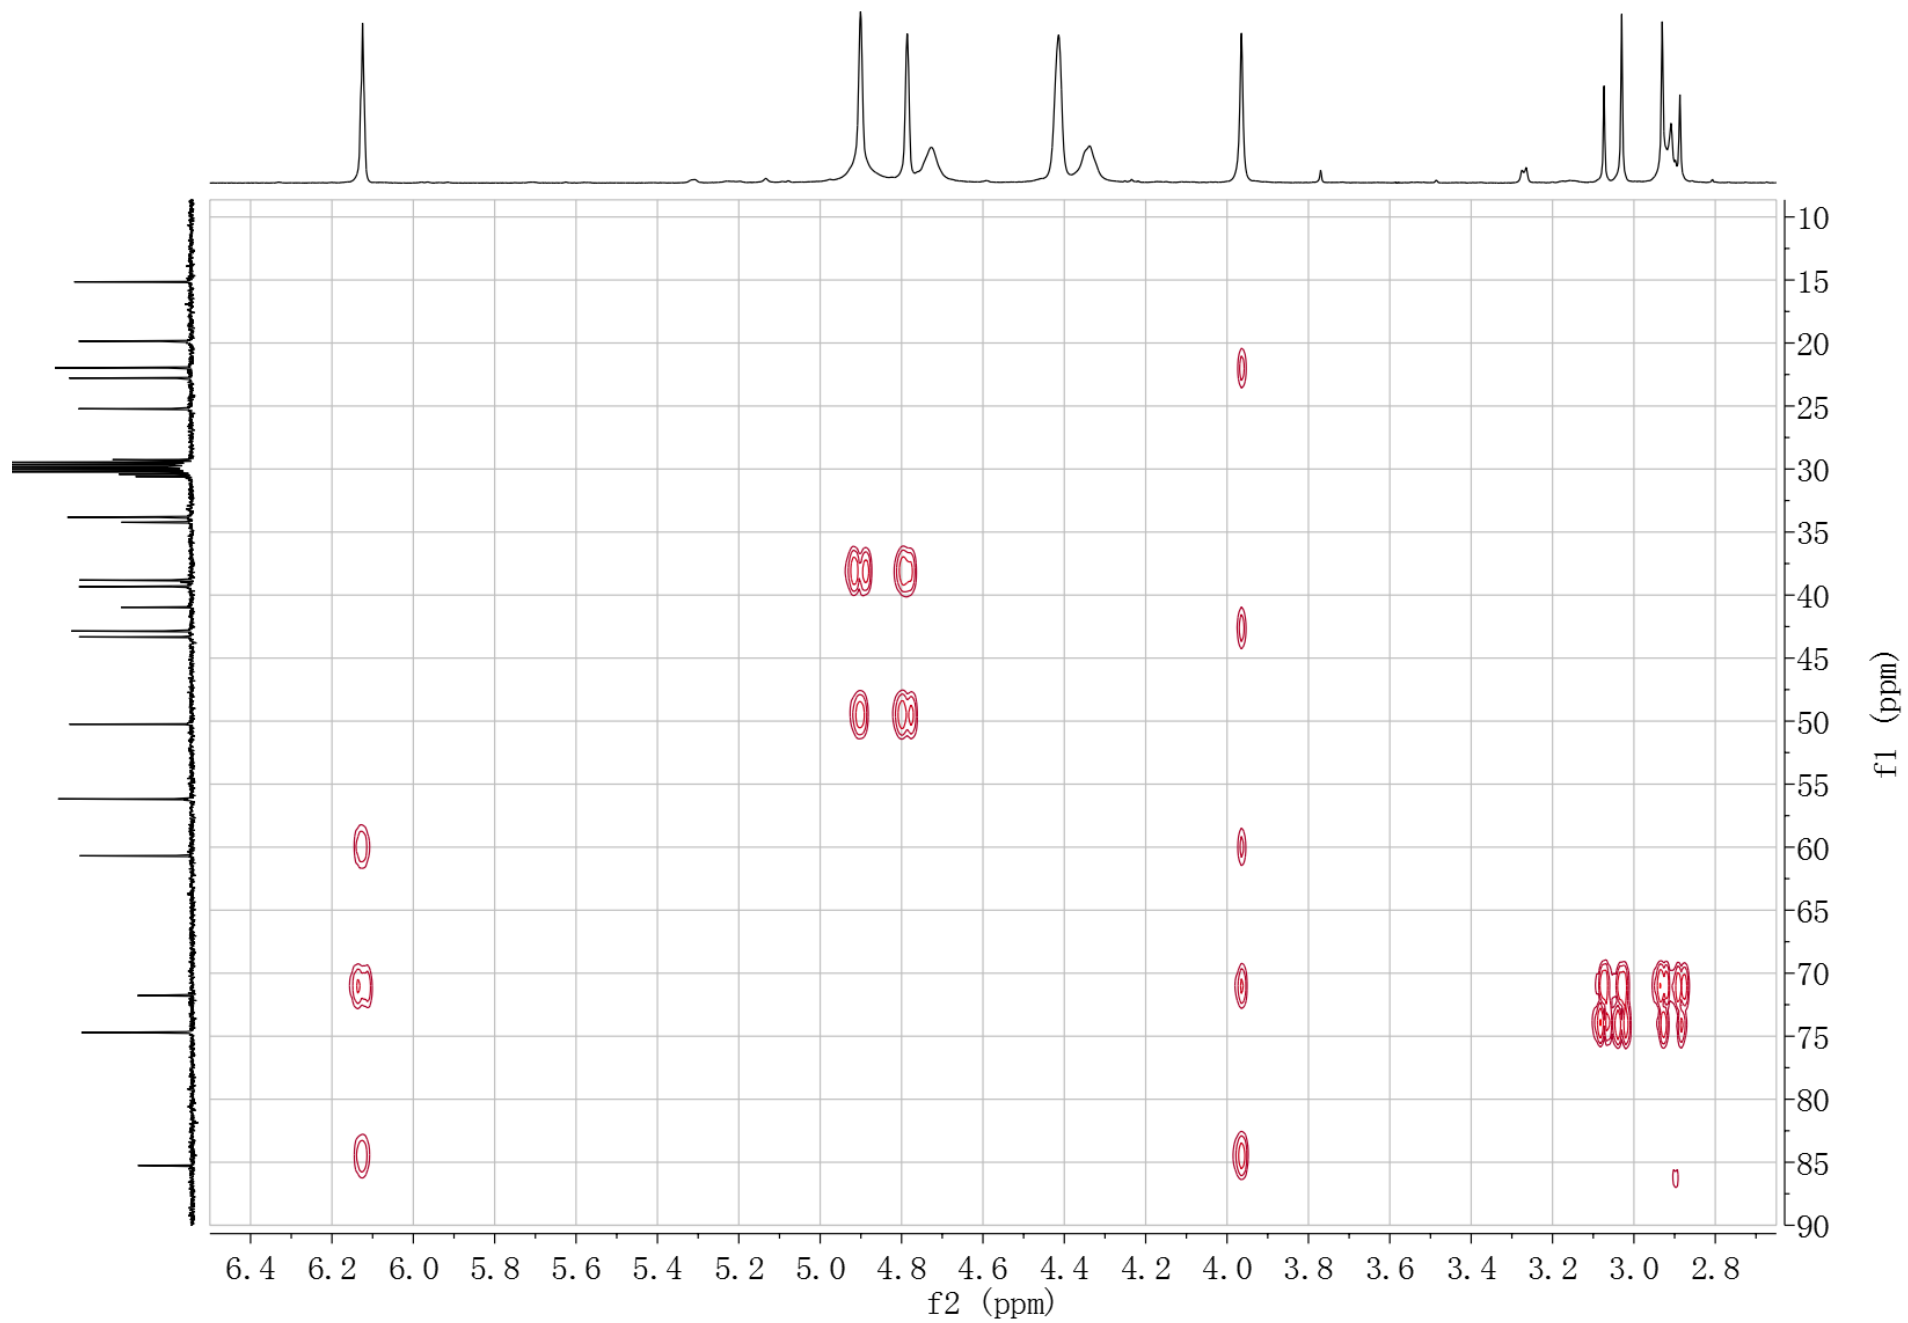

Expanded HMBC Spectrum of **1** in Acetone- $d_6$

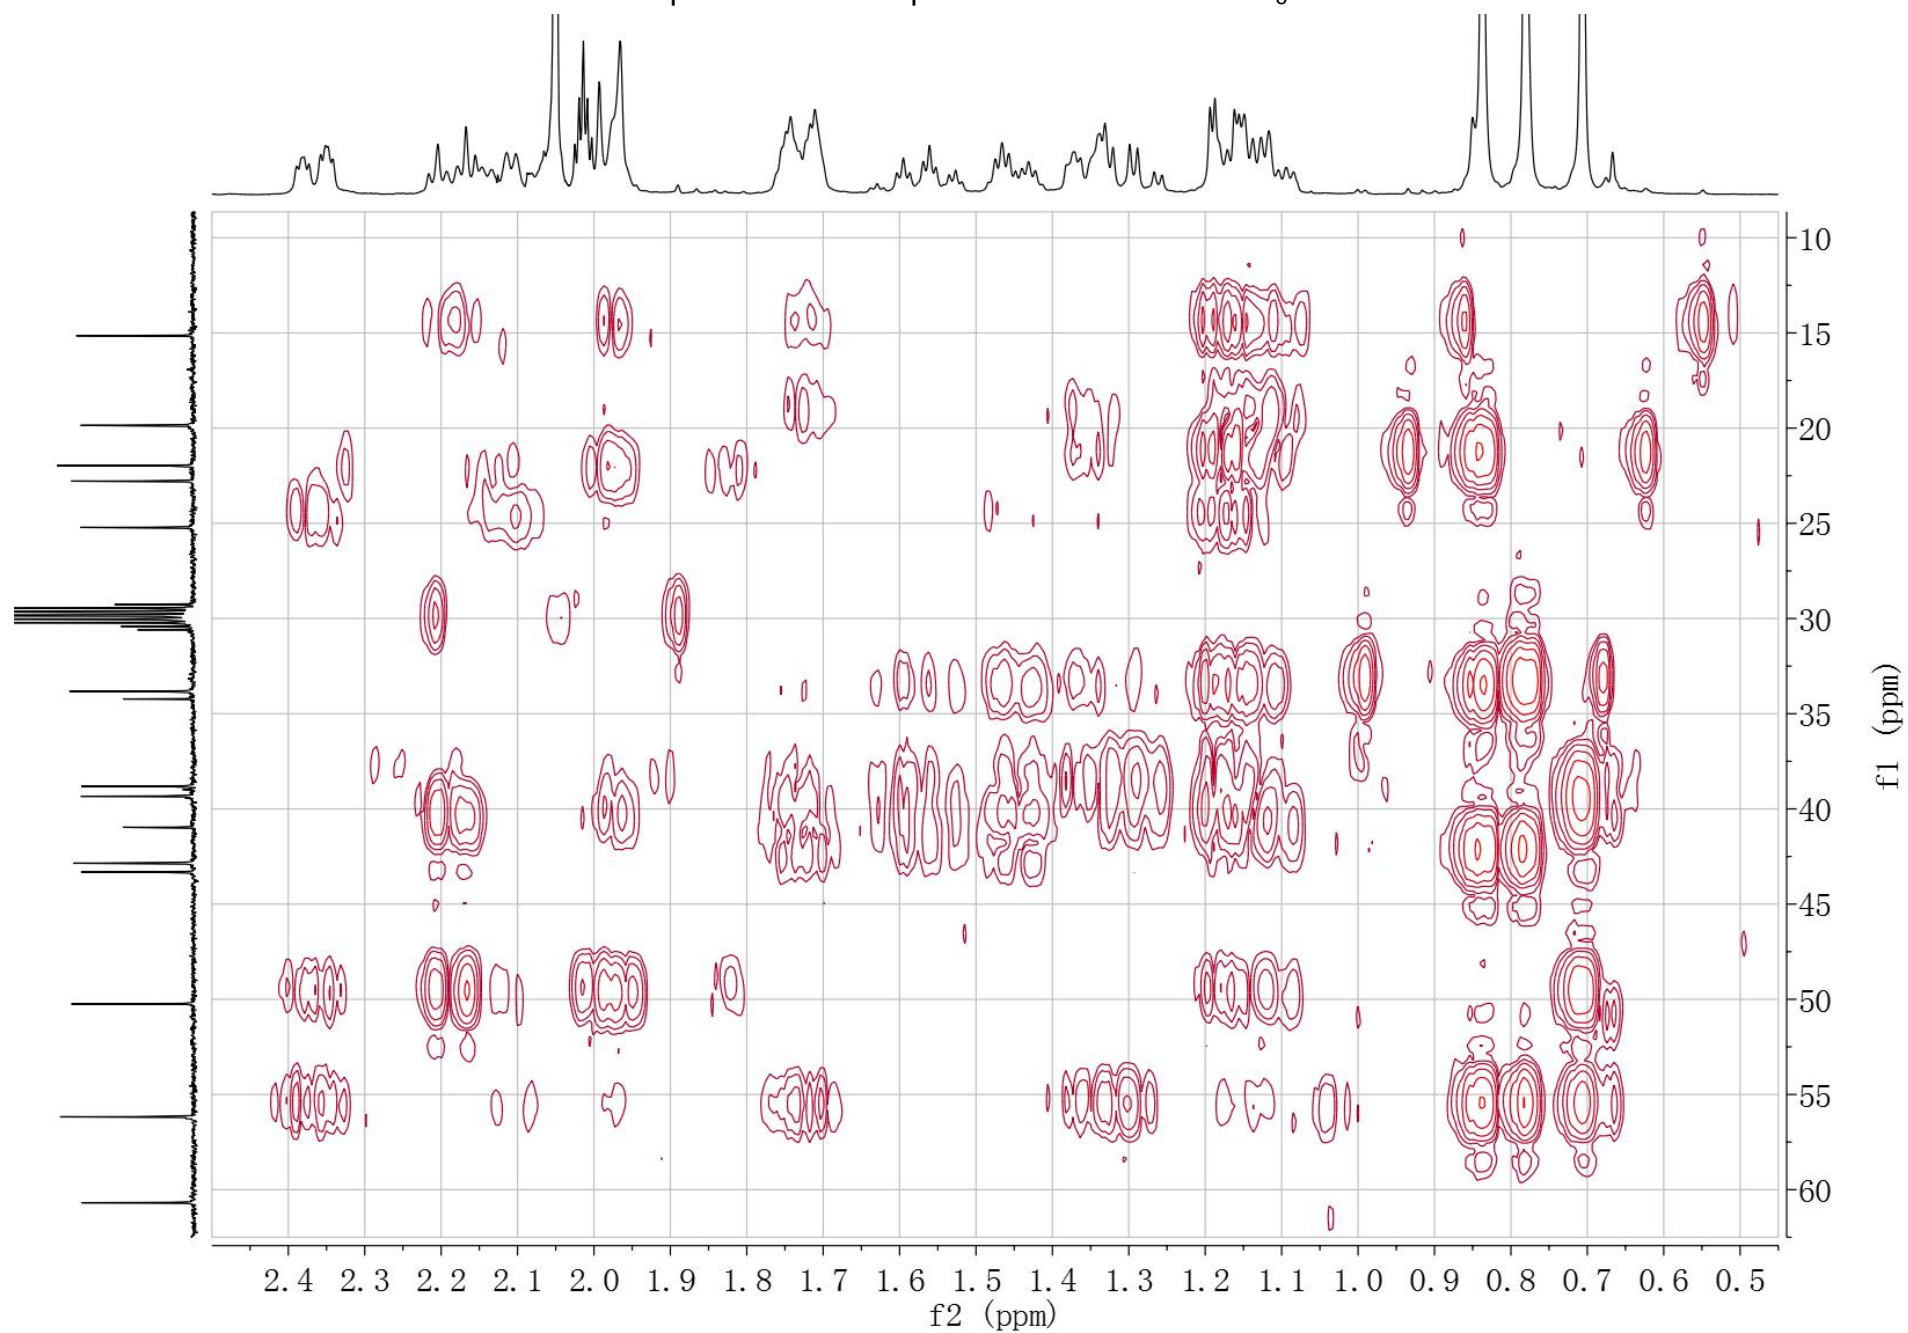



# NOESY Spectrum of 1 in Acetone- $d_6$

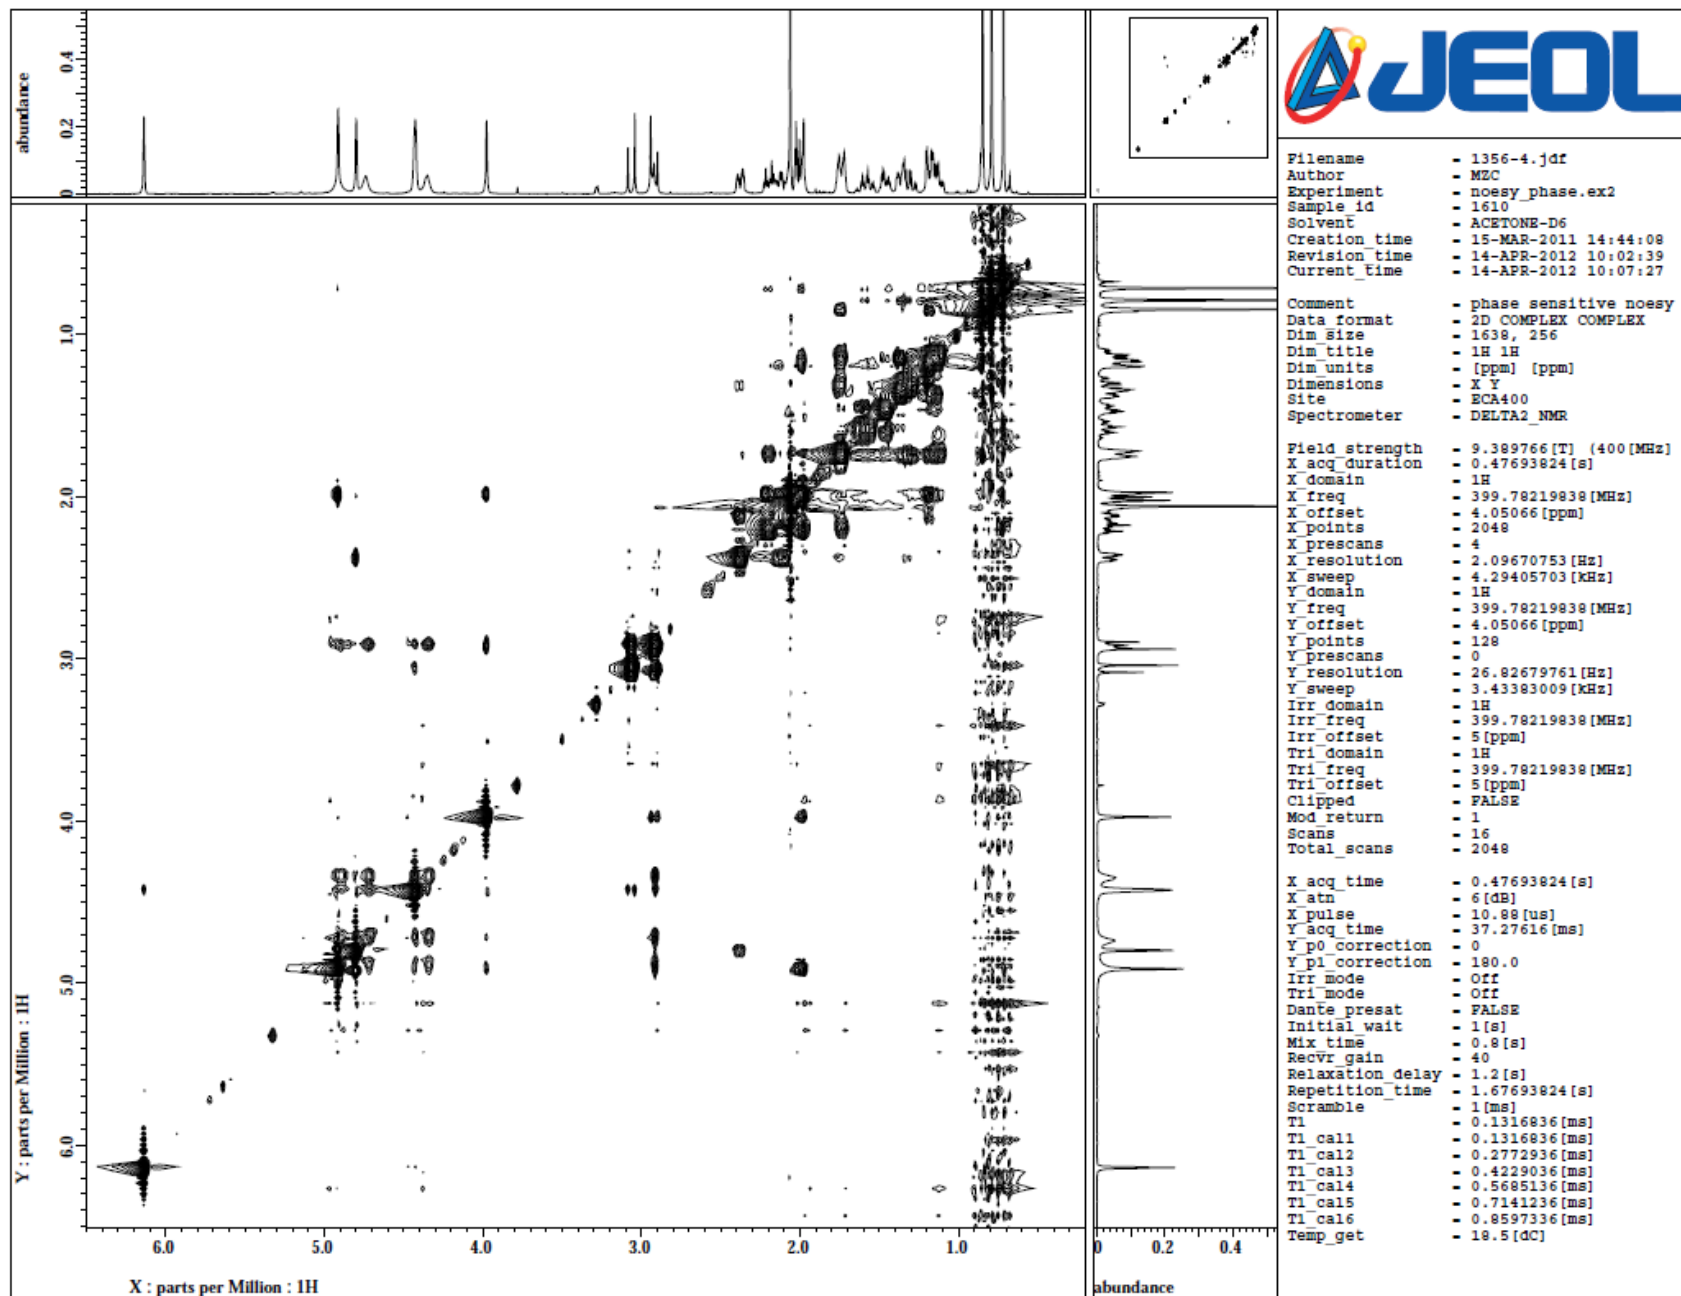



# NOESY Spectrum of 1 in Acetone- $d_6$

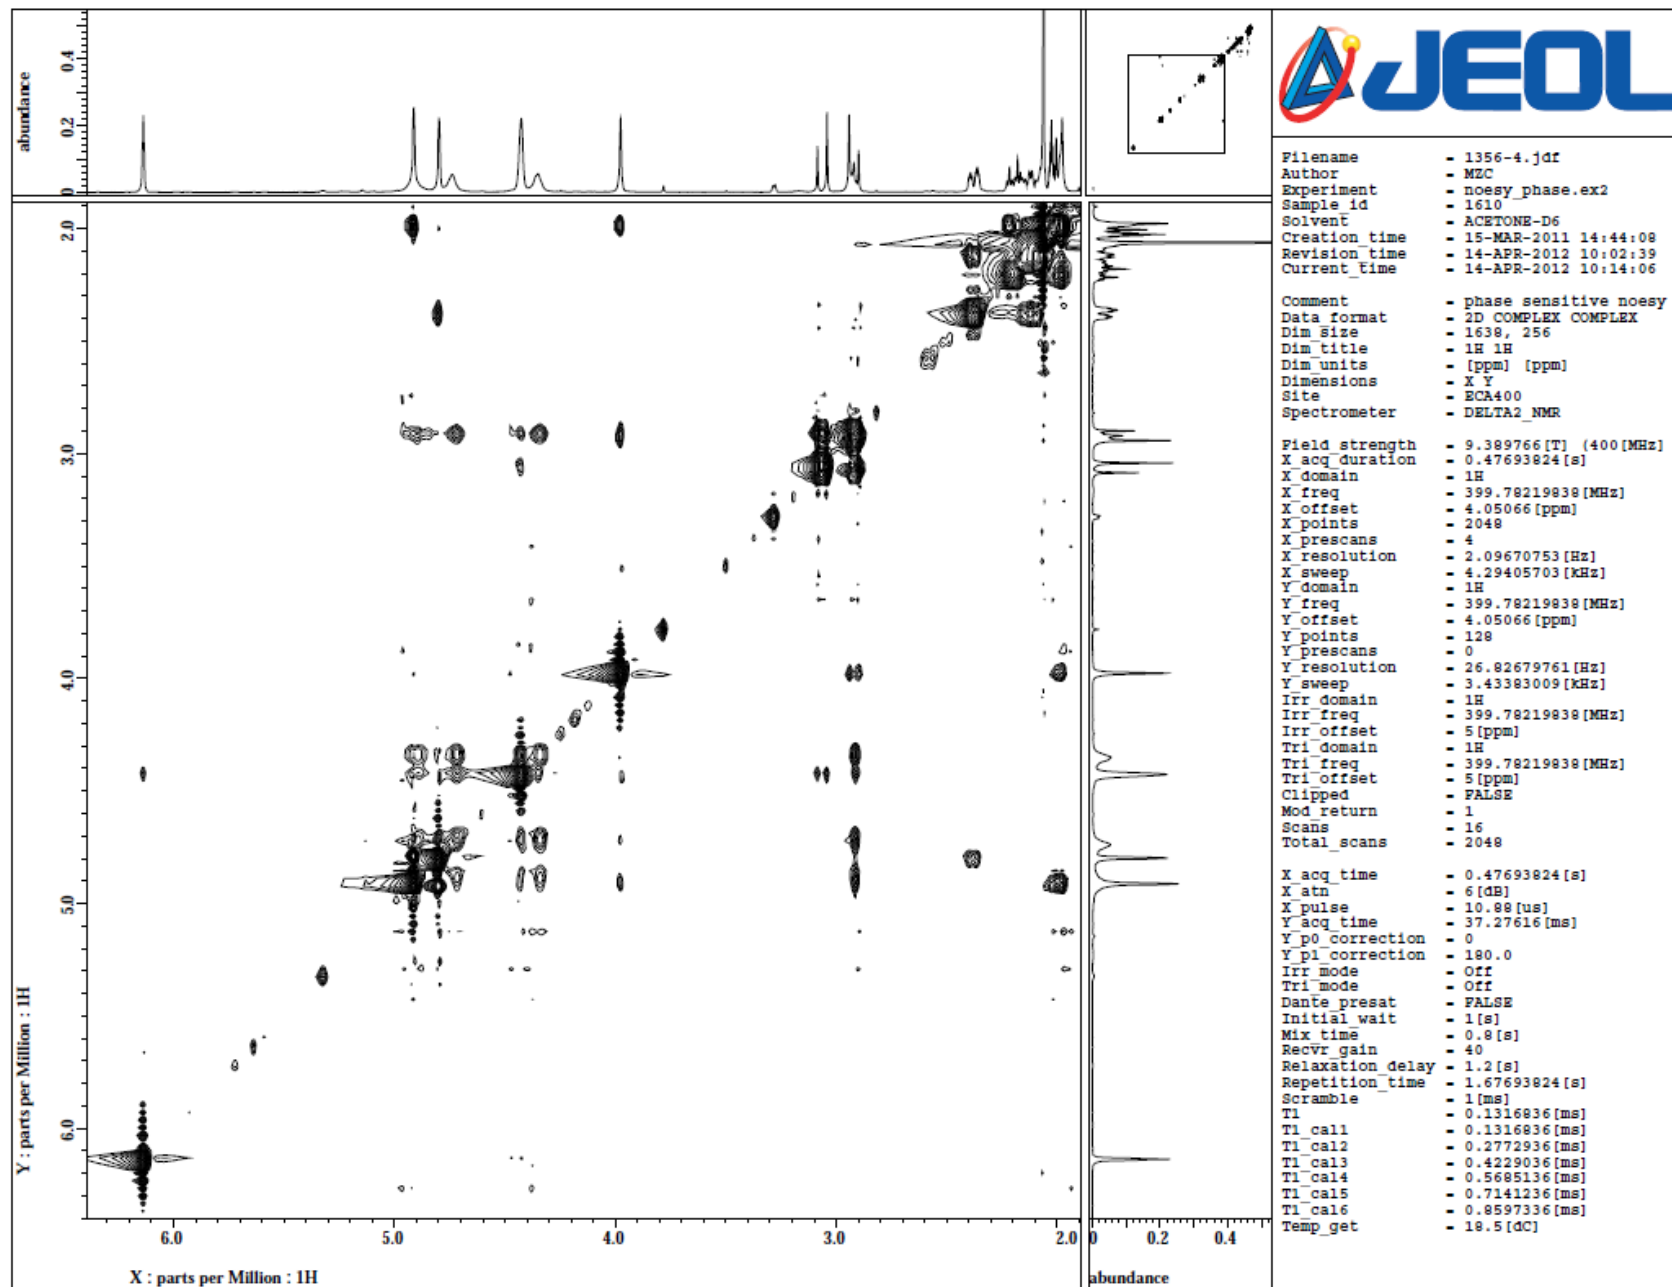

# NOESY Spectrum of 1 in Acetone- $d_6$

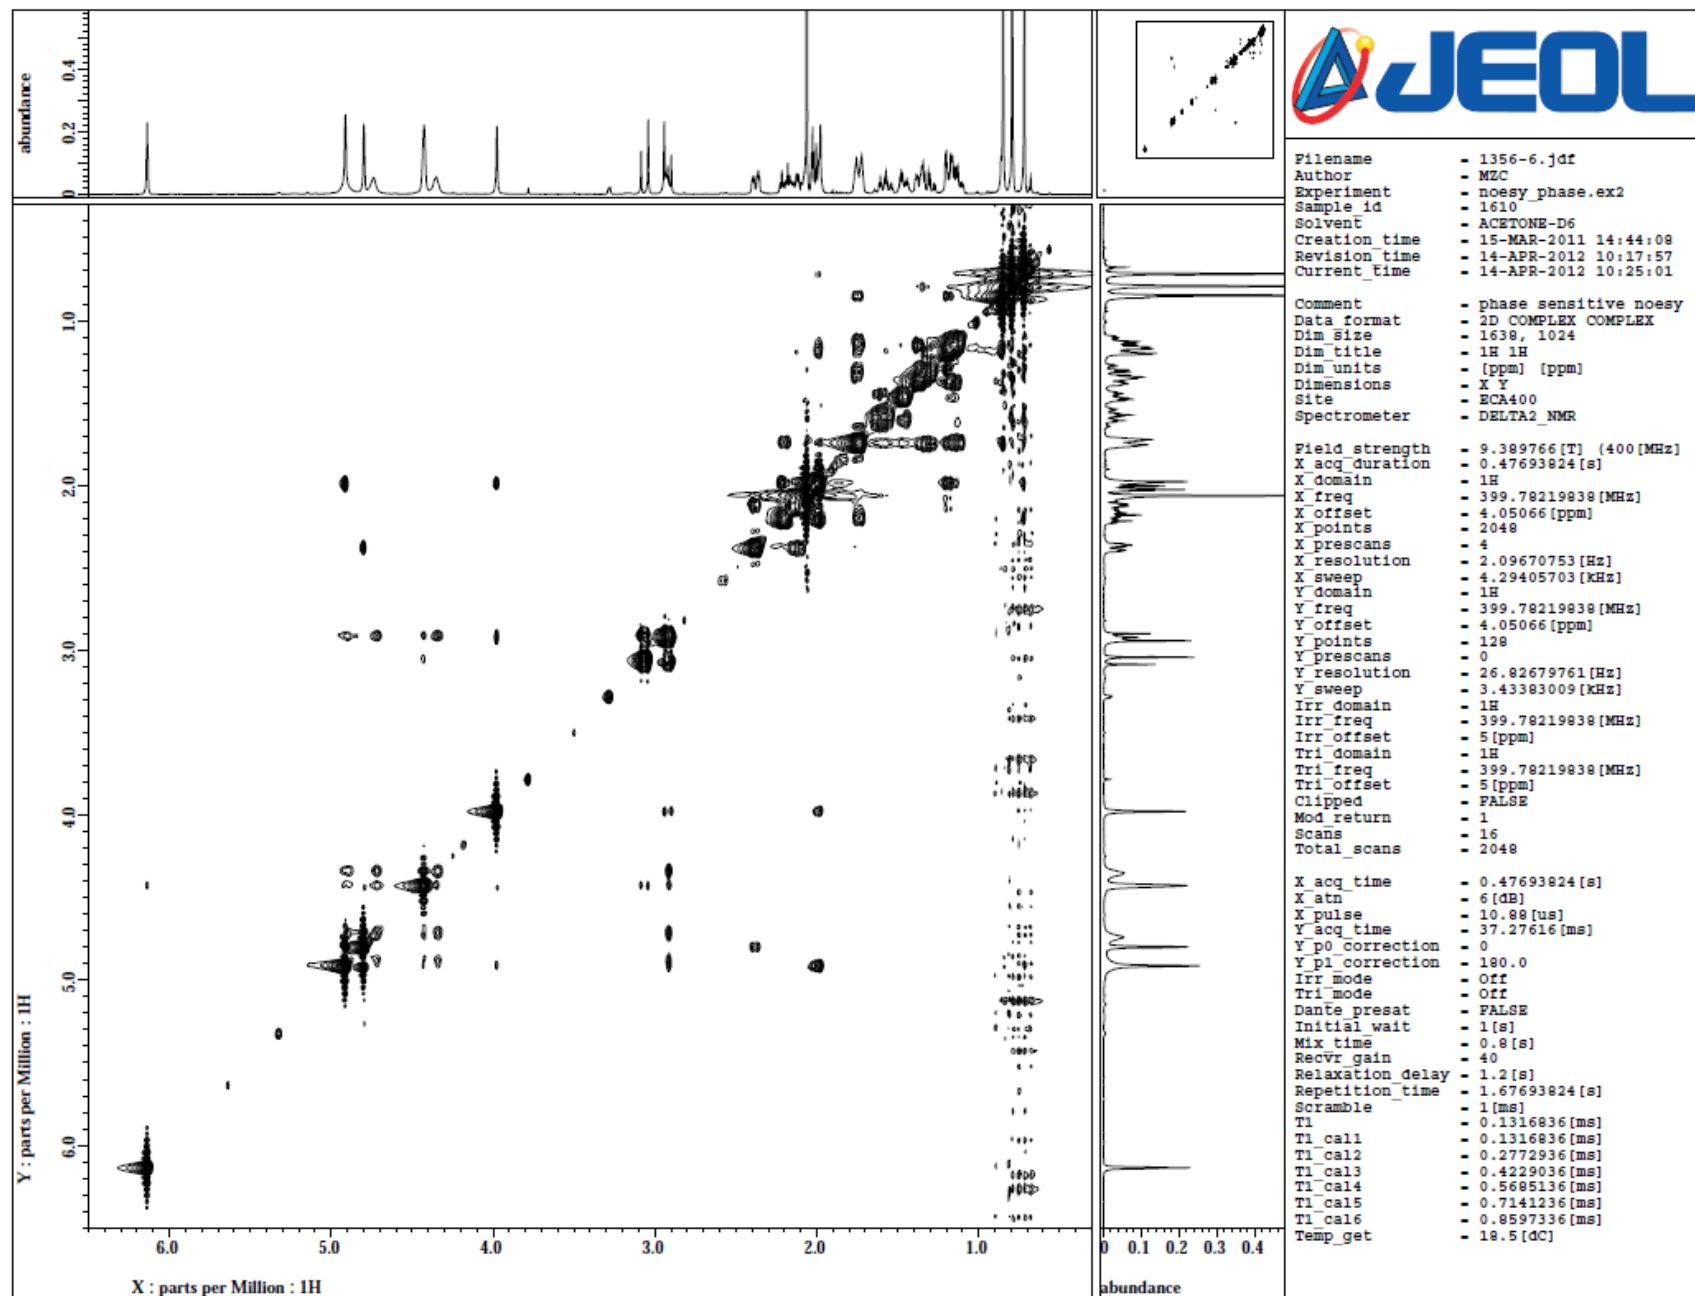

# Expanded NOESY Spectrum of 1 in Acetone- $d_6$

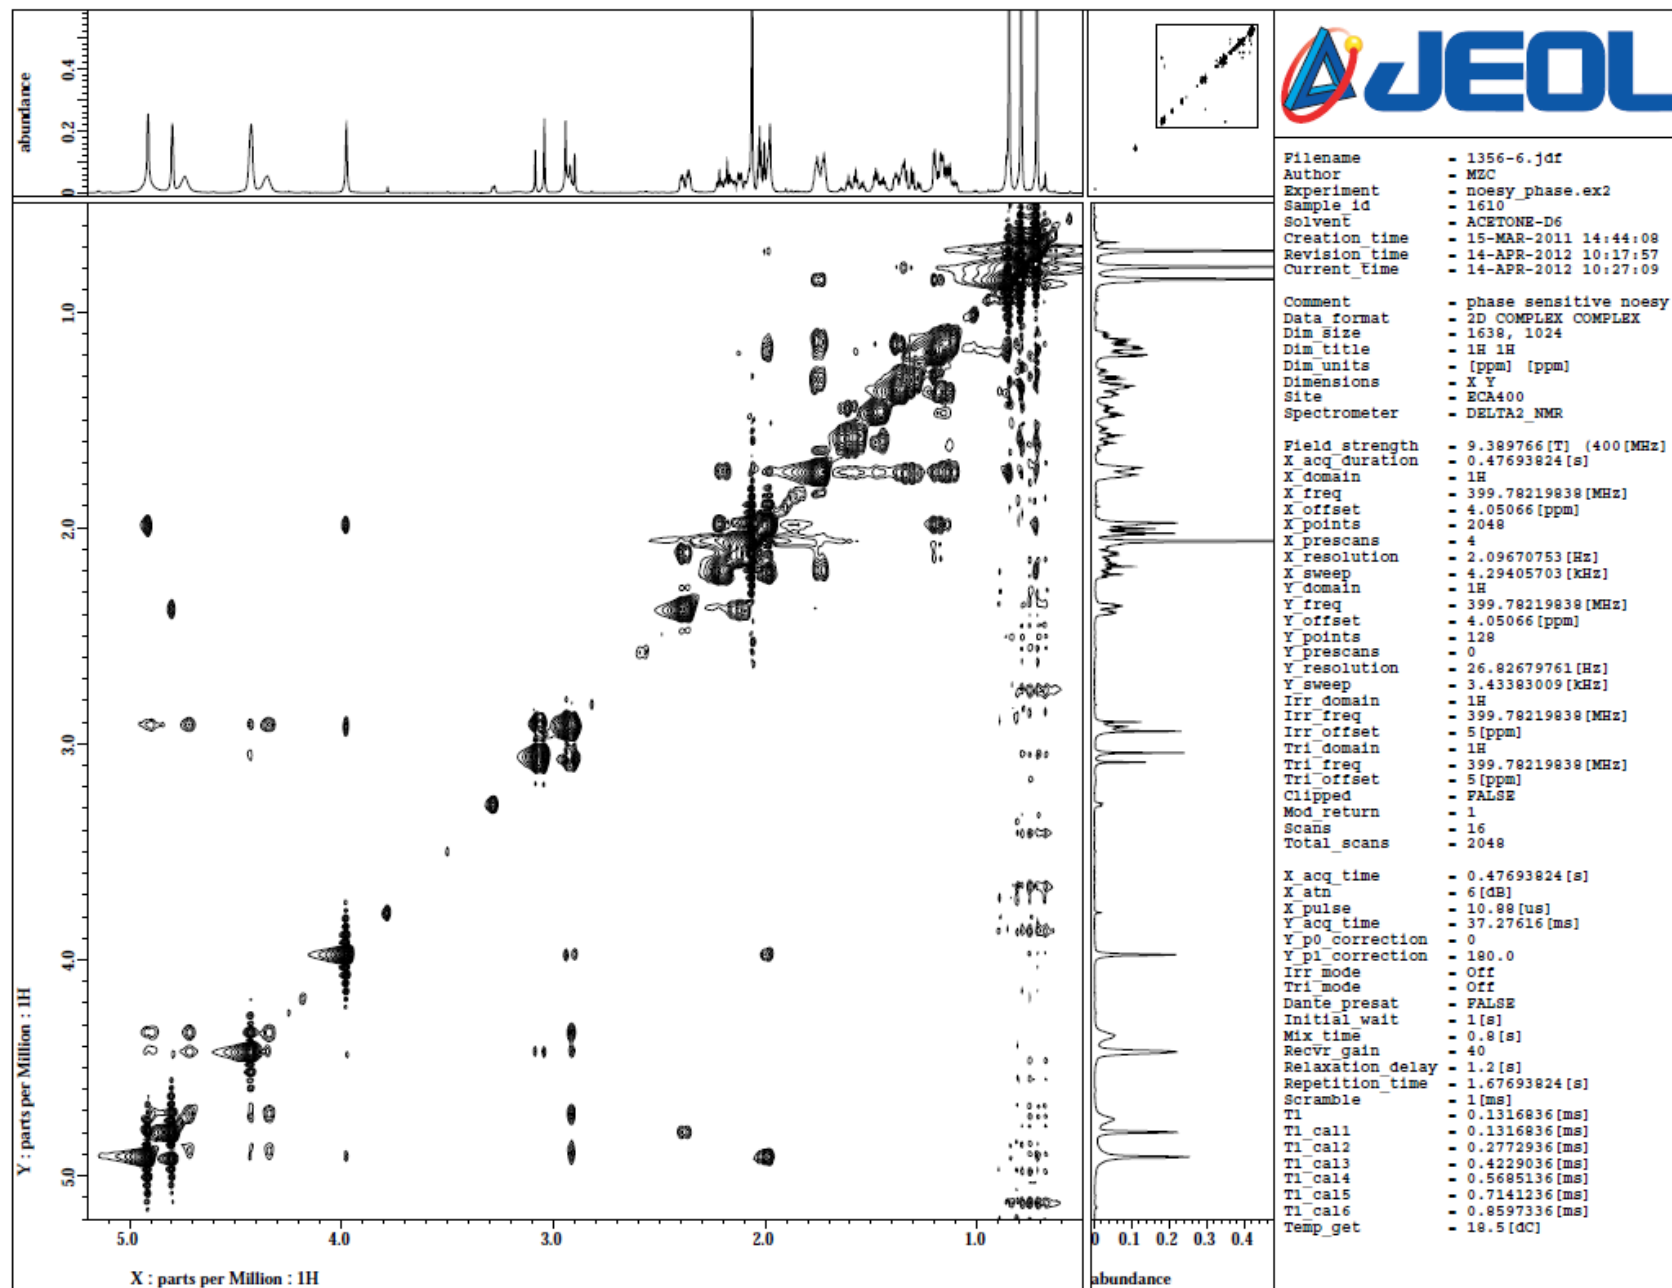

# Expanded NOESY Spectrum of 1 in Acetone- $d_6$

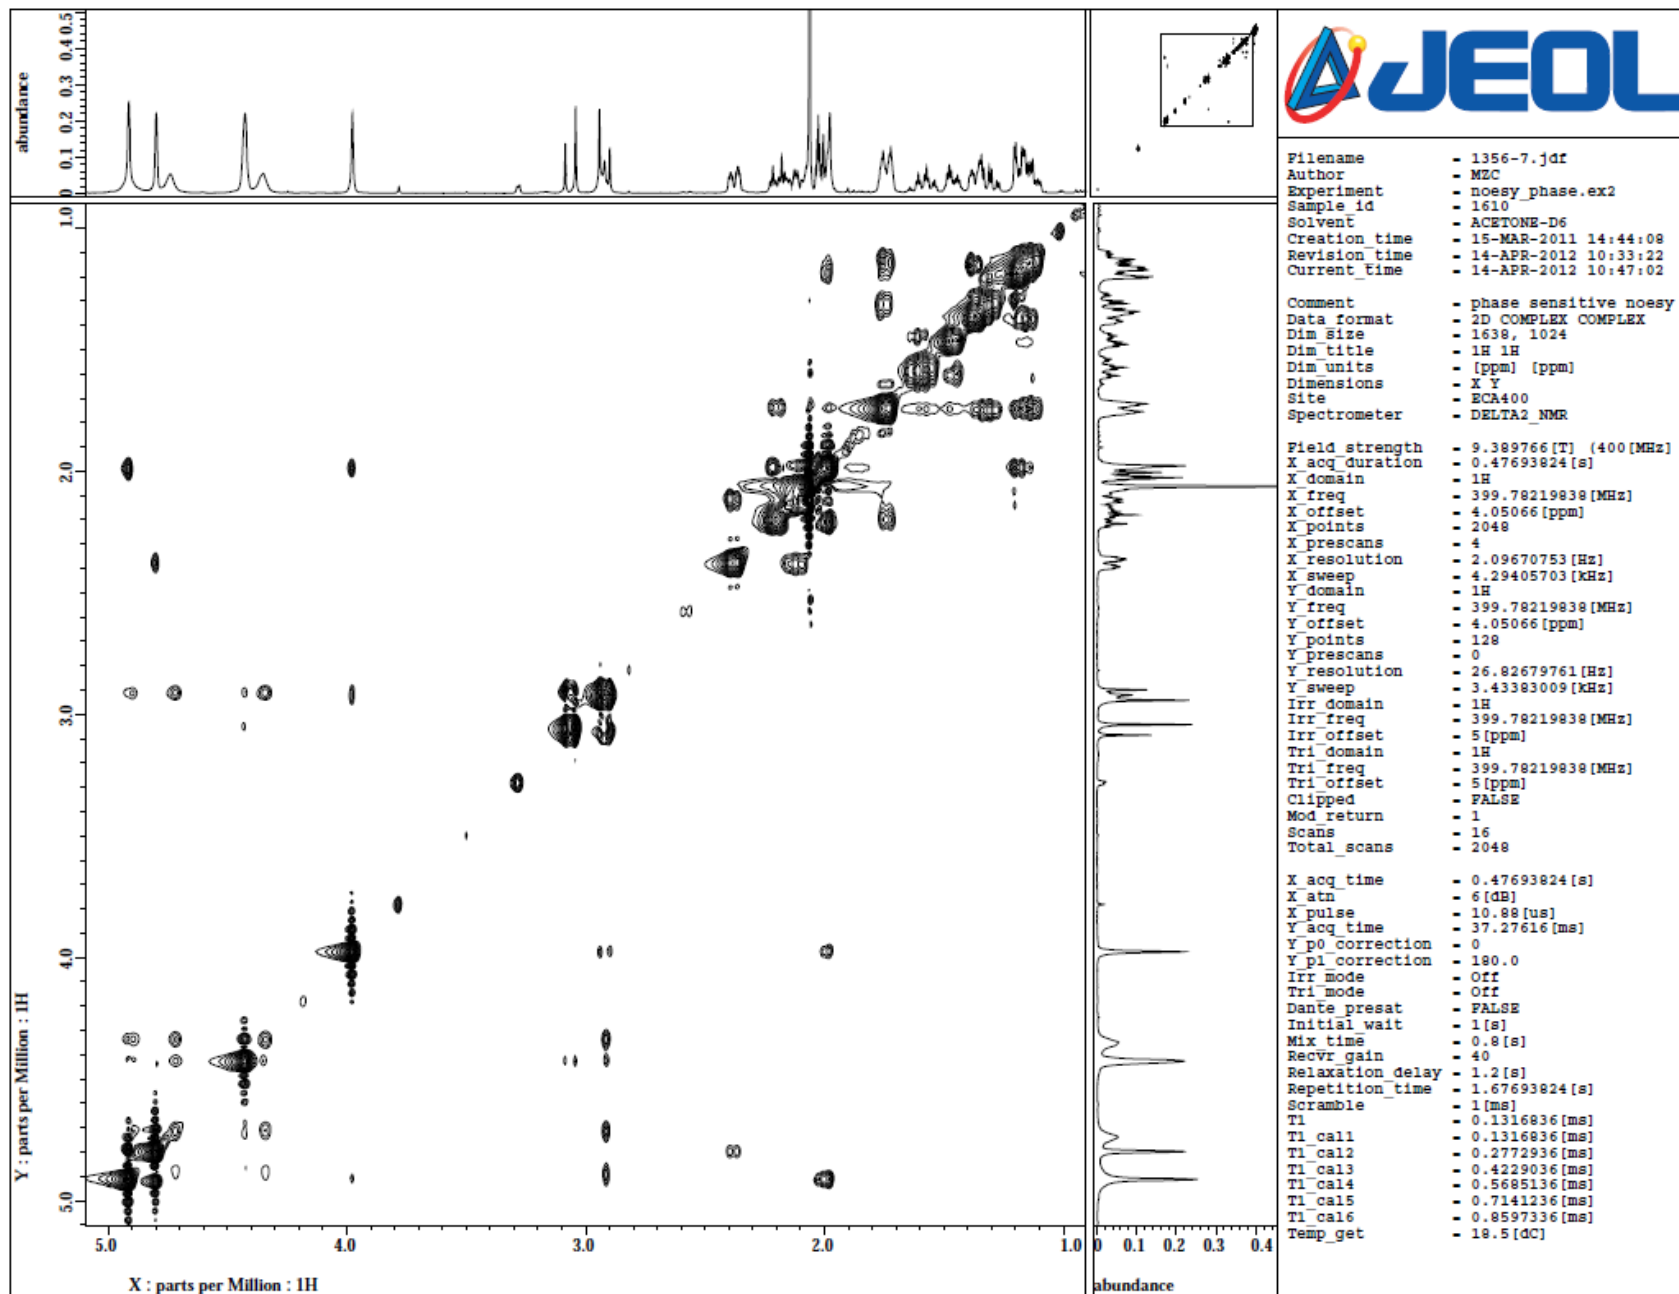

# Expanded NOESY Spectrum of 1 in Acetone- $d_6$

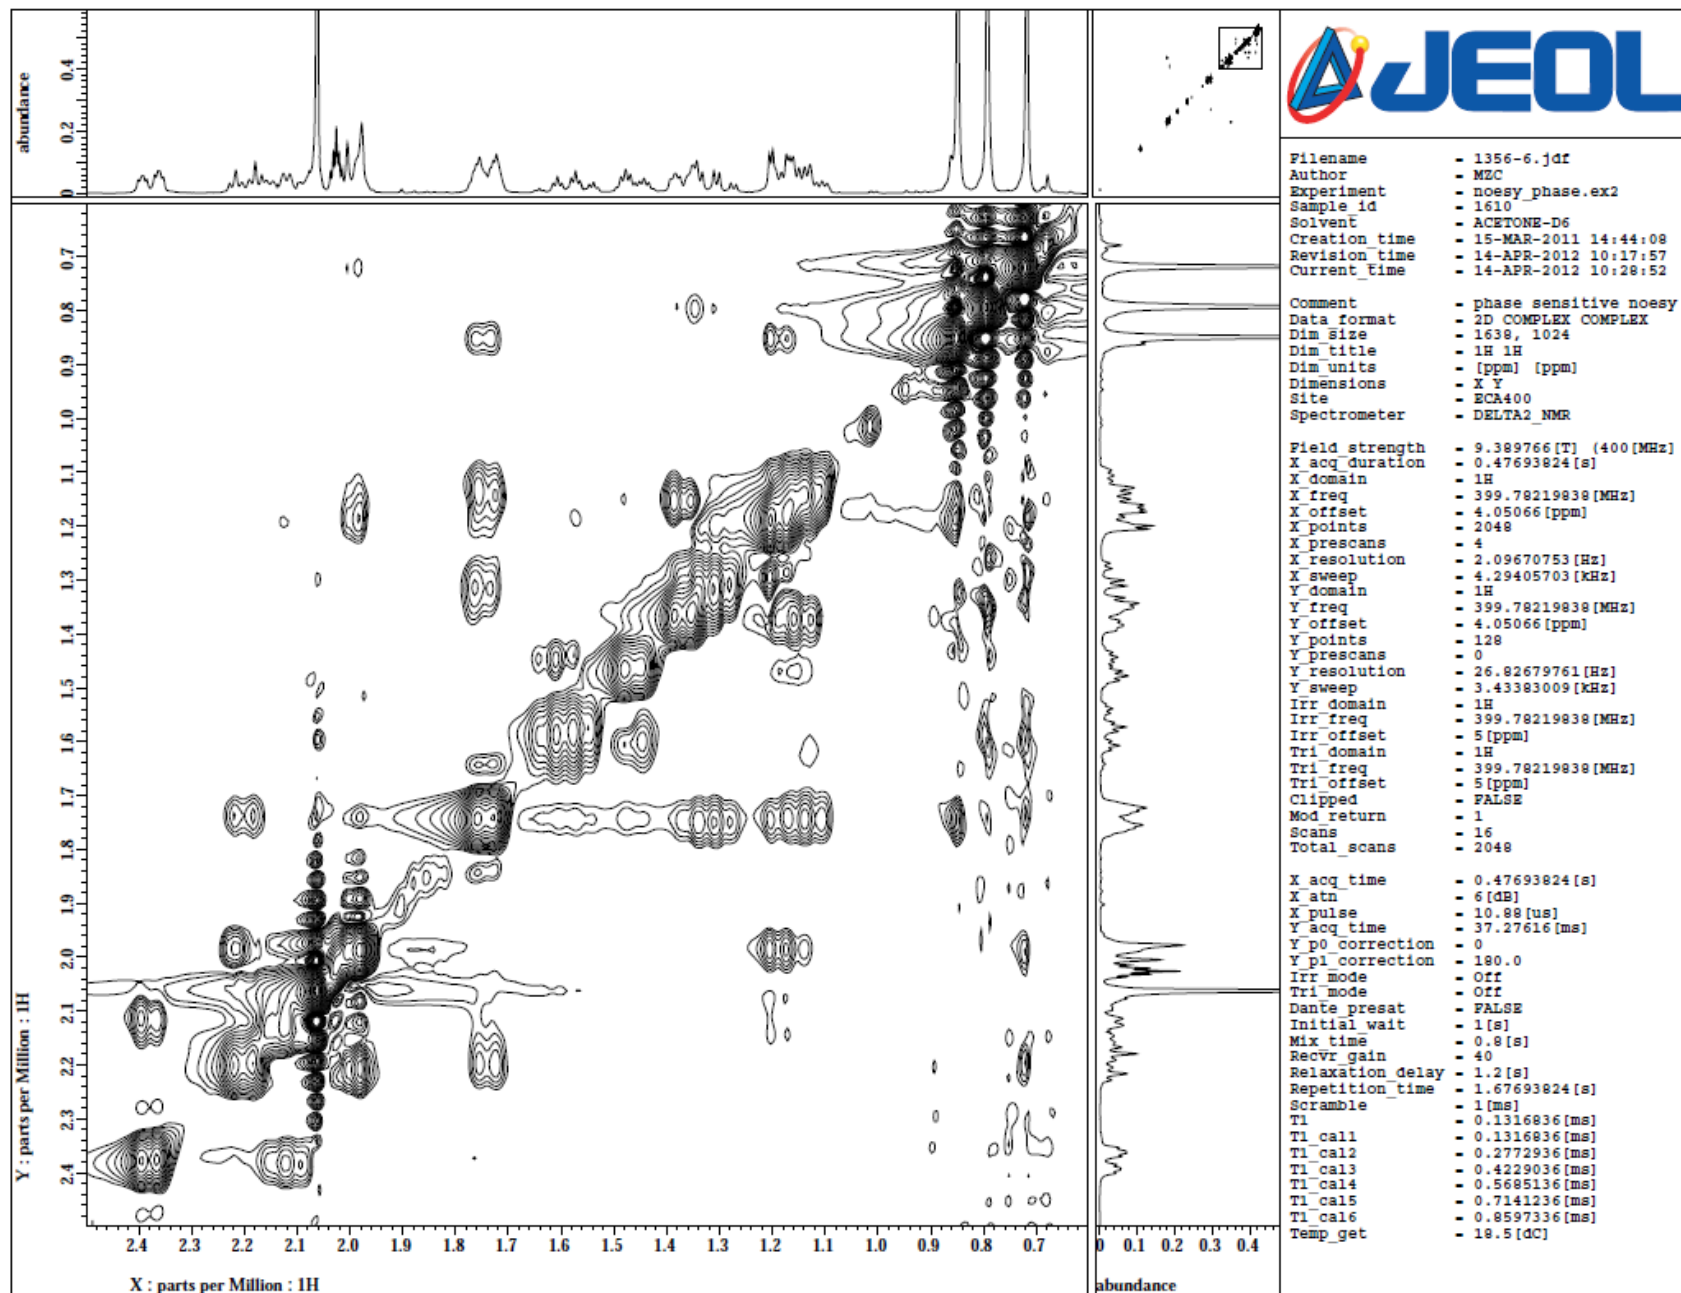

# Expanded NOESY Spectrum of 1 in Acetone- $d_6$

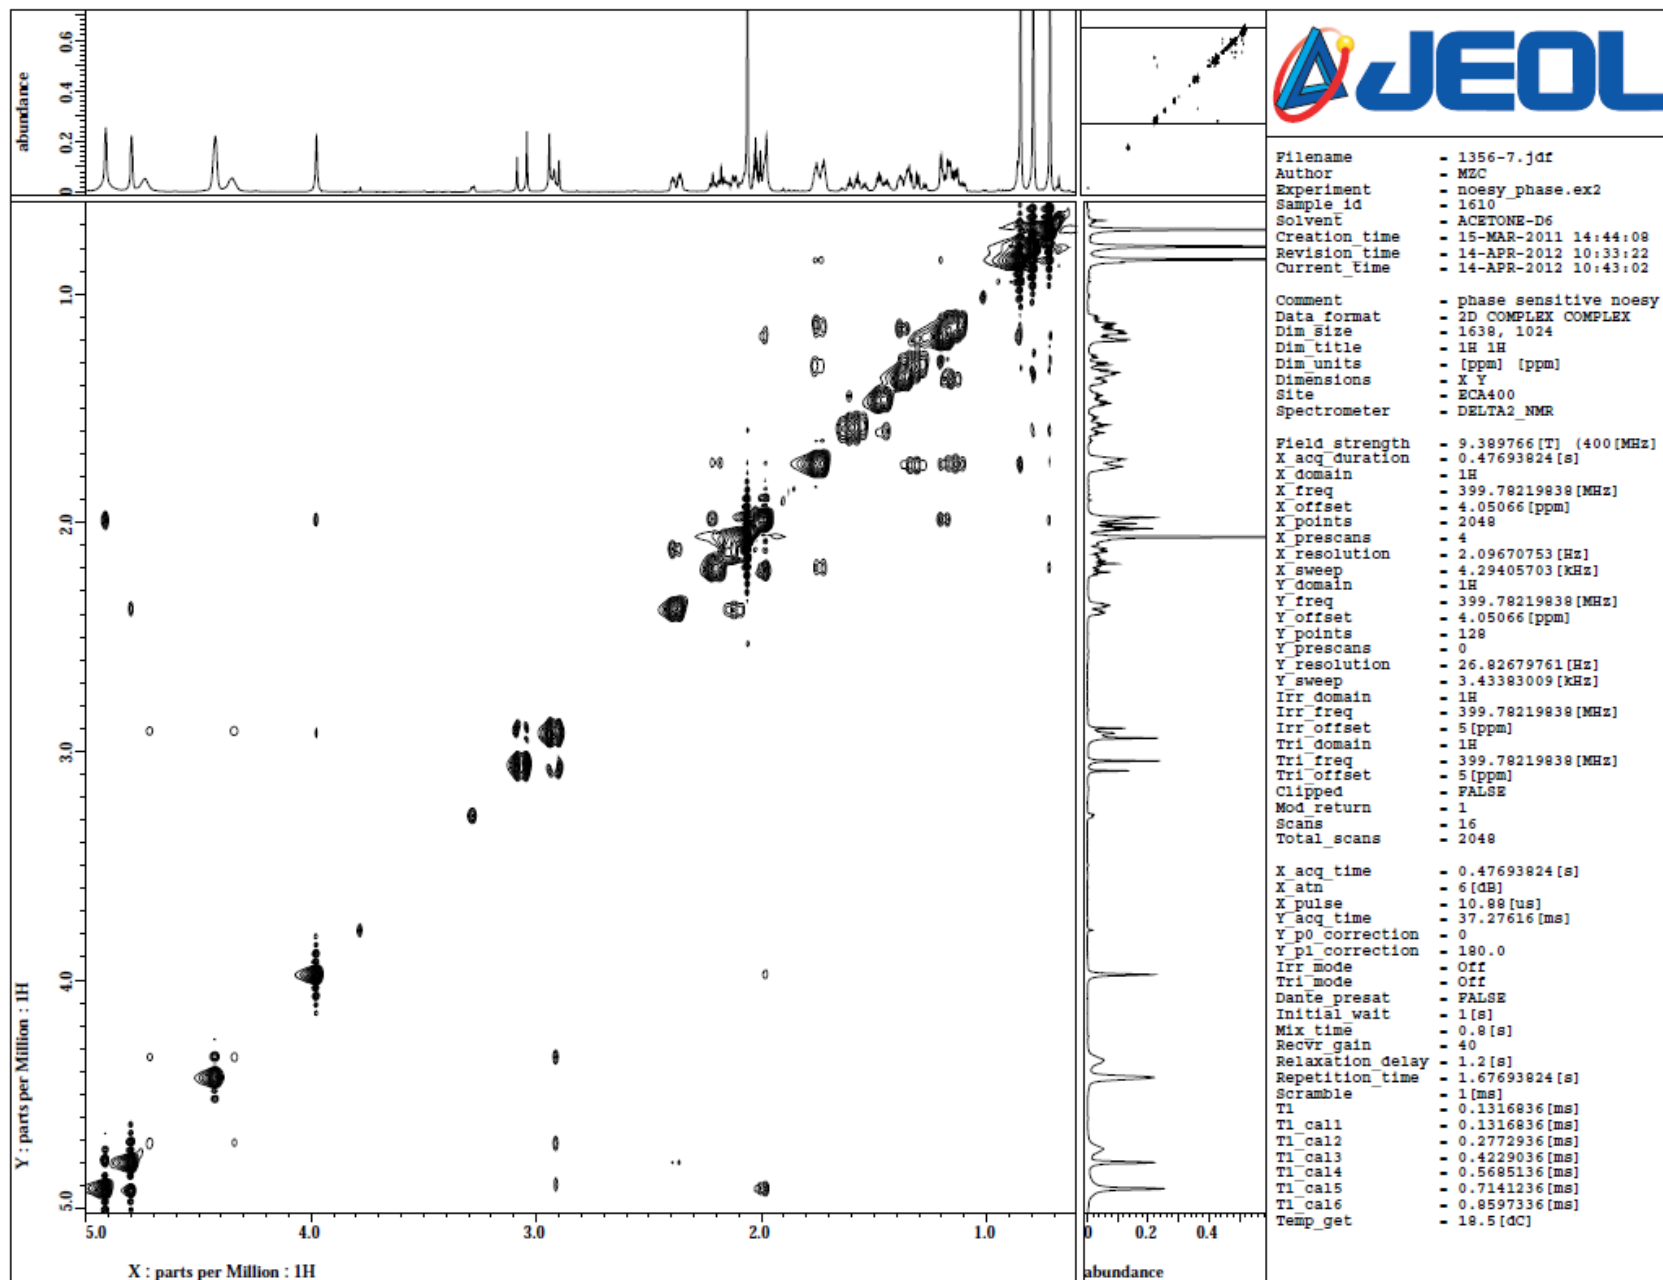



# Expanded NOESY Spectrum of 1 in Acetone- $d_6$

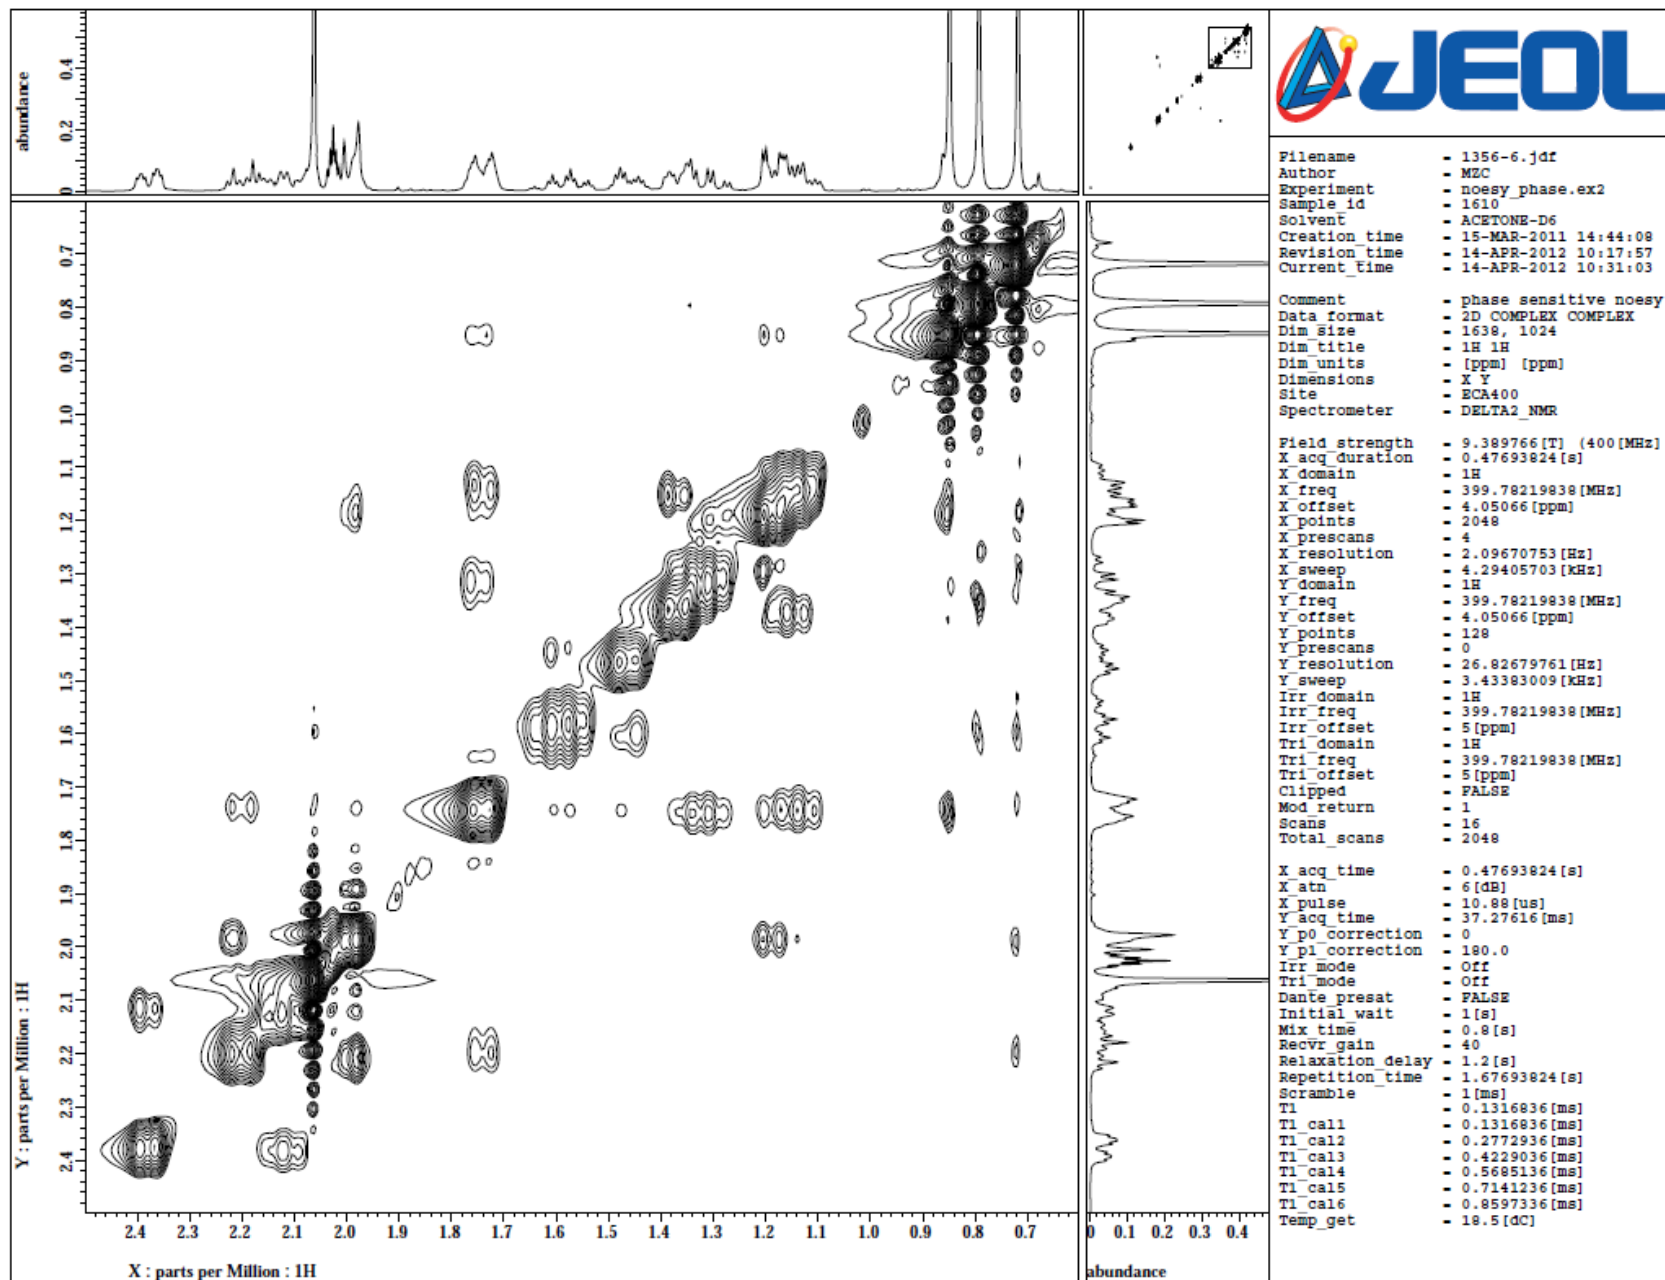

# Expanded NOESY Spectrum of 1 in Acetone- $d_6$

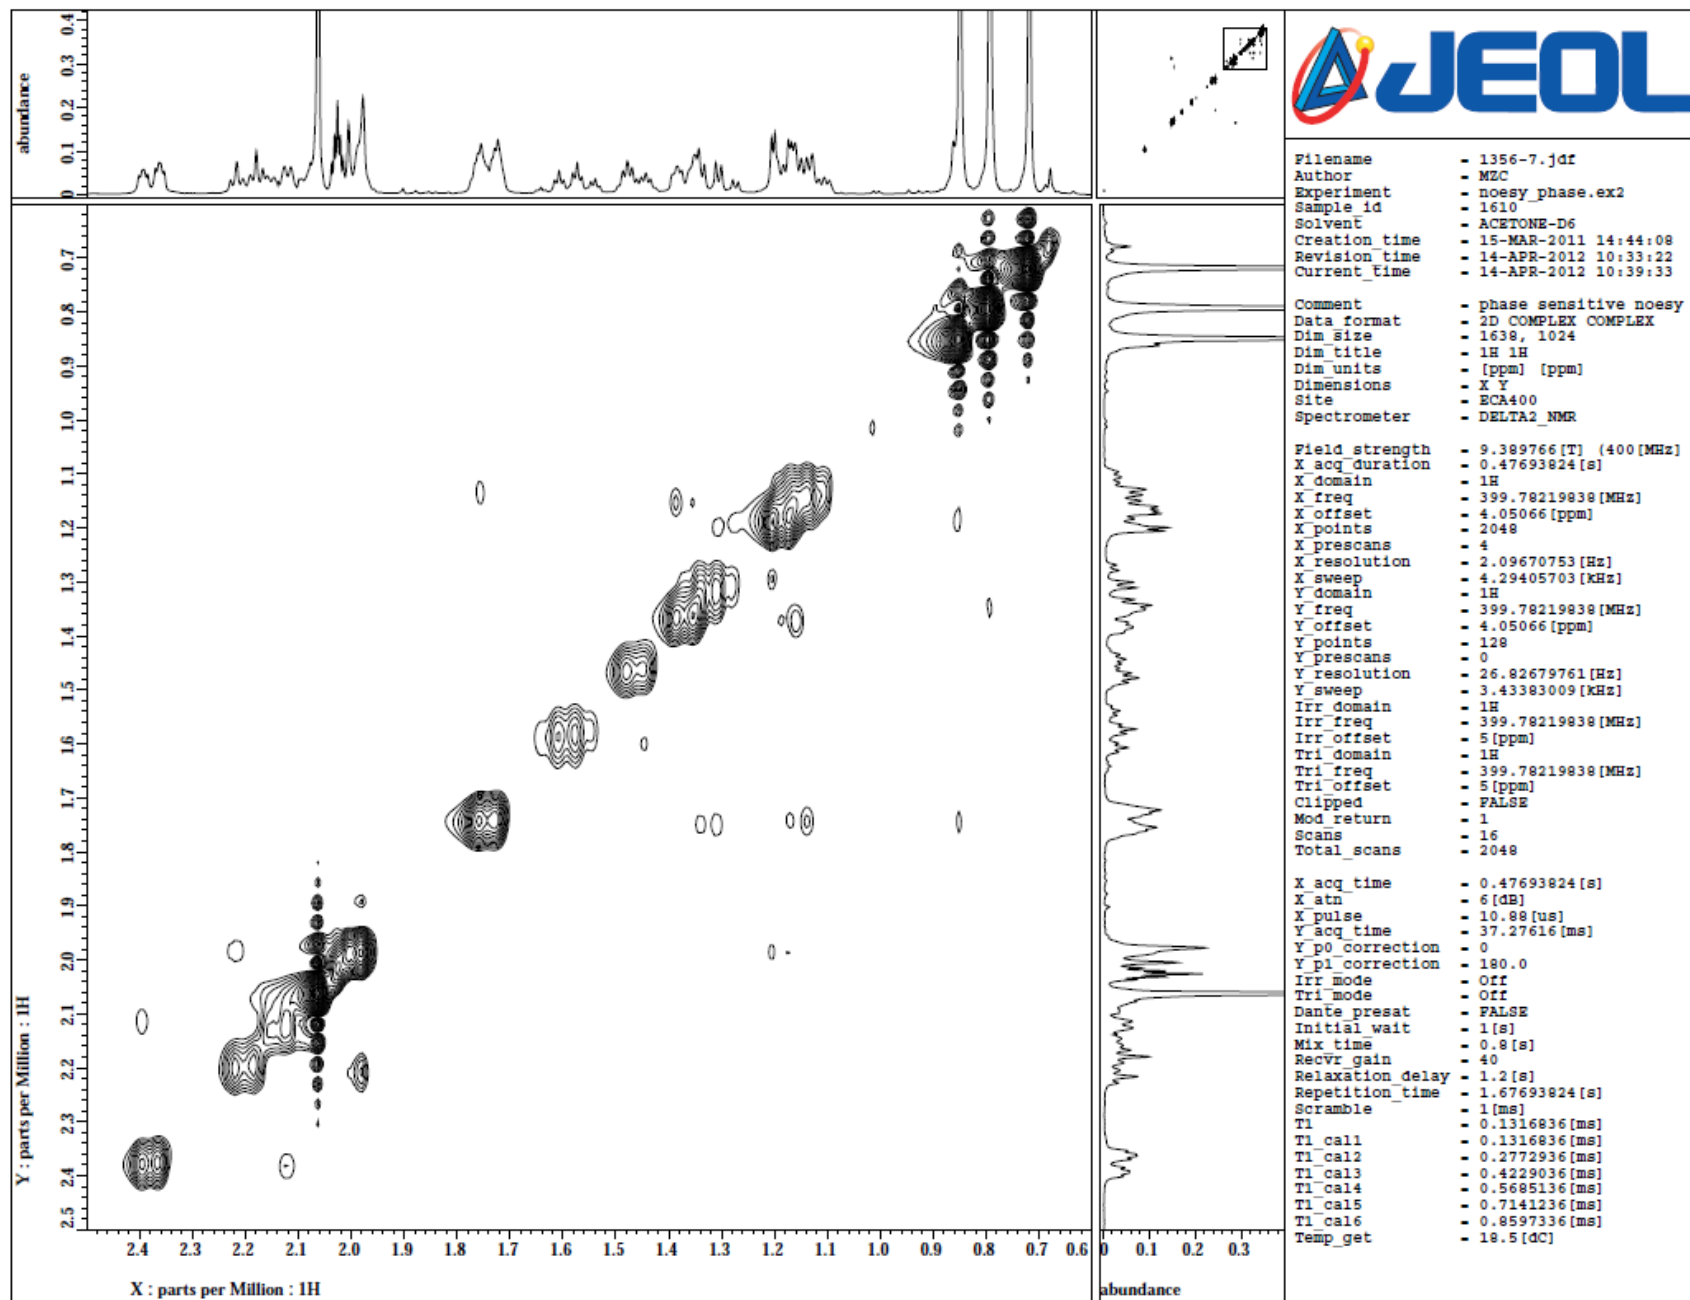

Supplement: s1 [file s1]
