# Supplementary material for: Purpurogemutantin and Purpurogemutantidin, New Drimenyl Cyclohexenone Derivatives Produced by a Mutant Obtained by Diethyl Sulfate Mutagenesis of a Marine-Derived Penicillium purpurogenum G59
Source: MDPI journal article supplement (doi:10.3390/md10061266), 2012-06-04

## Supplementary Materials

### Supplementary Data S5. LC-ESIMS Data for Detecting 1-3 in EtOAc Extracts of G59 and Its Mutant BD-1-6

#### Contents

| Content                                                                             | Page |
|-------------------------------------------------------------------------------------|------|
| 1. Conditions and conclusions of LC-ESIMS analysis to detect compounds <b>1 - 3</b> | 1    |
| 2. LC-ESIMS data for detecting <b>1</b> in parent G59 and its mutant BD-1-6 samples | 2    |
| 3. LC-ESIMS data for detecting <b>2</b> in parent G59 and its mutant BD-1-6 samples | 4    |
| 4. LC-ESIMS data for detecting <b>3</b> in parent G59 and its mutant BD-1-6 samples | 5    |

#### 1. Conditions and conclusions of LC-ESIMS analysis to detect compounds **1-3**

**Conditions:** LC-ESIMS analysis was performed on a LC-MS equipment equipped with Agilent 1100 HPLC system, AB Sciex API 3000 LC-MS/MS system, and AB Sciex Analyst 1.4 software. EtOAc extracts of G59 and BD-1-6 were employed for the LC-ESIMS analysis and crude **1–3** samples were used as control. HPLC was carried out on a Venusil MP C18 column (5  $\mu$ m, 100 Å, 4.6 mm  $\times$  250 mm; Agela Technologies) using MeOH–H<sub>2</sub>O in linear gradient (20% MeOH at initial time 0 min  $\rightarrow$  100% MeOH at 60 min  $\rightarrow$  100% MeOH at 90 min; flow rate, 1 ml/min) as mobile phase. The mass detector was set to scan a range from  $m/z$  150 to 1500 in positive (for **1–3**) or negative (for **1**) mode. The acquired data were processed by Analyst 1.4 software to obtain targeted LC-ESIMS data.

**Conclusions:** The  $[M+Na]^+$  or  $[M-H]^-$  ions of **1**, **2**, and **3** were appeared as peaks with retention times of 52.3, 53.8, and 55.1 min, respectively. Compounds **1–3** in BD-1-6 and G59 were examined by using selective ion monitoring and all of **1–3** were detected only in BD-1-6 but entirely not in G59 samples.

# LC-ESIMS Data for Detecting 1 ( $[M+Na]^+$ ion) in Parent G59 and Its Mutant BD-1-6 Samples

## Positive Selective Ion ( $m/z$ 441.0-442.0) Monitoring Chromatograms

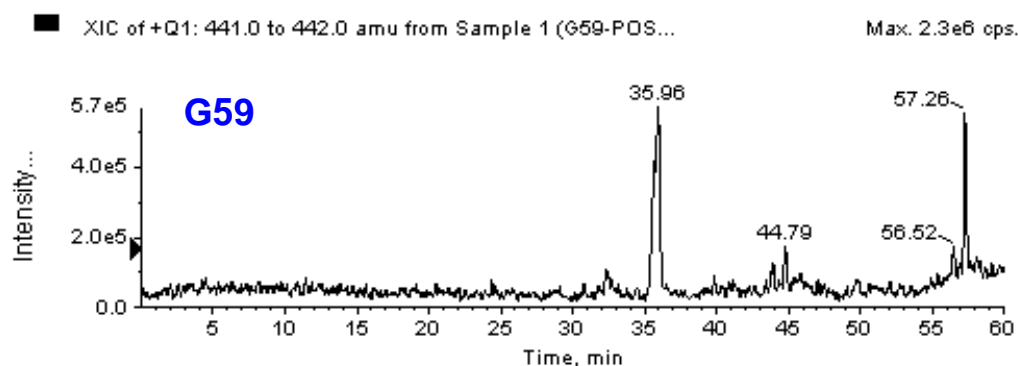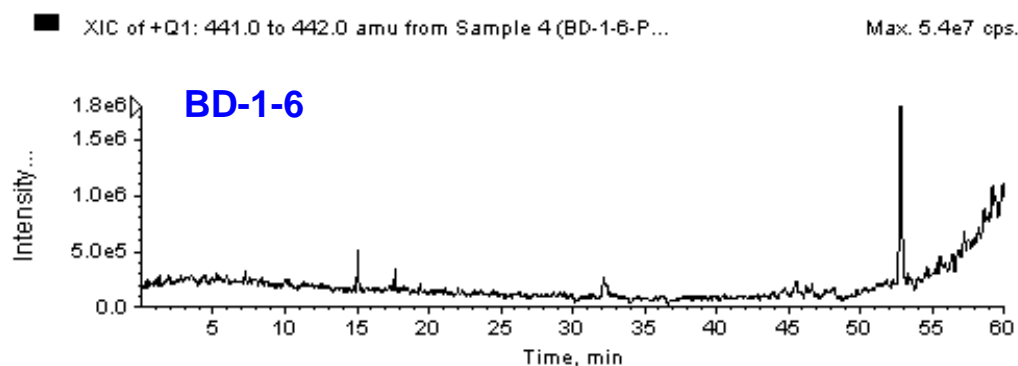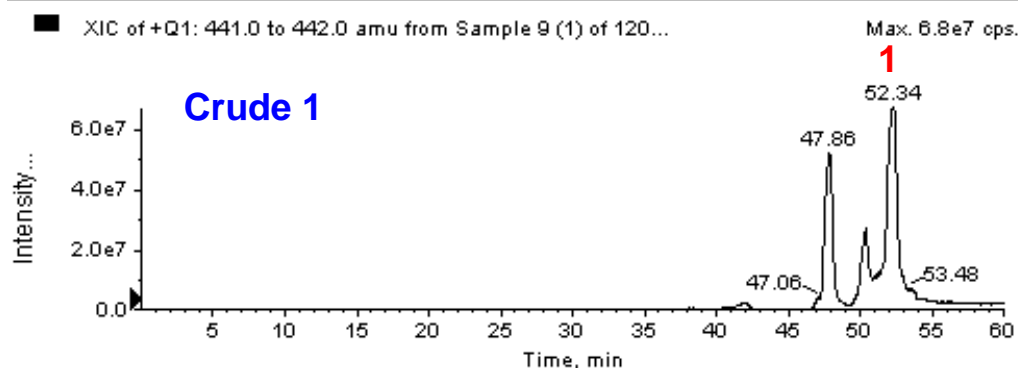

## ESIMS Spectra in the Range of 51.999-53.003 min Retention Times

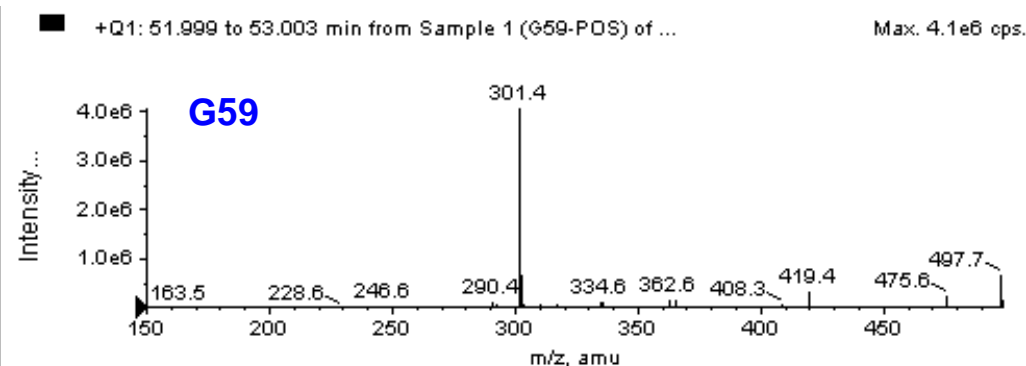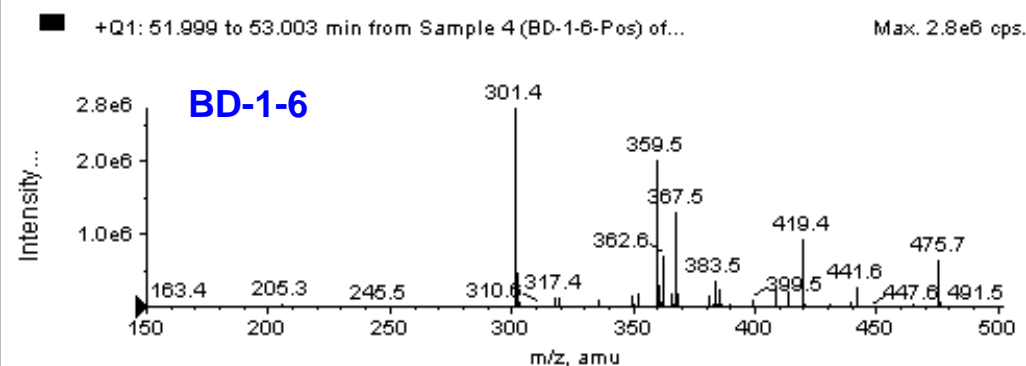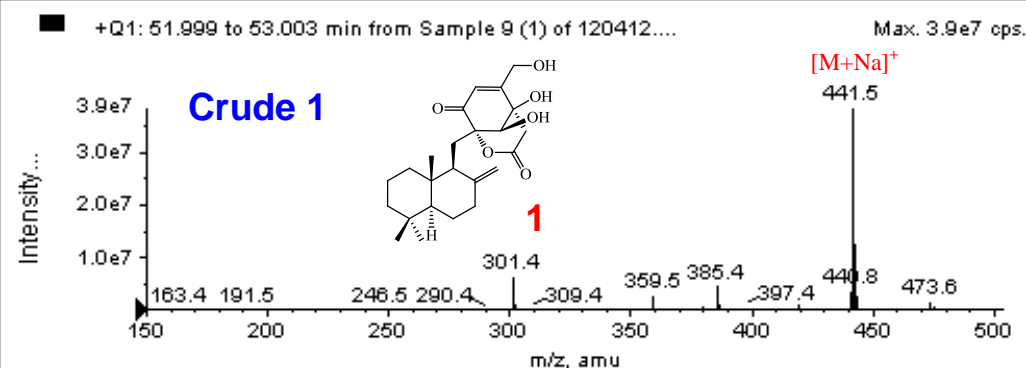

# LC-ESIMS Data for Detecting 1 ( $[M-H]^-$ ion) in Parent G59 and Its Mutant BD-1-6 Samples

## Negative Selective Ion ( $m/z$ 417.0-418.0) Monitoring Chromatograms

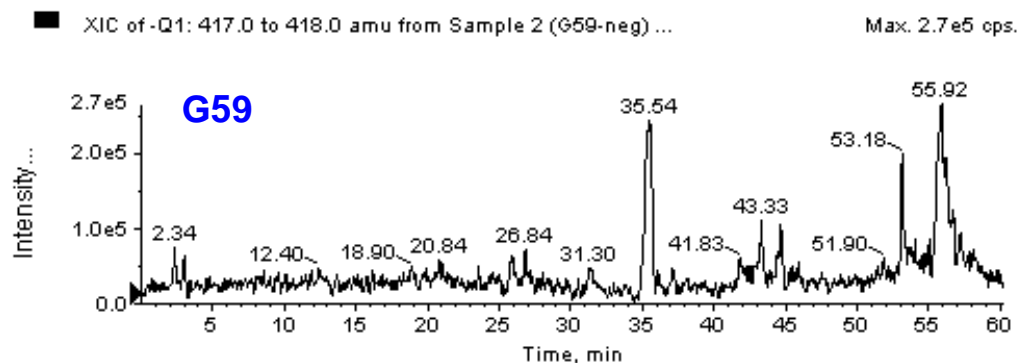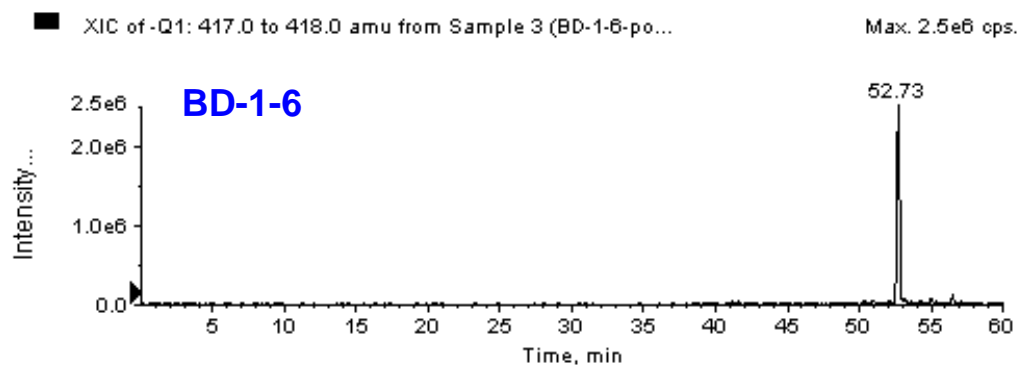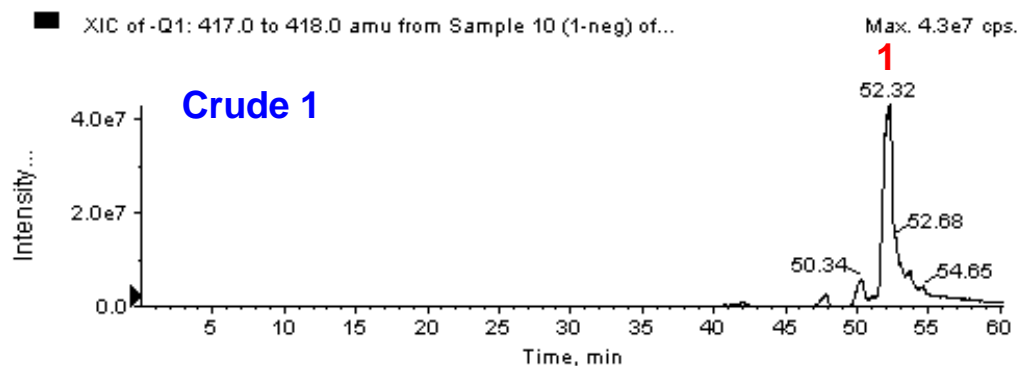

## ESIMS Spectra in the Range of 51.999-53.003 min Retention Times

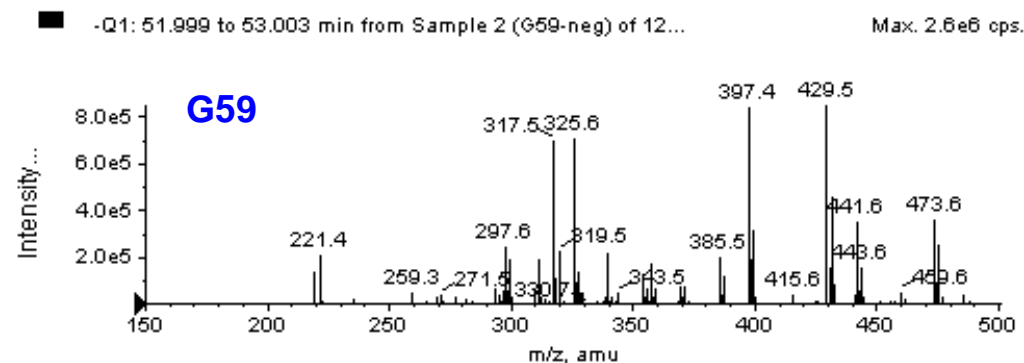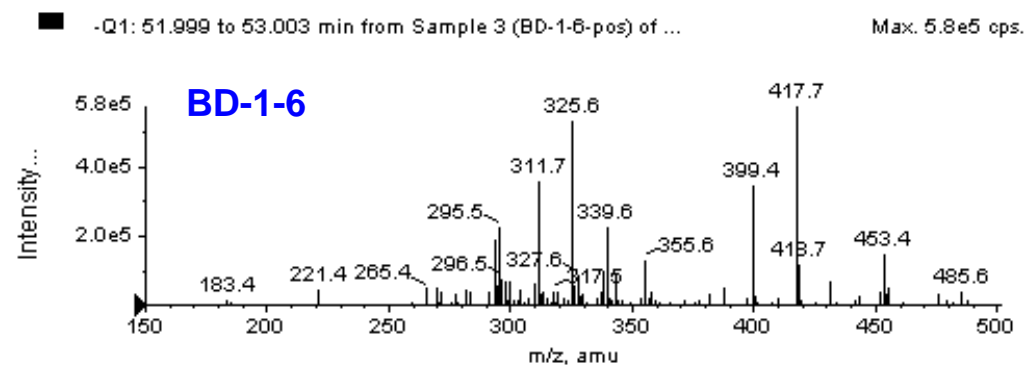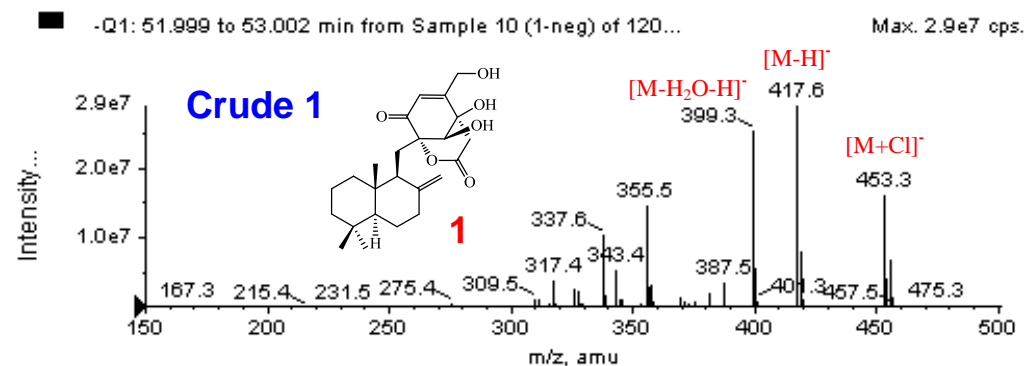

# LC-ESIMS Data for Detecting 2 ( $[M+Na]^+$ ion) in Parent G59 and Its Mutant BD-1-6 Samples

## Positive Selective Ion ( $m/z$ 383.0-384.0) Monitoring Chromatograms

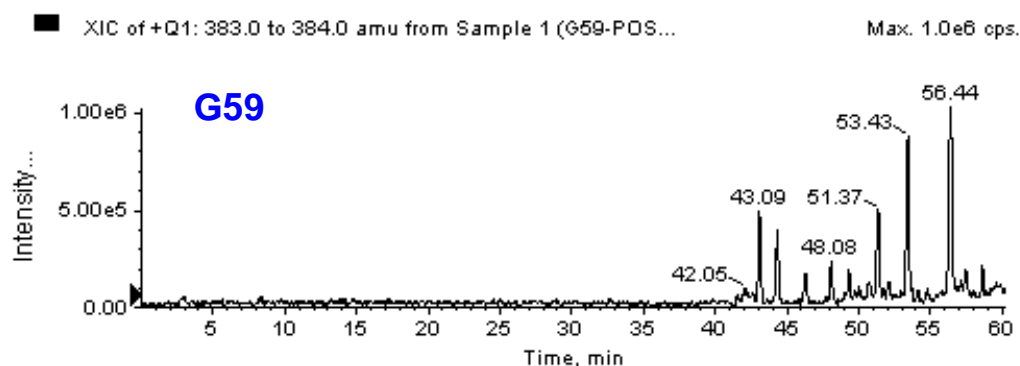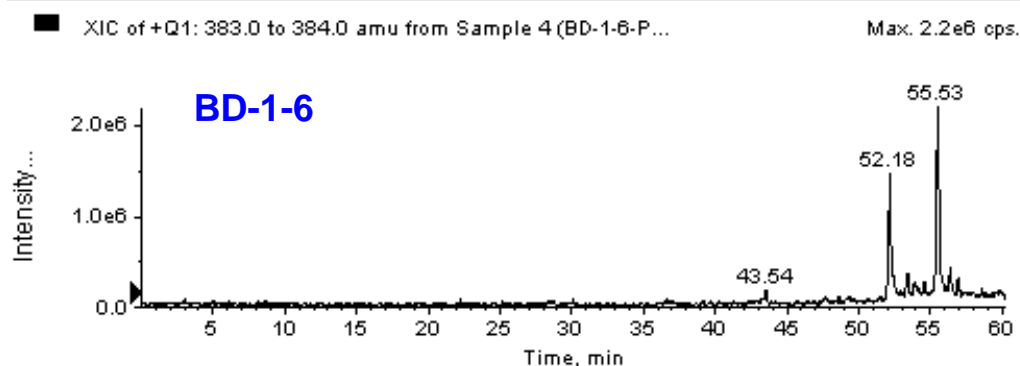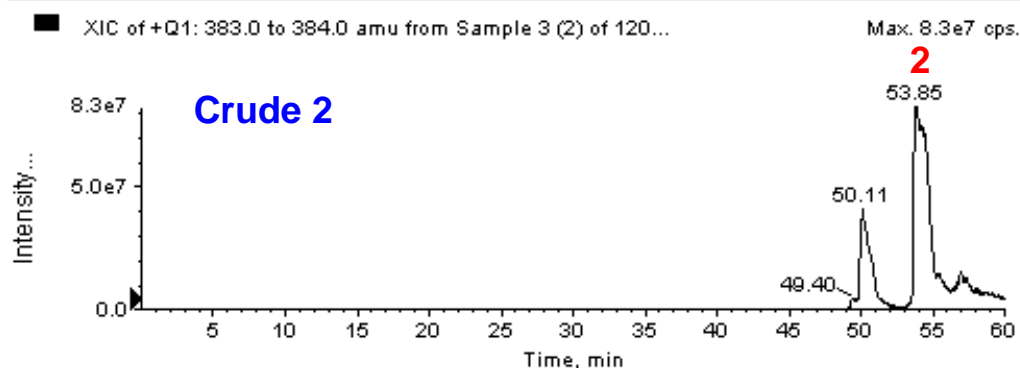

## ESIMS Spectra in the Range of 53.605-54.608 min Retention Times

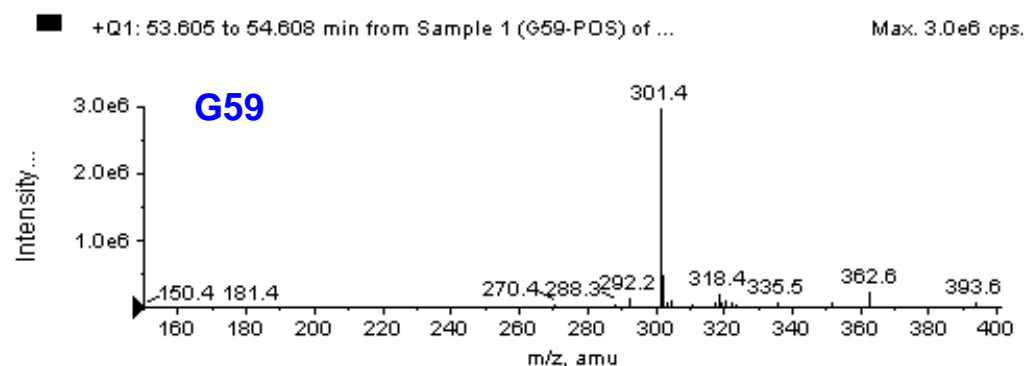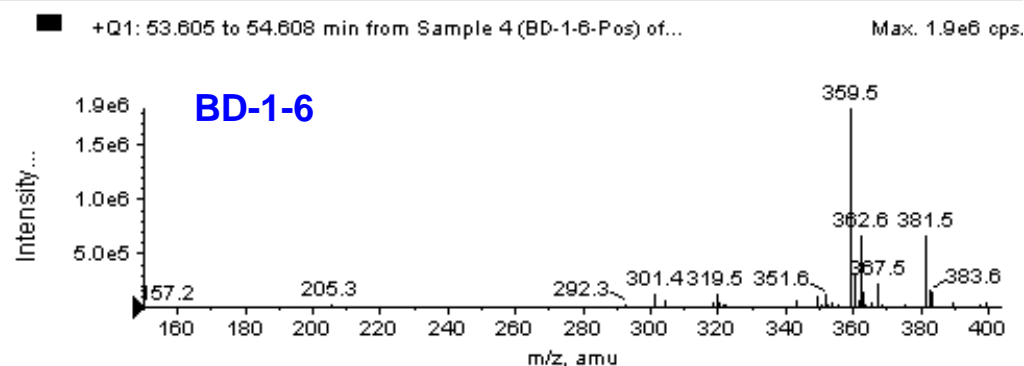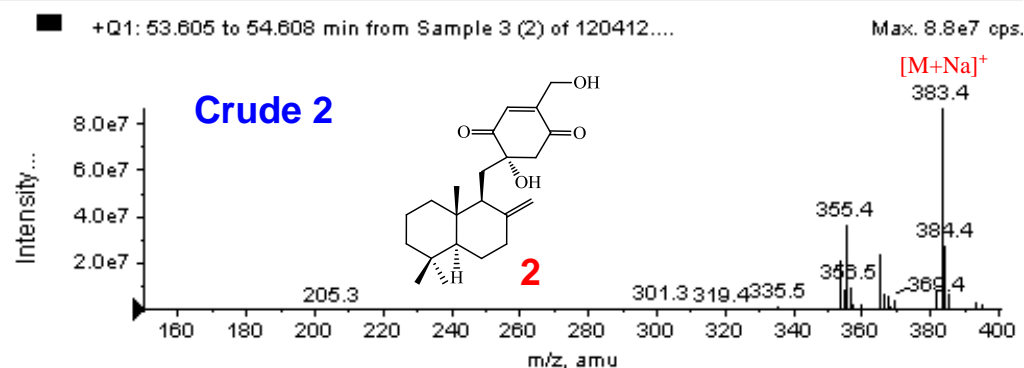

# LC-ESIMS Data for Detecting **3** ( $[M+Na]^+$ ion) in Parent G59 and Its Mutant BD-1-6 Samples

## Positive Selective Ion ( $m/z$ 383.0-384.0) Monitoring Chromatograms

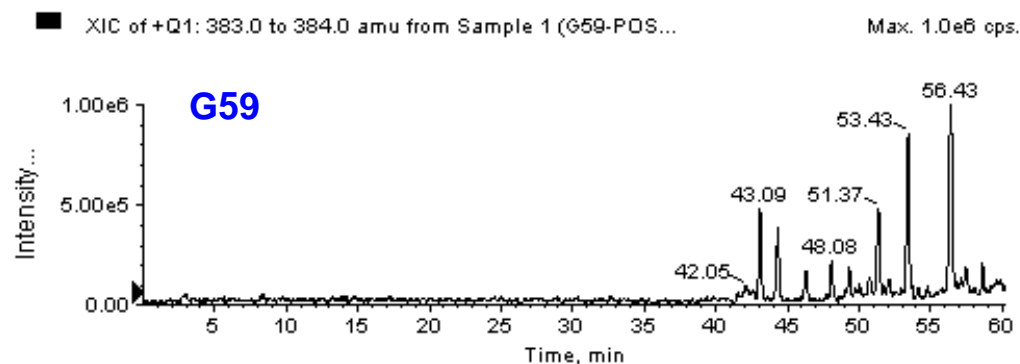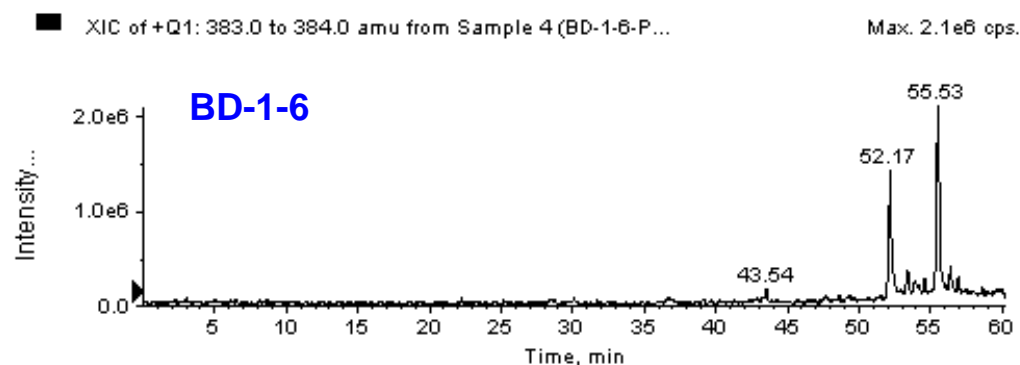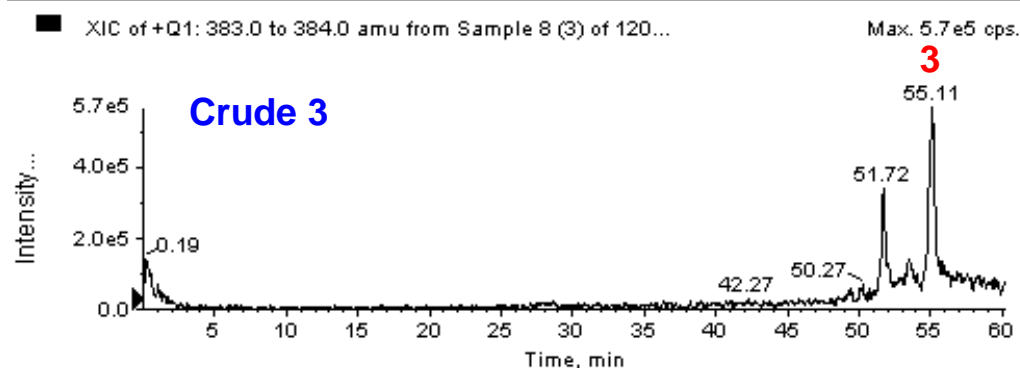

## ESIMS Spectra in the Range of 54.708-55.511 min Retention Times

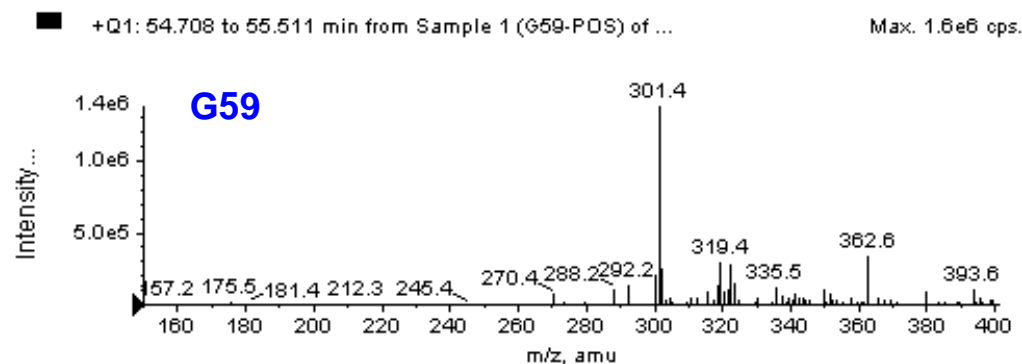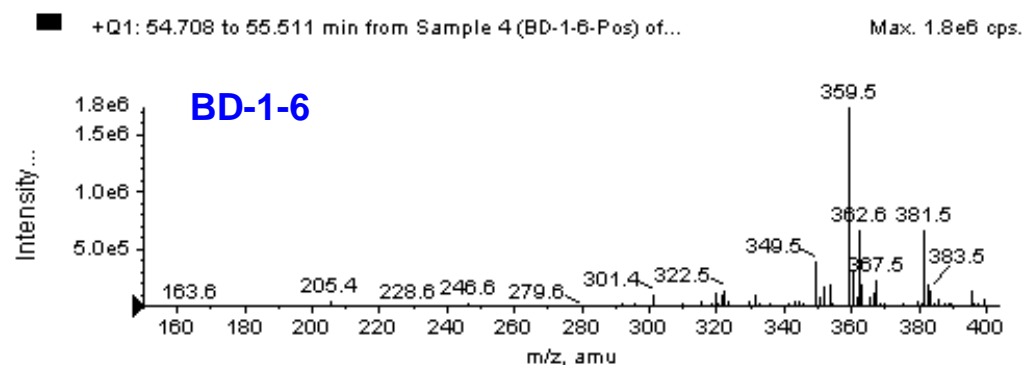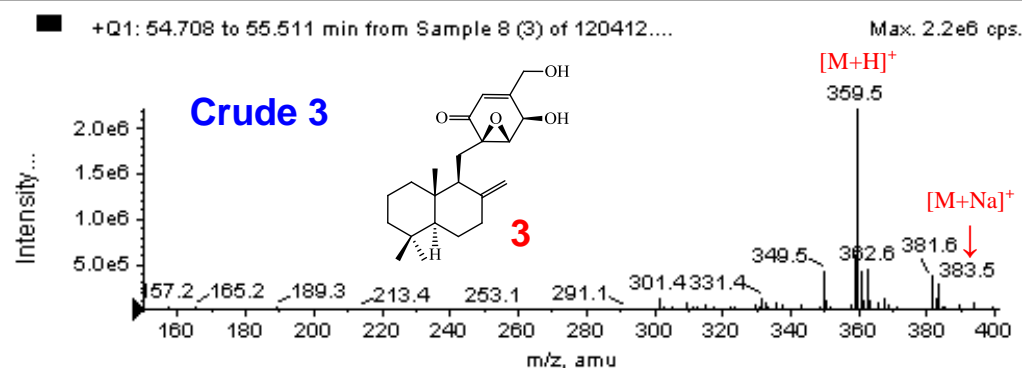

Supplement: s1 [file s1]
