# Supplementary material for: Purpurogemutantin and Purpurogemutantidin, New Drimenyl Cyclohexenone Derivatives Produced by a Mutant Obtained by Diethyl Sulfate Mutagenesis of a Marine-Derived Penicillium purpurogenum G59
Source: MDPI journal article supplement (doi:10.3390/md10061266), 2012-06-04

## Supplementary Materials

### Supplementary Data S3. MS, UV, IR and NMR spectra of **2**

#### Contents

| Content                                                  | Page |
|----------------------------------------------------------|------|
| 1. Positive and negative ESIMS spectra of <b>2</b>       | 2    |
| 2. Positive HRESIMS spectrum of <b>2</b>                 | 3    |
| 3. Negative HRESIMS spectrum of <b>2</b>                 | 4    |
| 4. UV spectrum of <b>2</b>                               | 5    |
| 5. IR spectrum of <b>2</b>                               | 6    |
| 6. $^1\text{H}$ NMR spectrum of <b>2</b>                 | 7    |
| 7. $^{13}\text{C}$ NMR and DEPT spectra of <b>2</b>      | 8    |
| 8. $^1\text{H}$ - $^1\text{H}$ COSY spectrum of <b>2</b> | 10   |
| 9. HMQC spectrum of <b>2</b>                             | 14   |
| 10. HMBC spectrum of <b>2</b>                            | 16   |
| 11. NOESY spectrum of <b>2</b>                           | 19   |

## ESIMS and HRESIMS Spectra of 2

Workstation: API3000

Results Path: N/A

Operator: ab

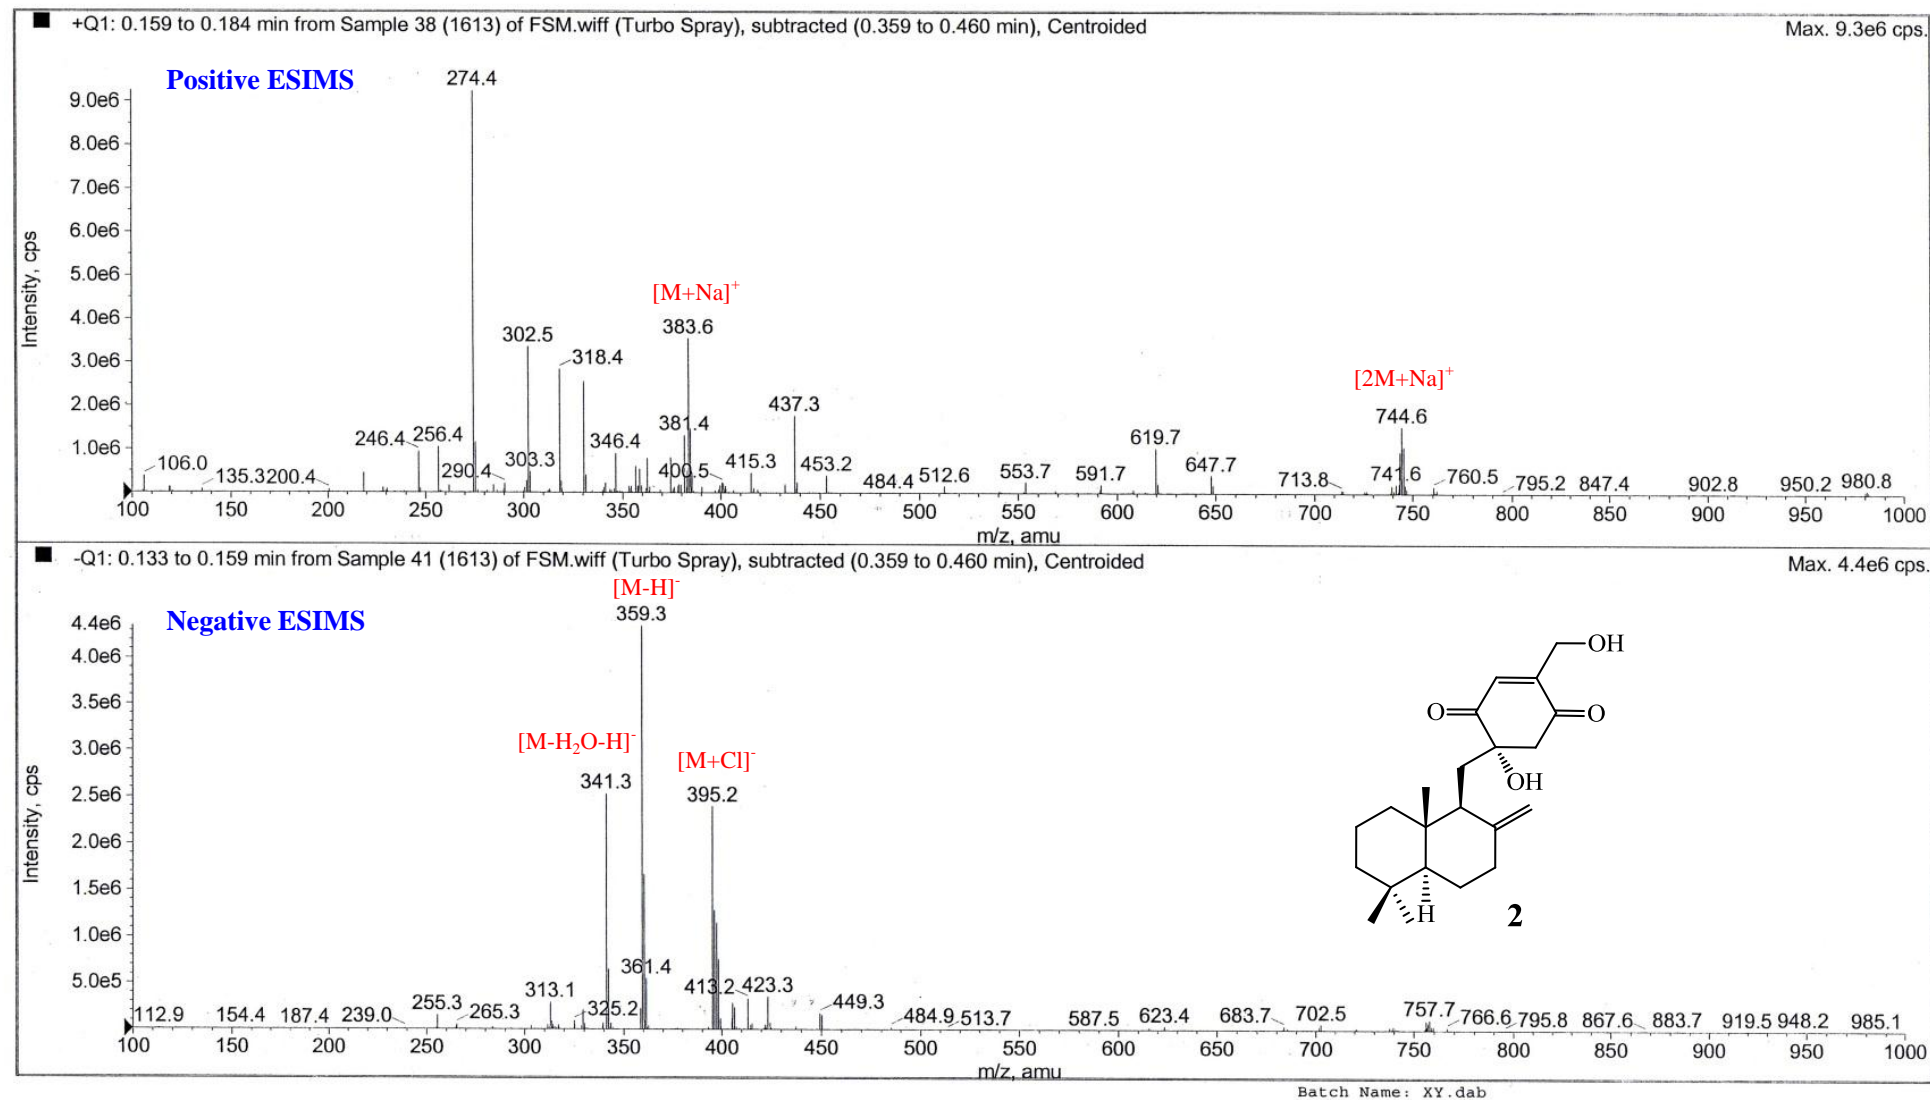

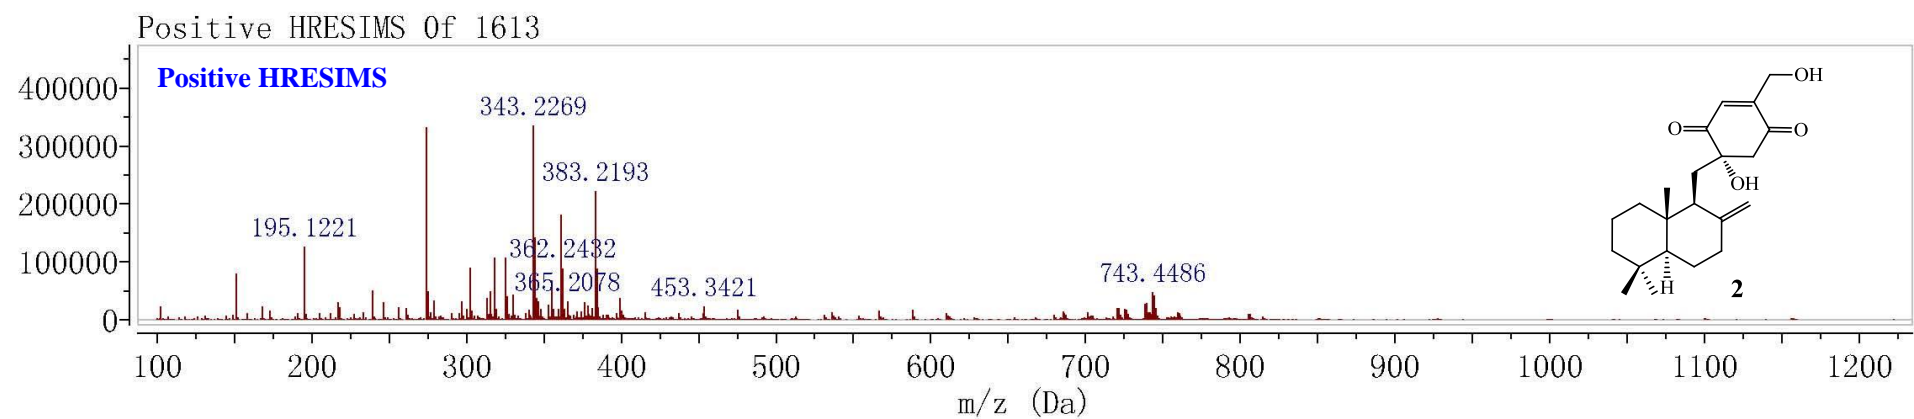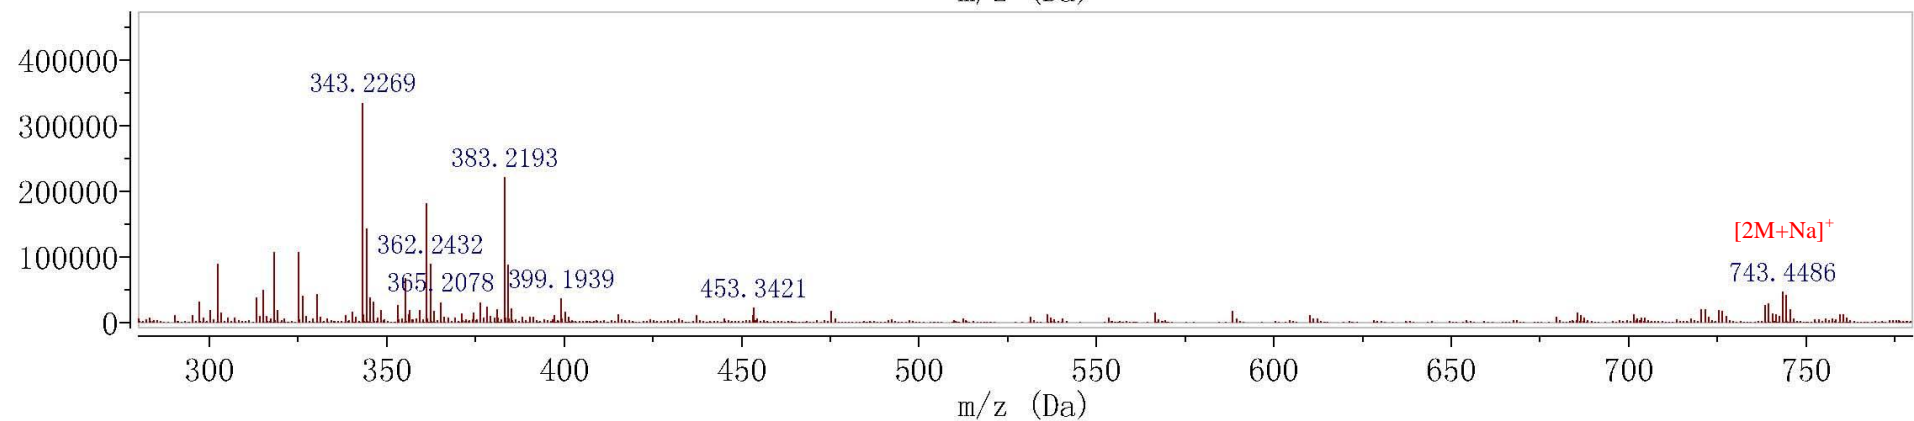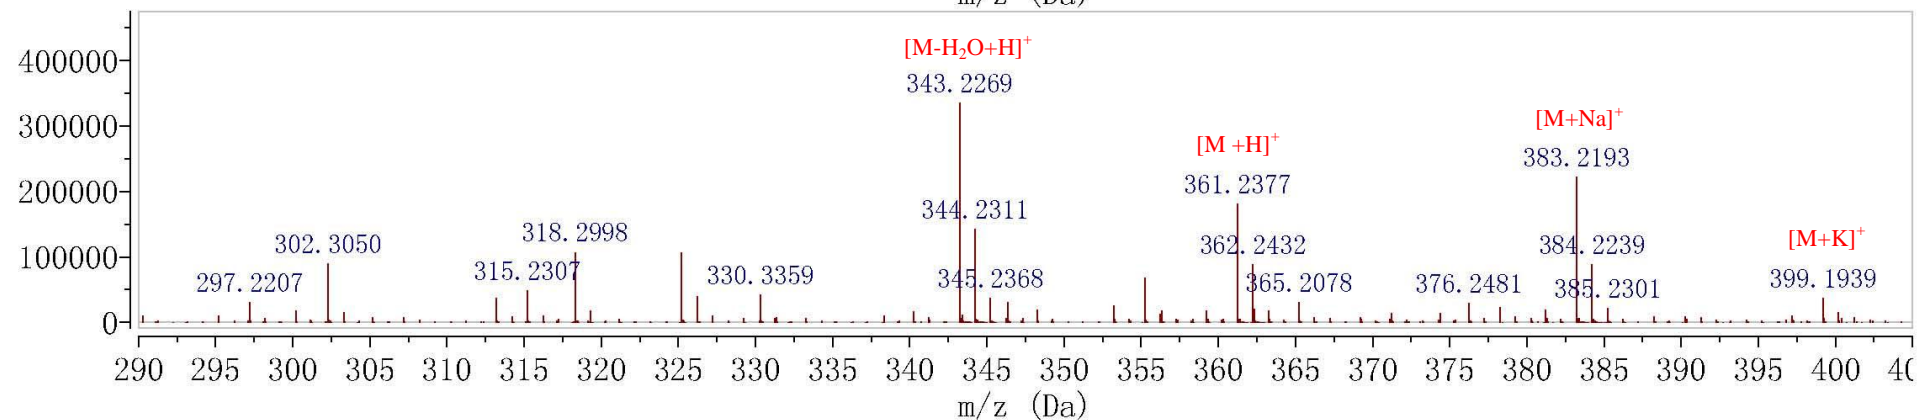

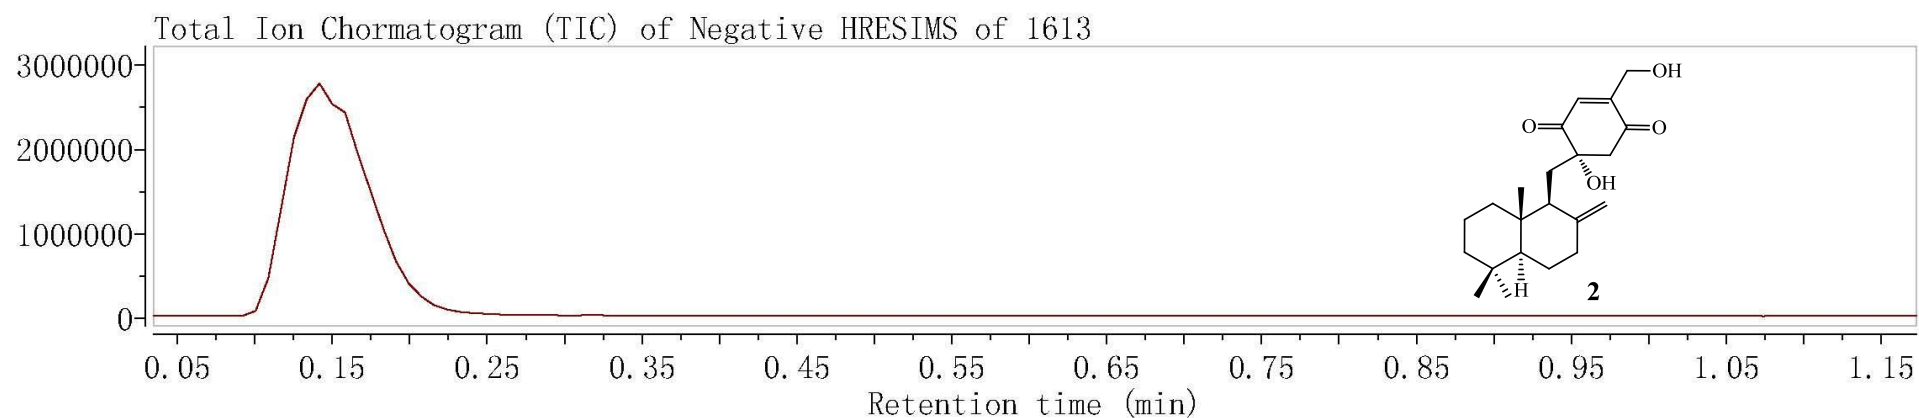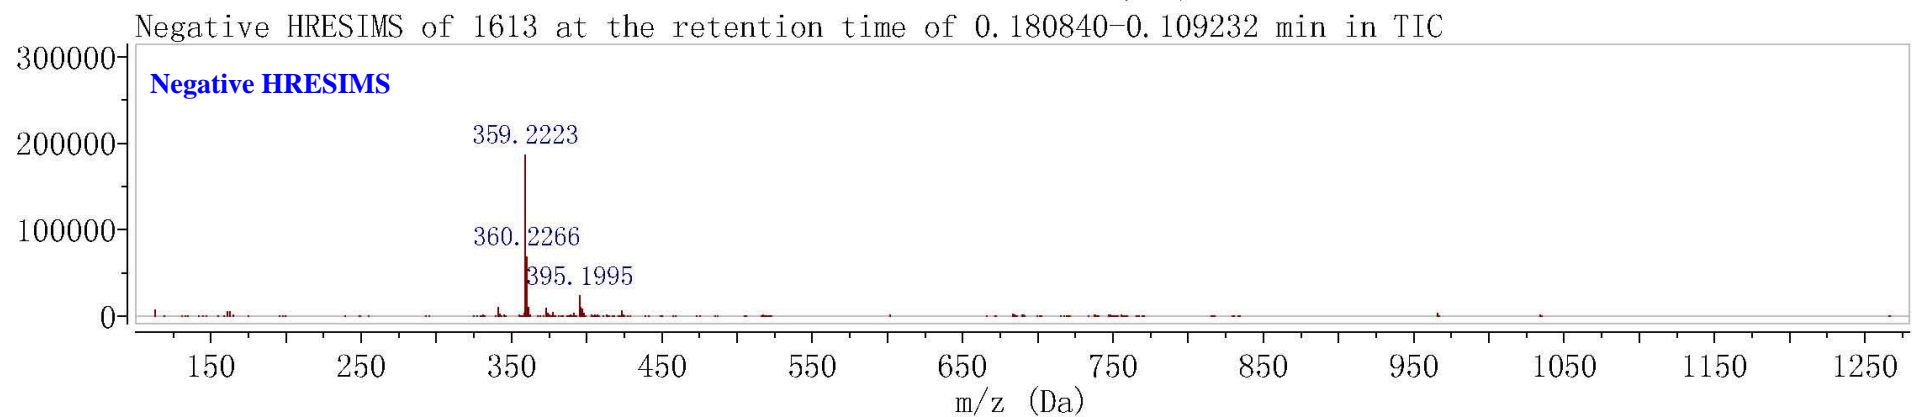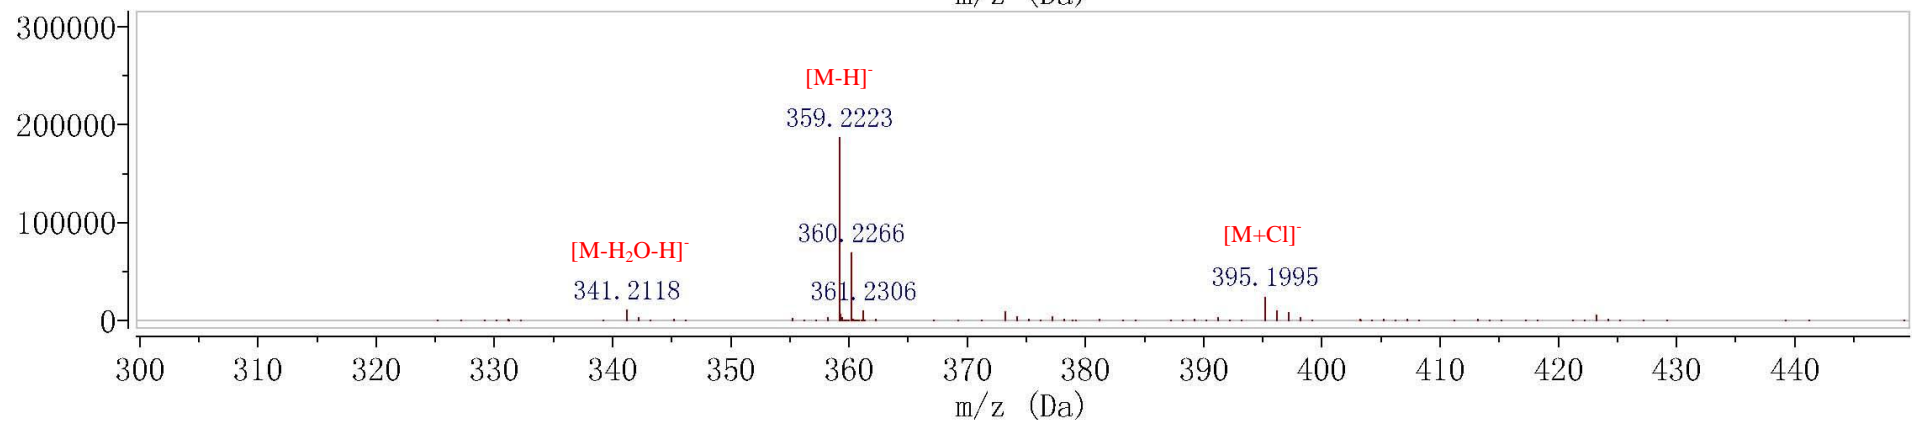

# UV Spectrum of **2** in MeOH

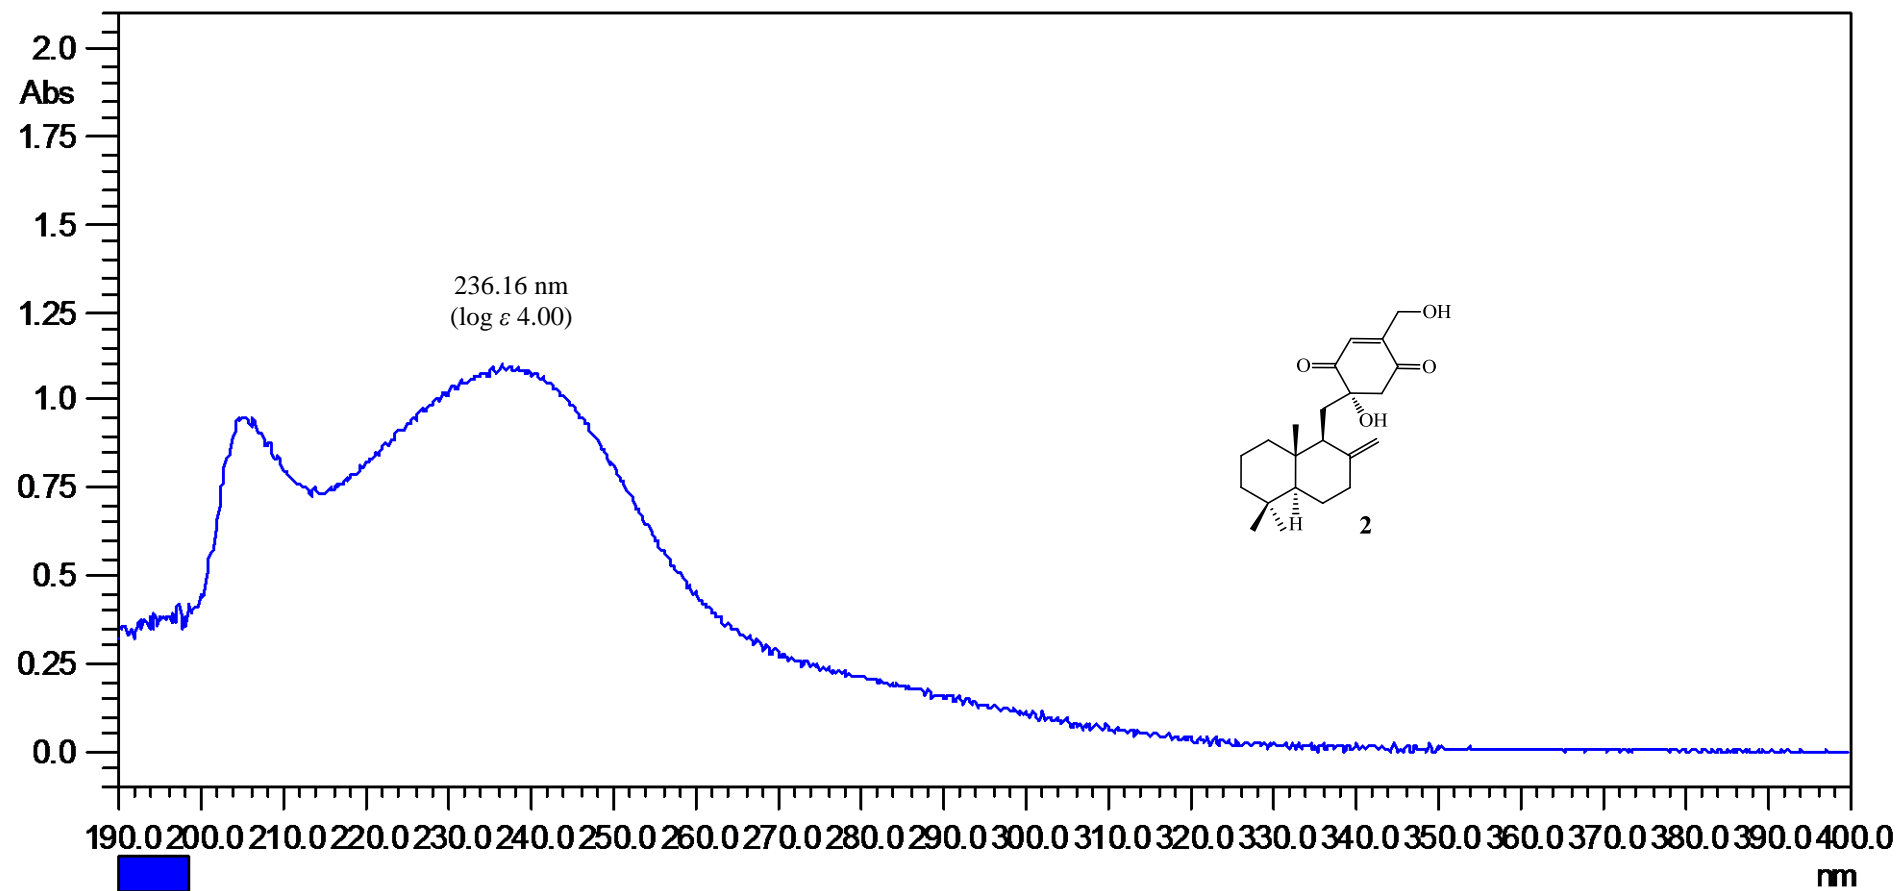

# IR Spectrum of **2**

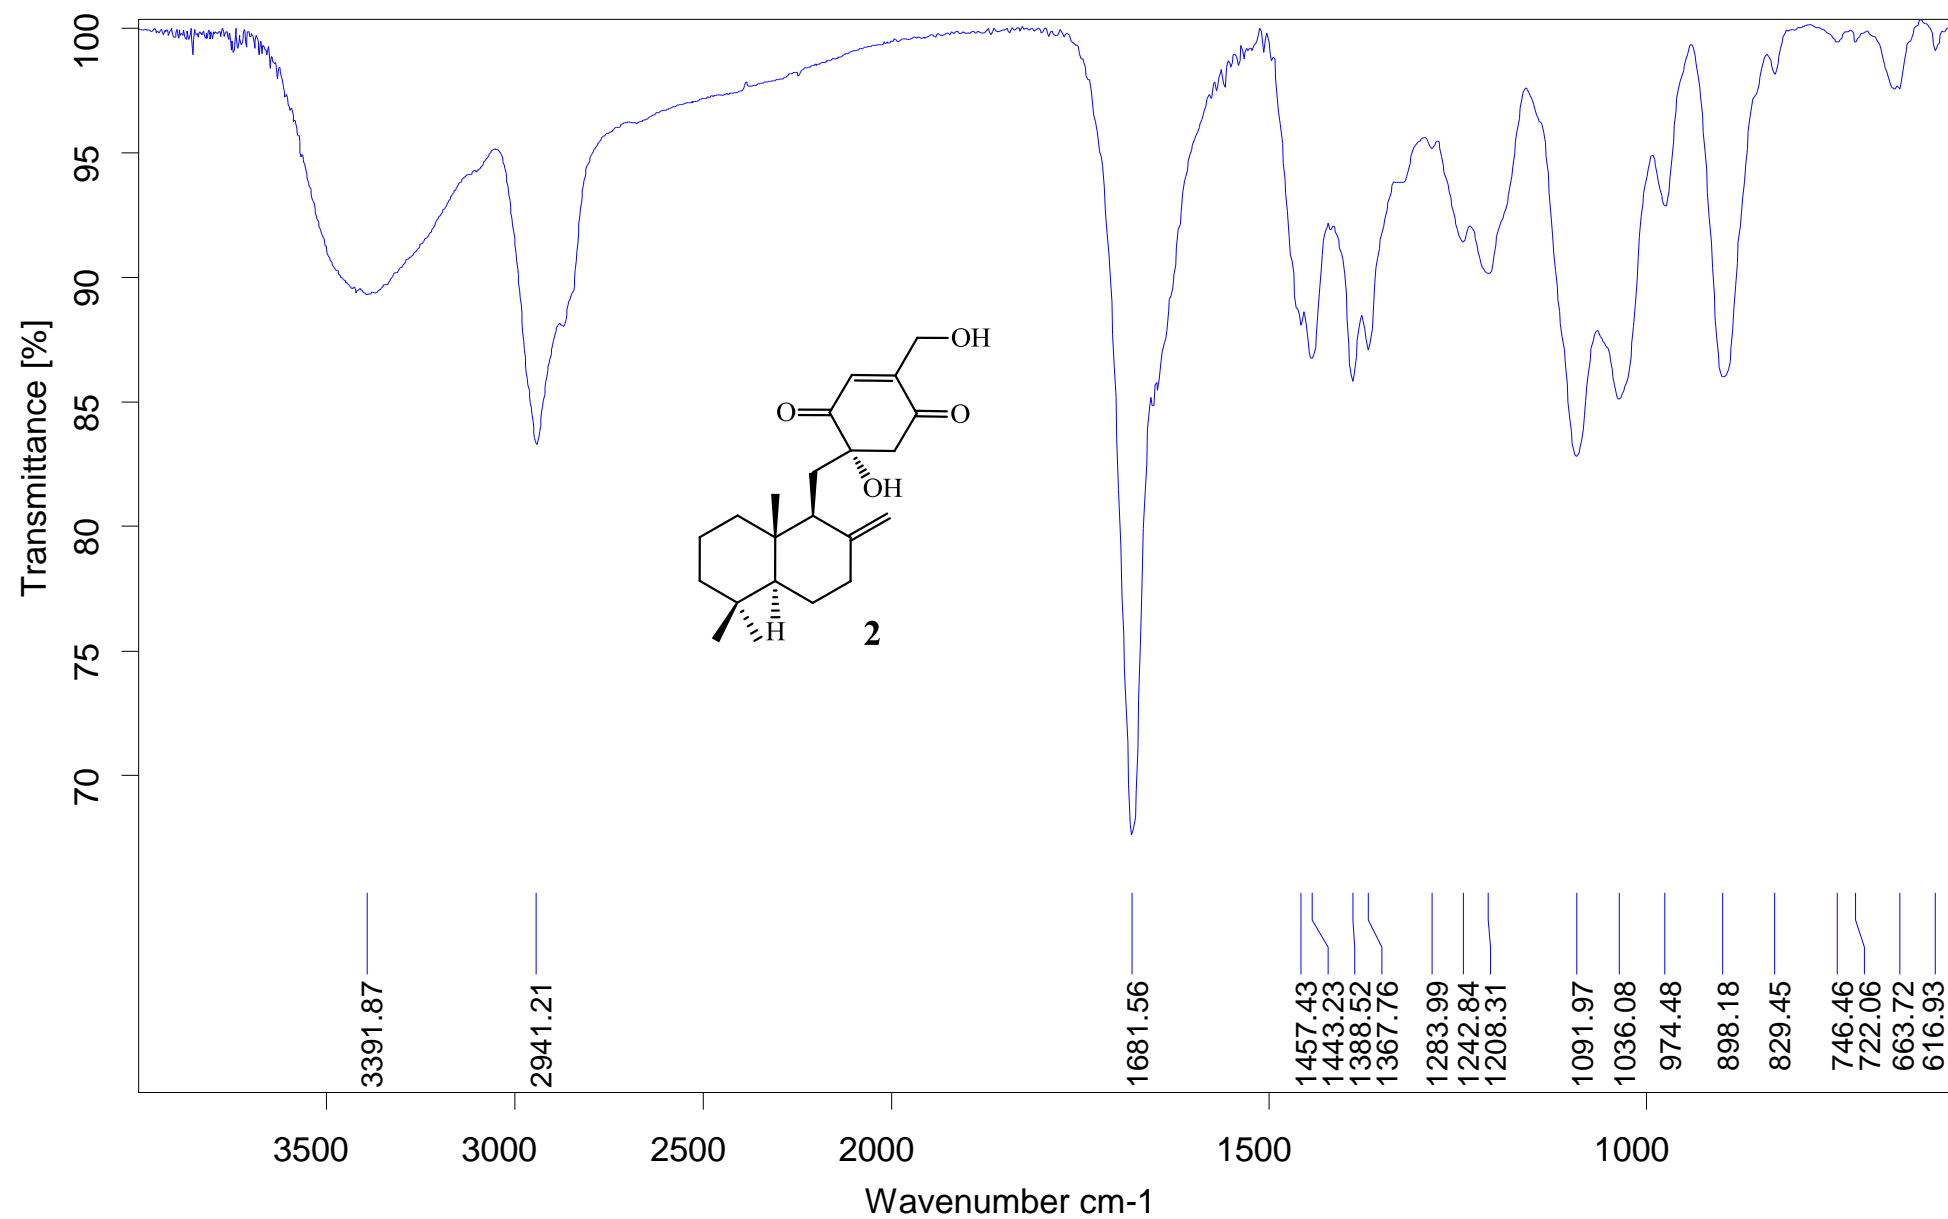

400 MHz  $^1\text{H}$  NMR Spectrum of **2** in  $\text{CDCl}_3$

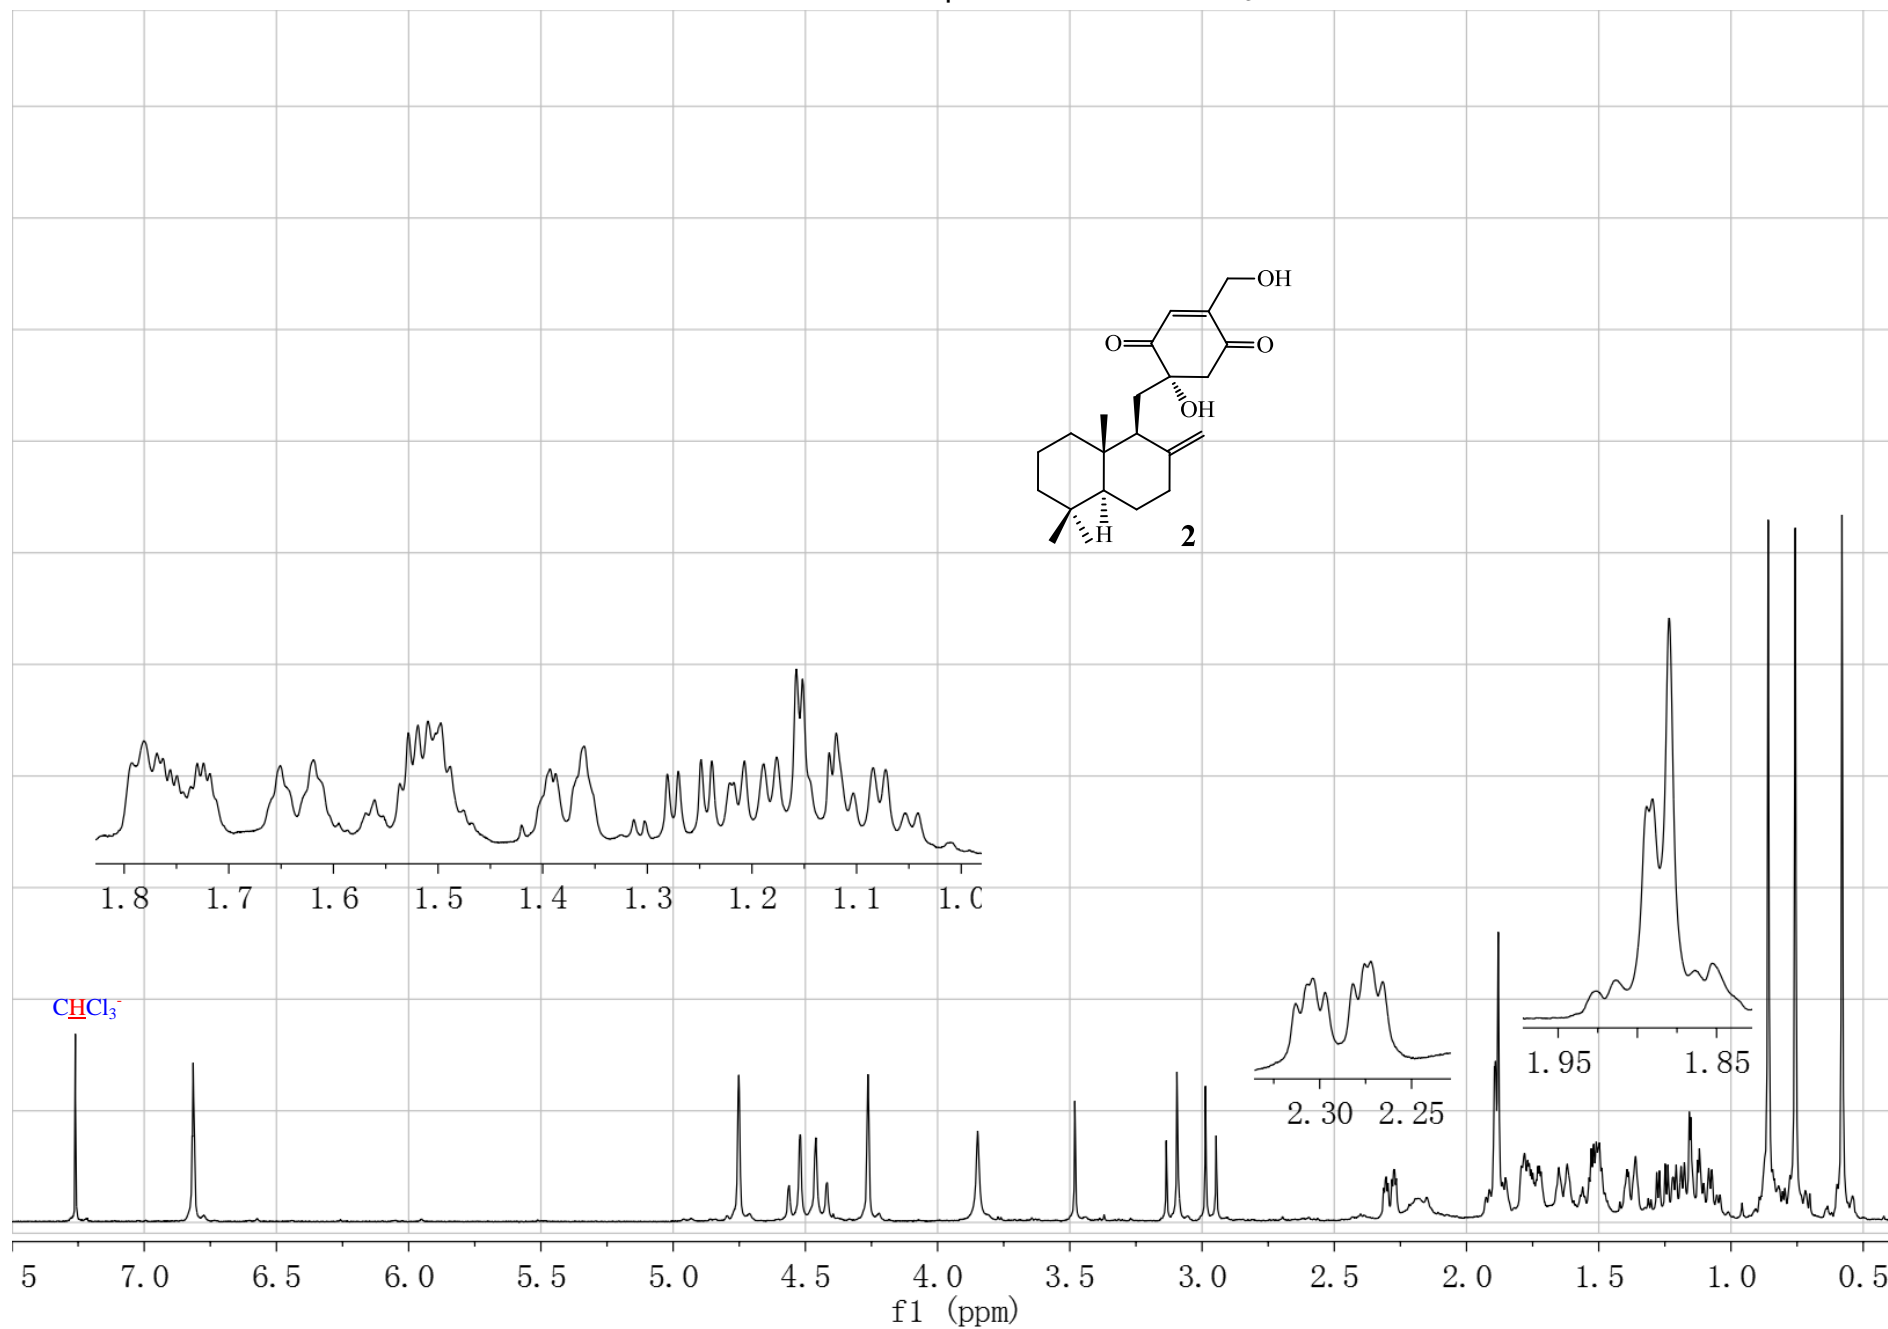

100 MHz  $^{13}\text{C}$  NMR Spectrum of **2** in  $\text{CDCl}_3$

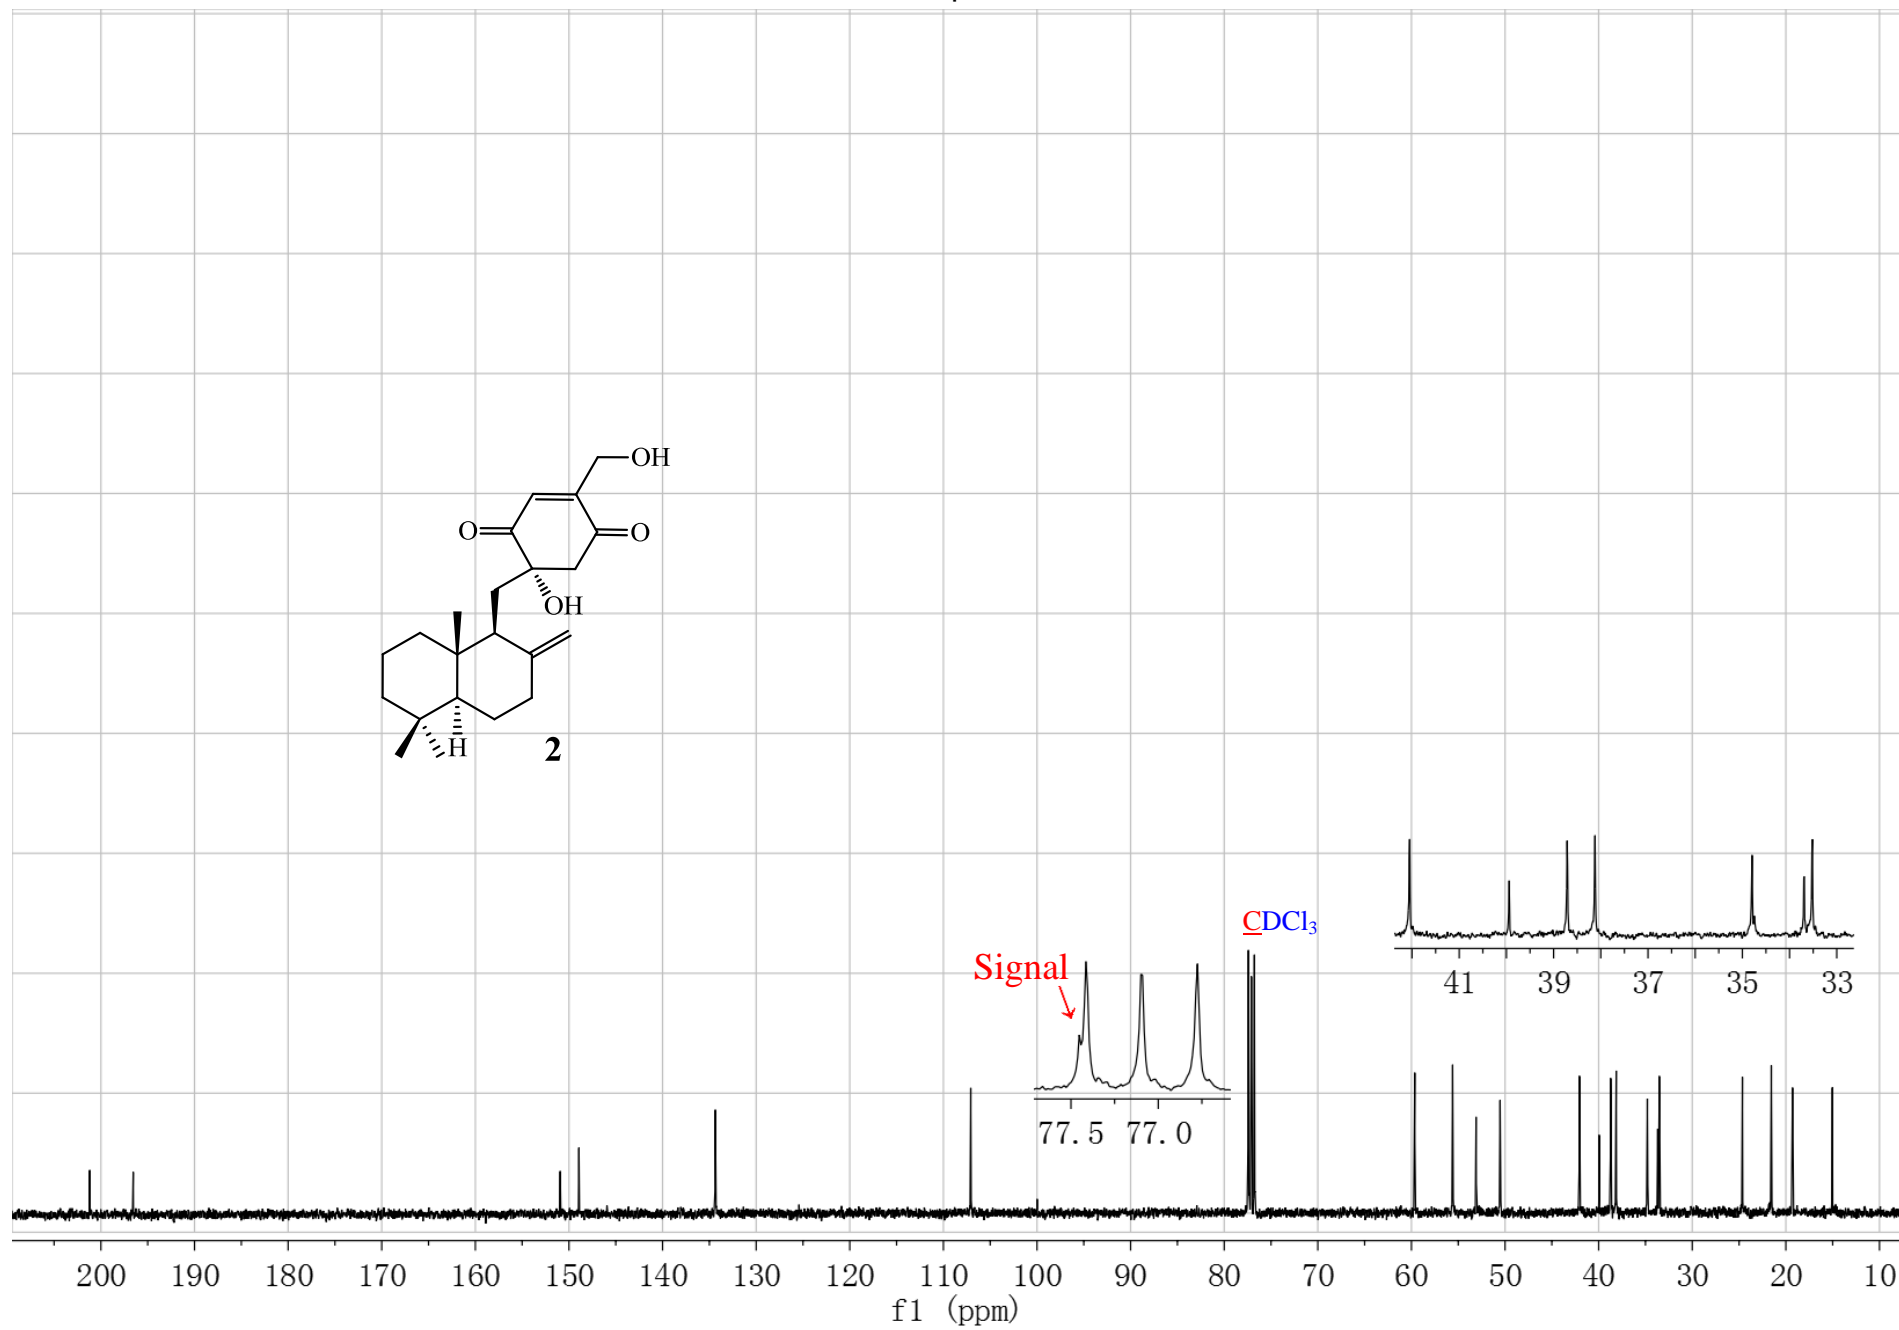



100 MHz  $^{13}\text{C}$  NMR and DEPT Spectra of **2** in  $\text{CDCl}_3$

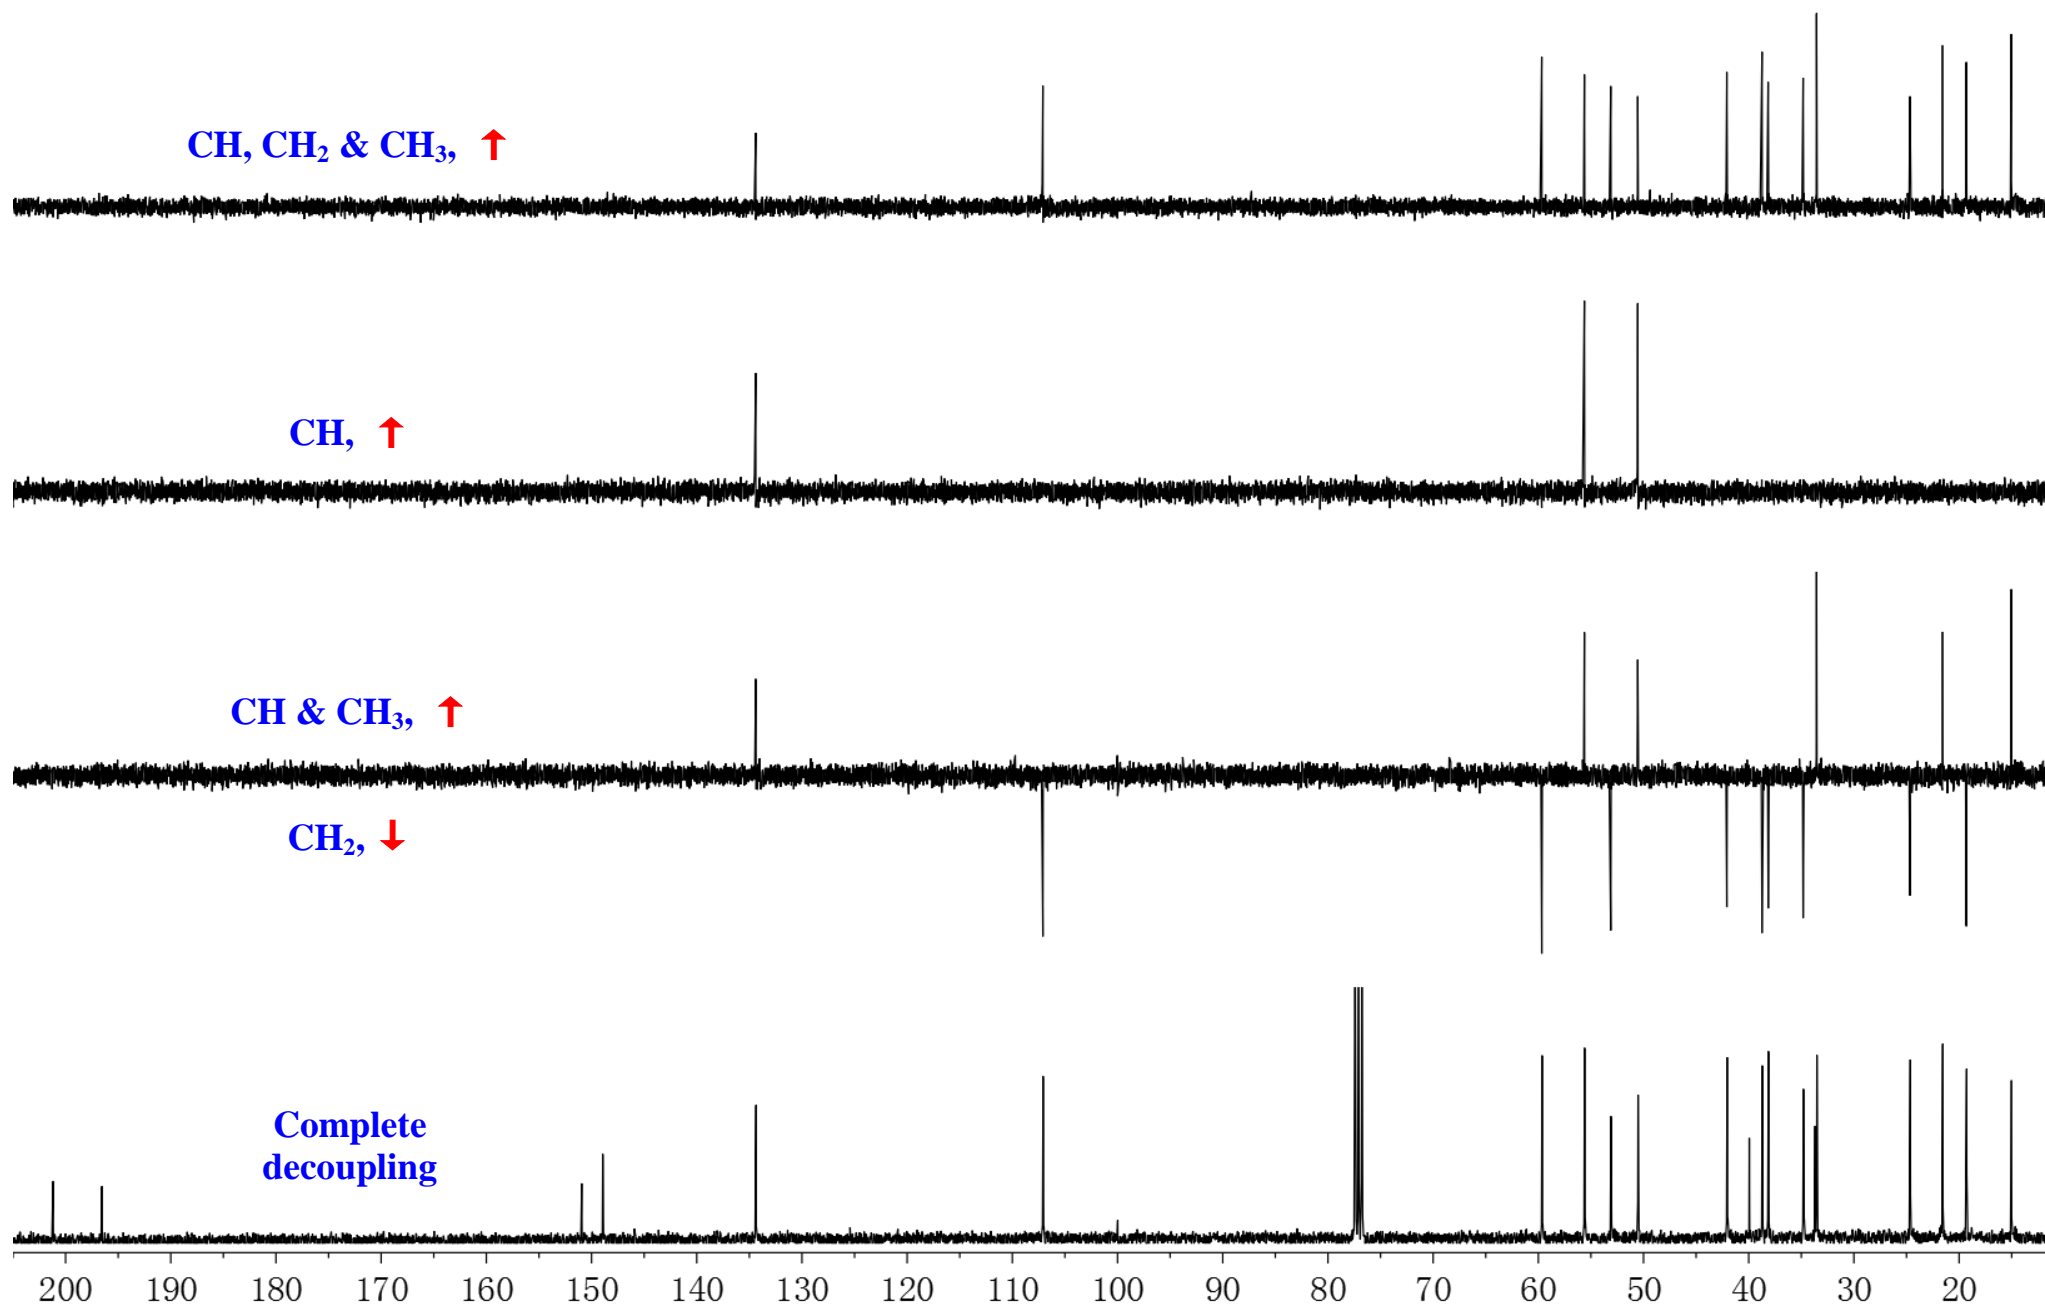

$^1\text{H}$ - $^1\text{H}$  COSY Spectrum of **2** in  $\text{CDCl}_3$

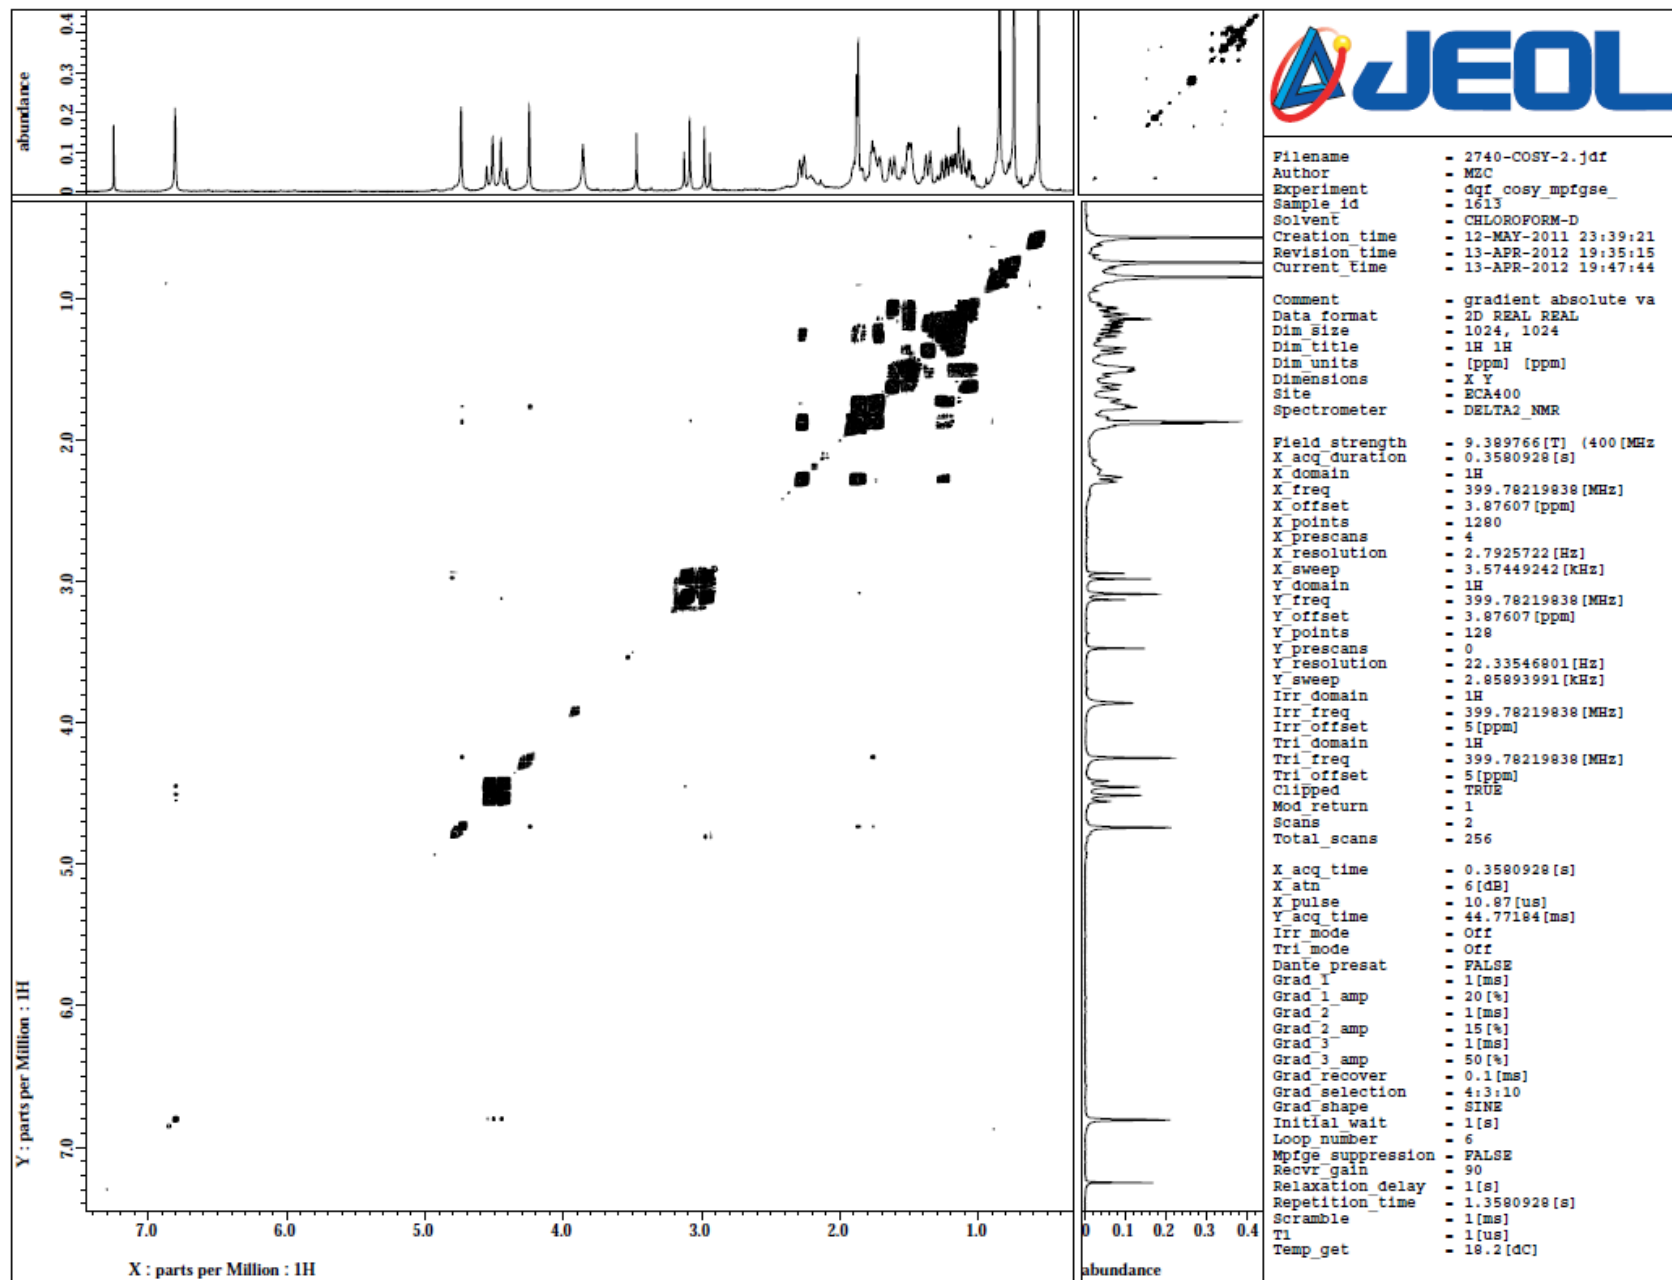

# Expanded $^1\text{H}$ - $^1\text{H}$ COSY Spectrum of **2** in $\text{CDCl}_3$

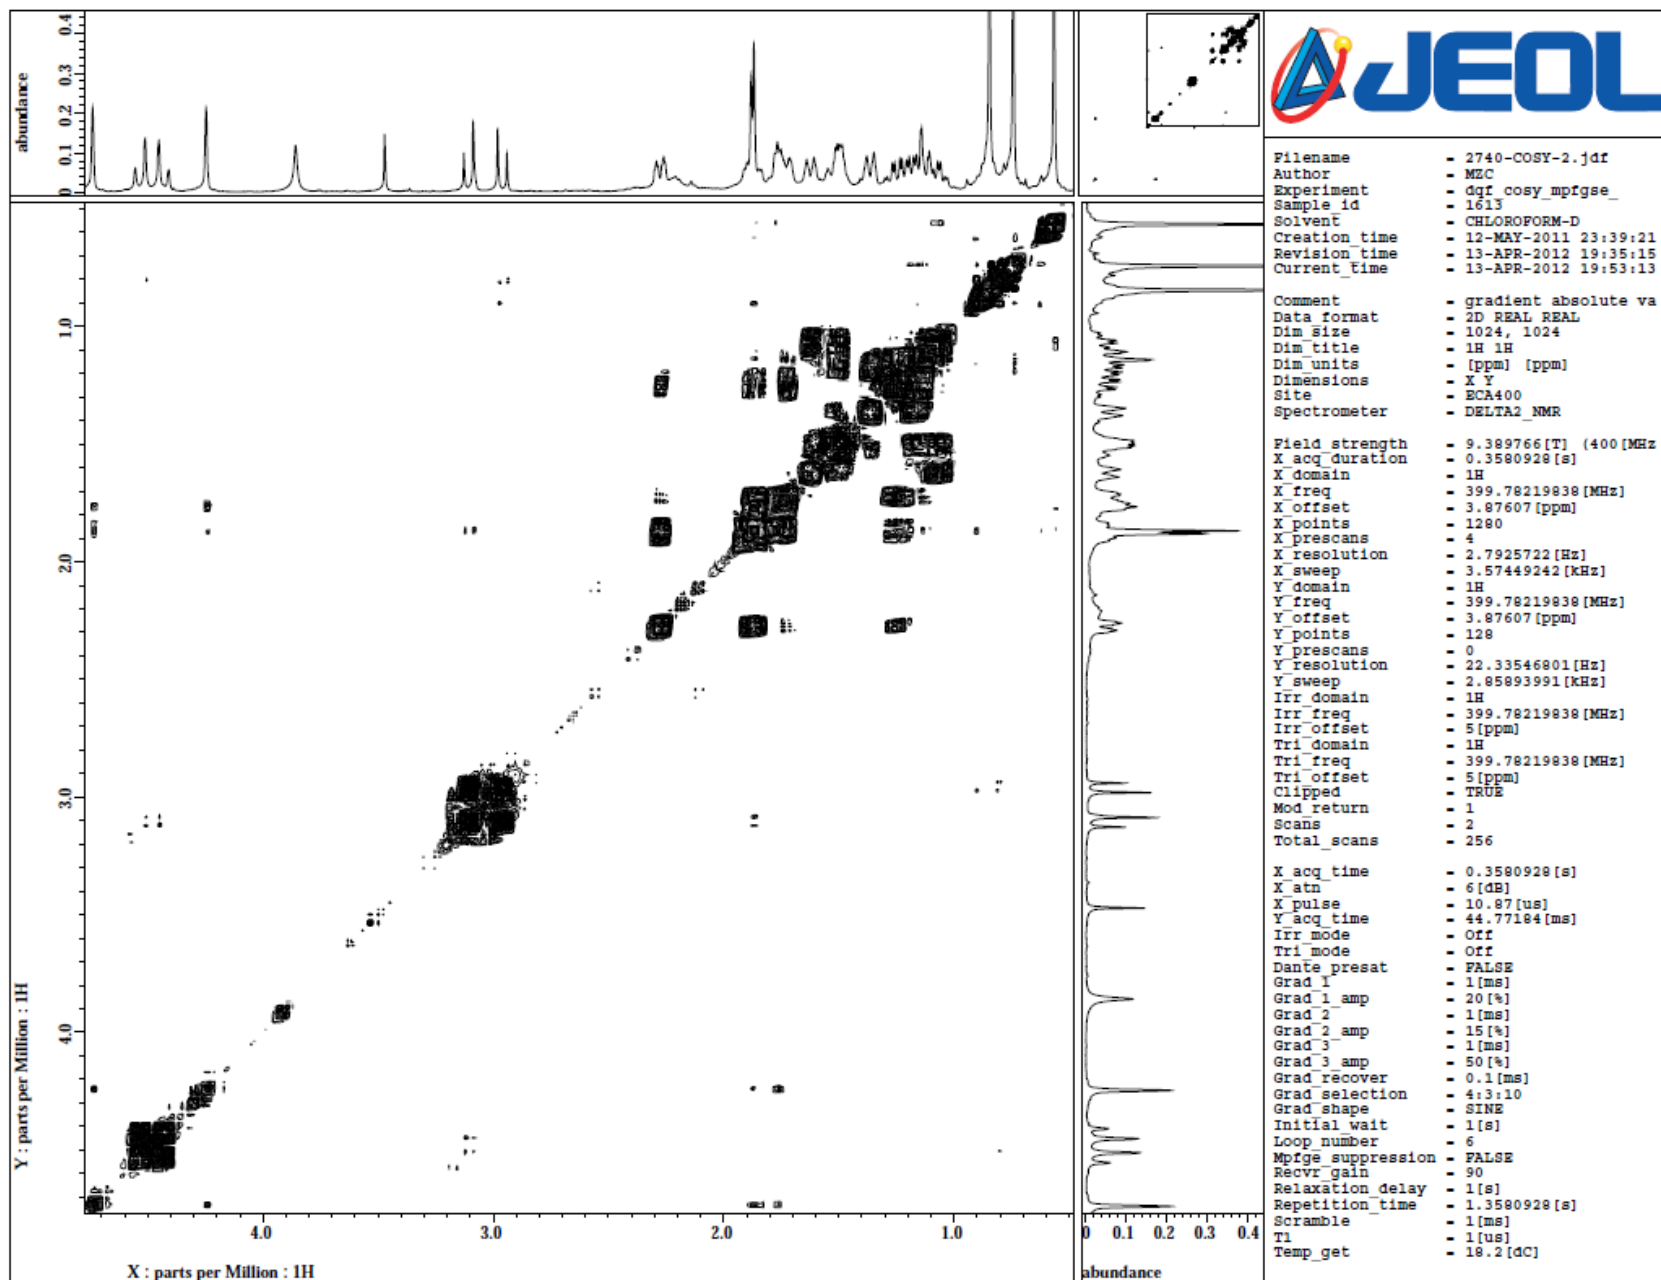

# Expanded $^1\text{H}$ - $^1\text{H}$ COSY Spectrum of **2** in $\text{CDCl}_3$

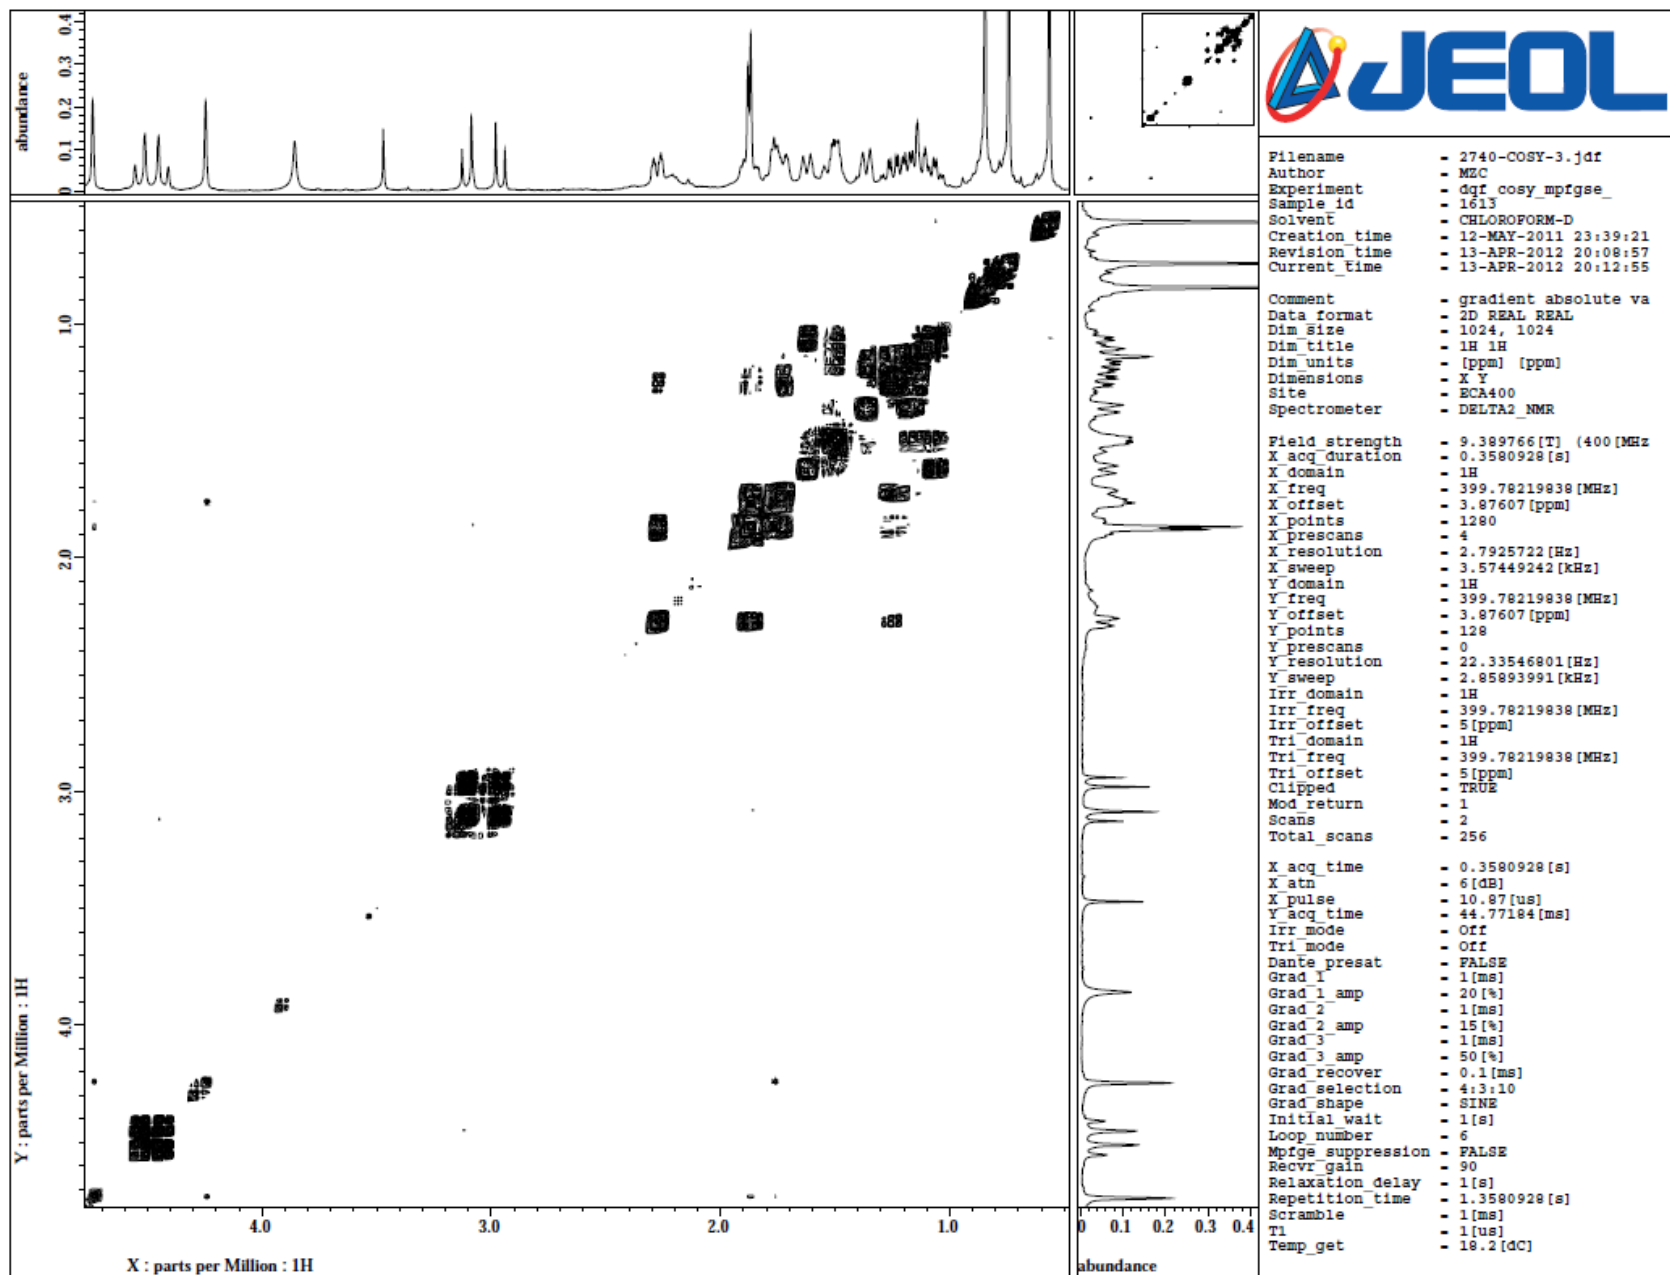

# Expanded $^1\text{H}$ - $^1\text{H}$ COSY Spectrum of **2** in $\text{CDCl}_3$

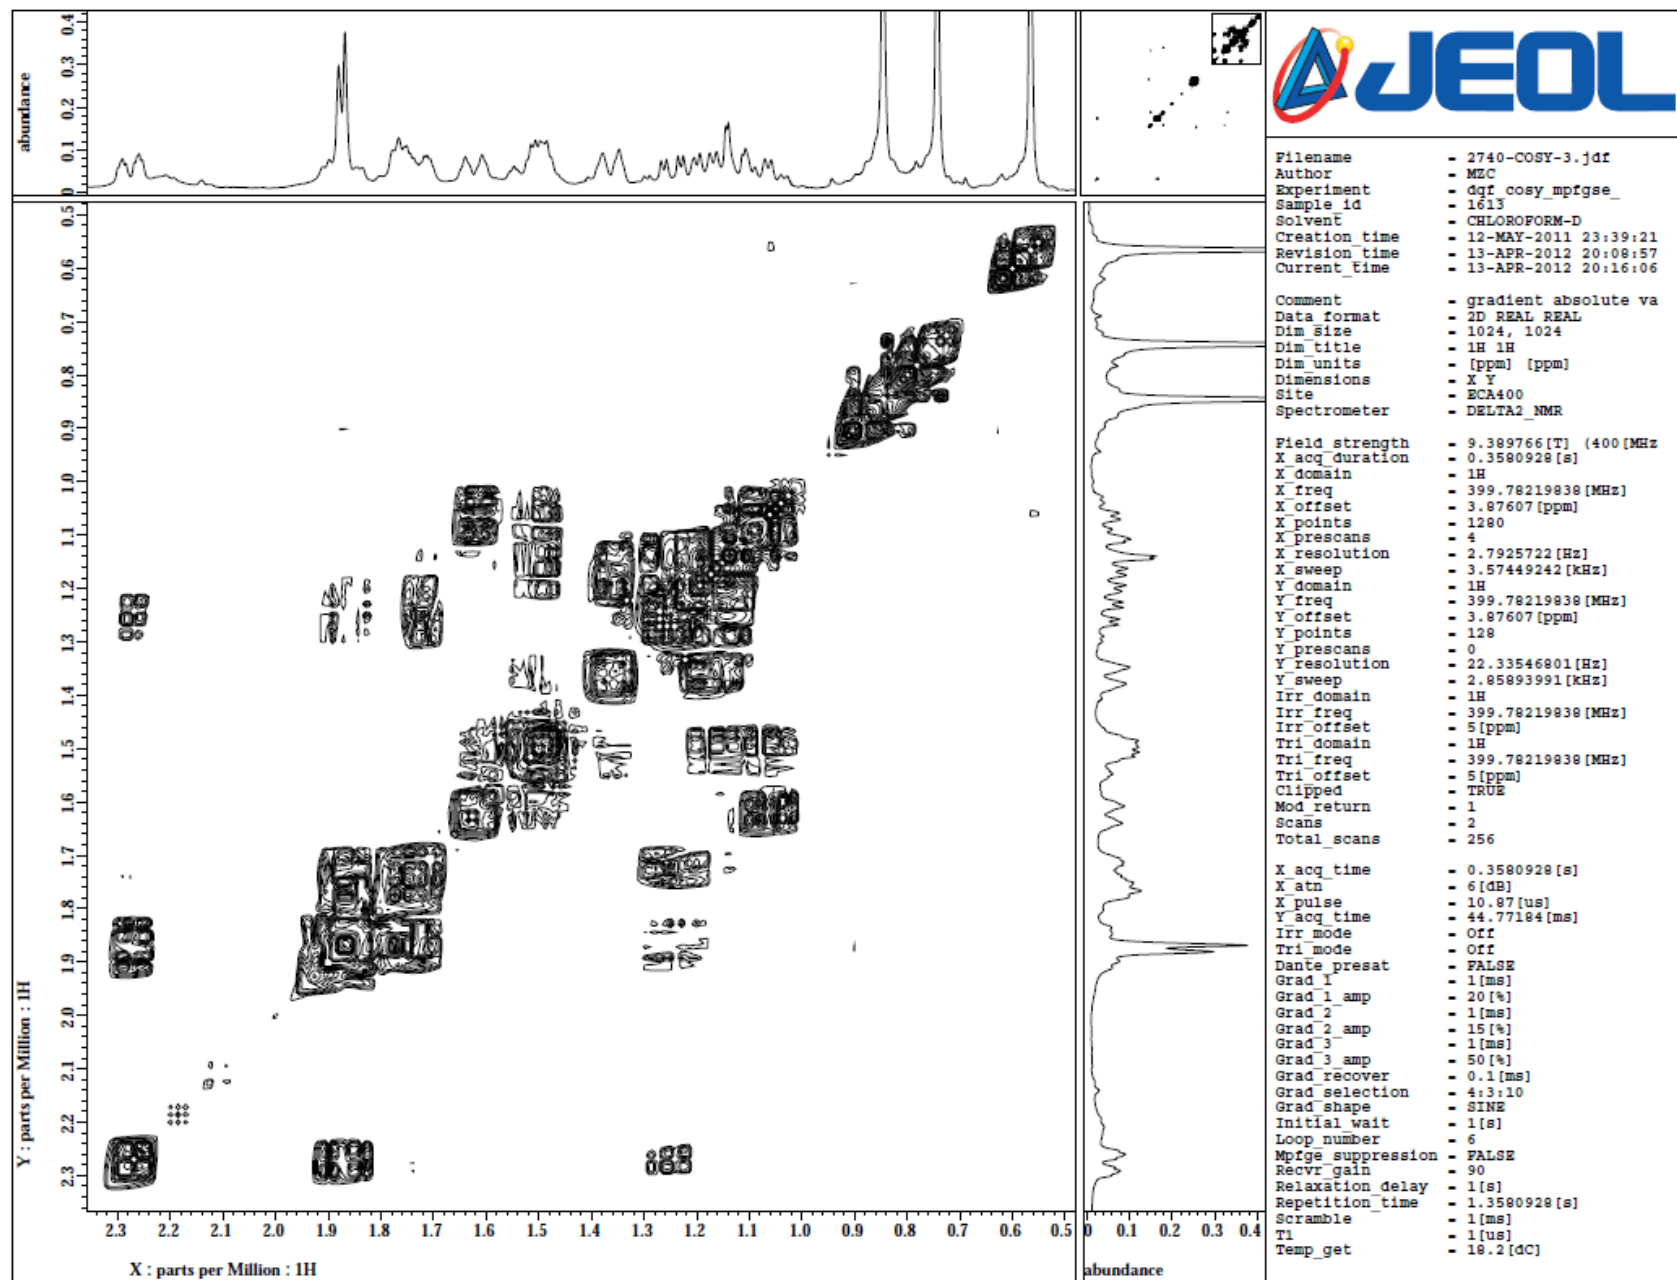

HMQC Spectrum of **2** in CDCl<sub>3</sub>

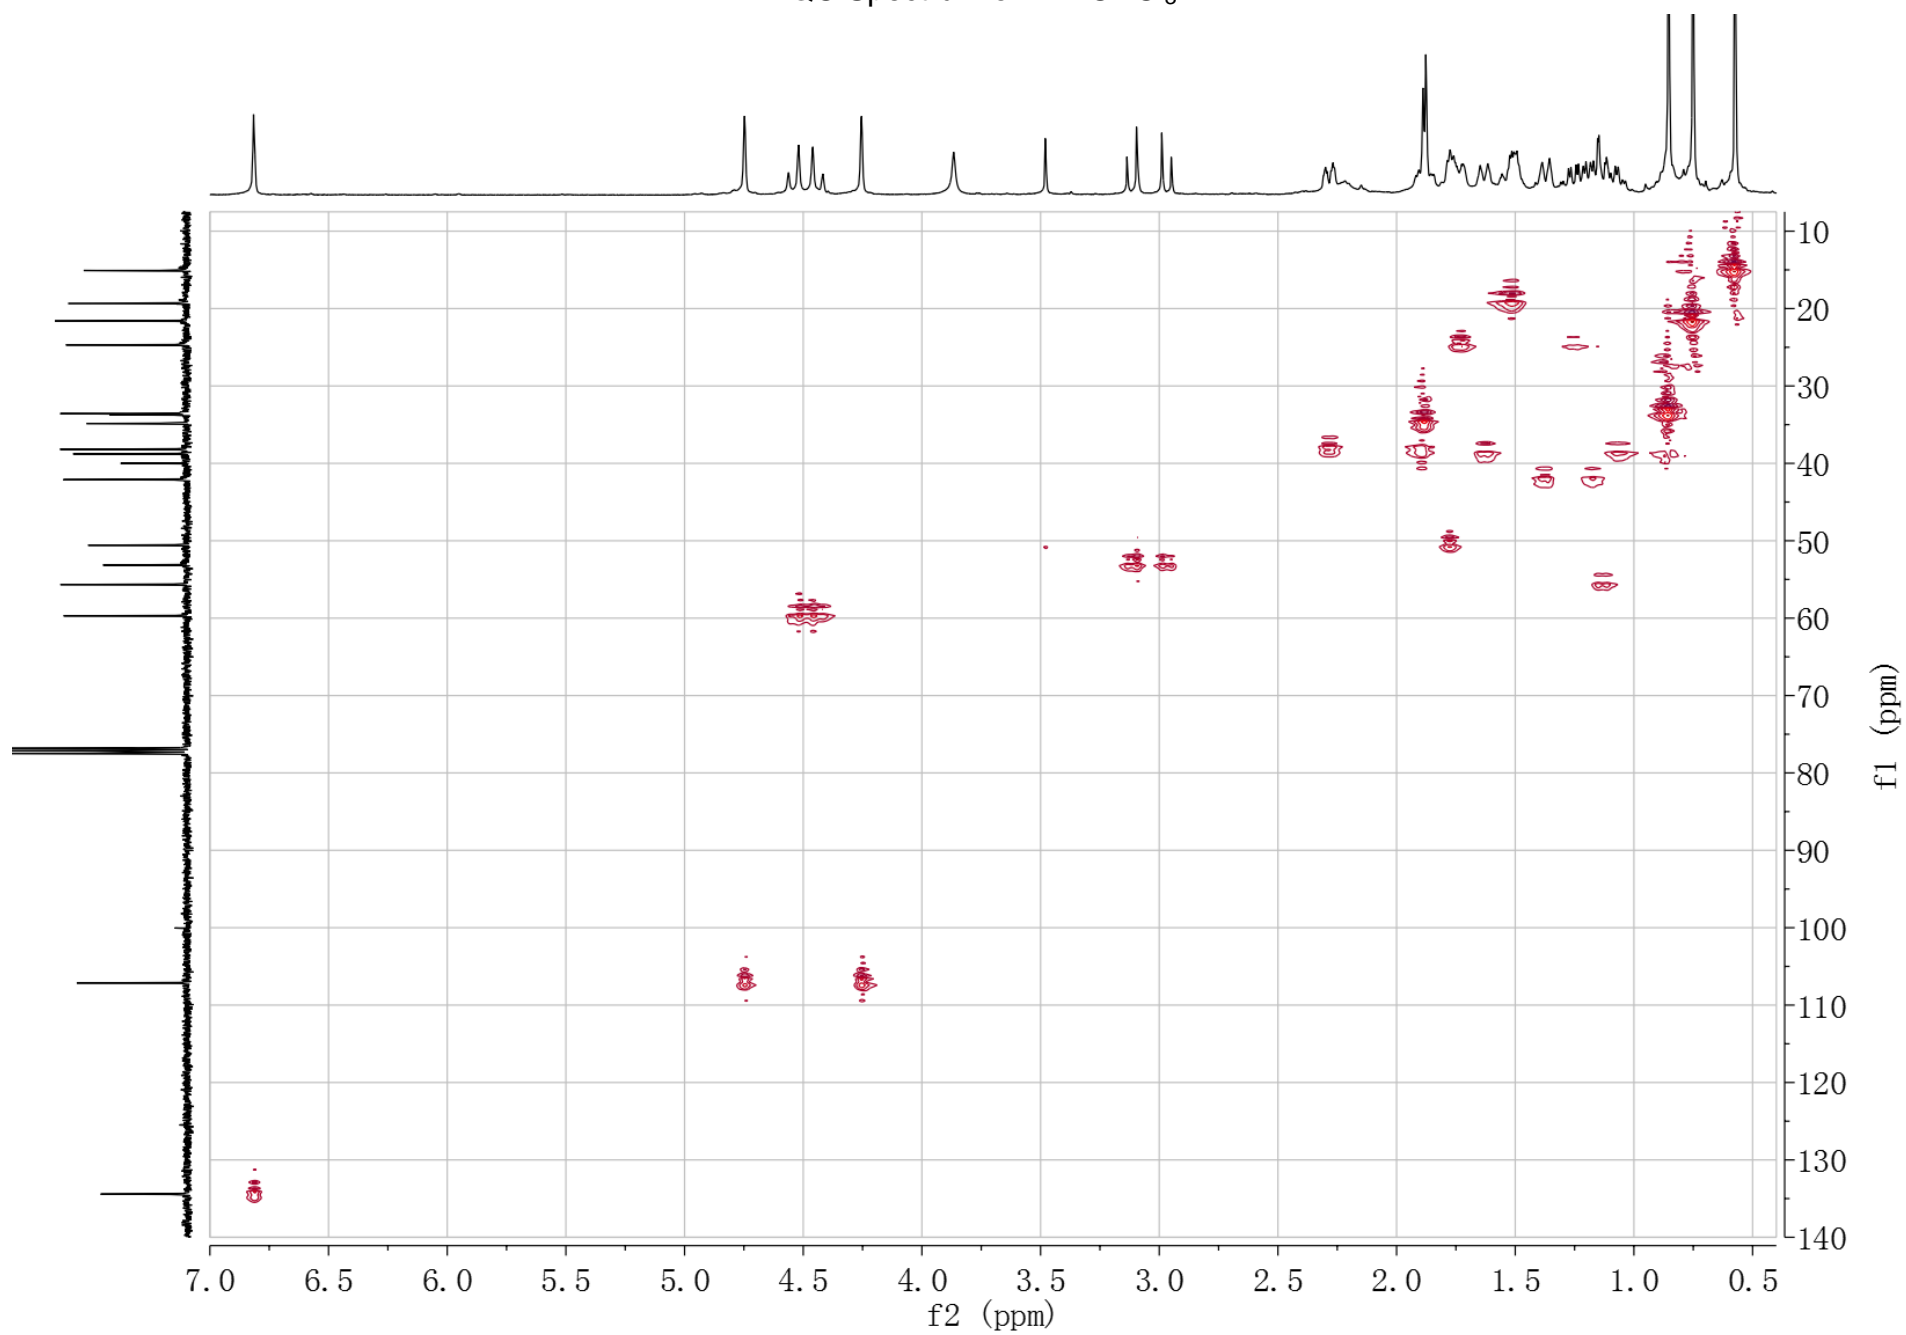

Expanded HMQC Spectrum of **2** in CDCl<sub>3</sub>

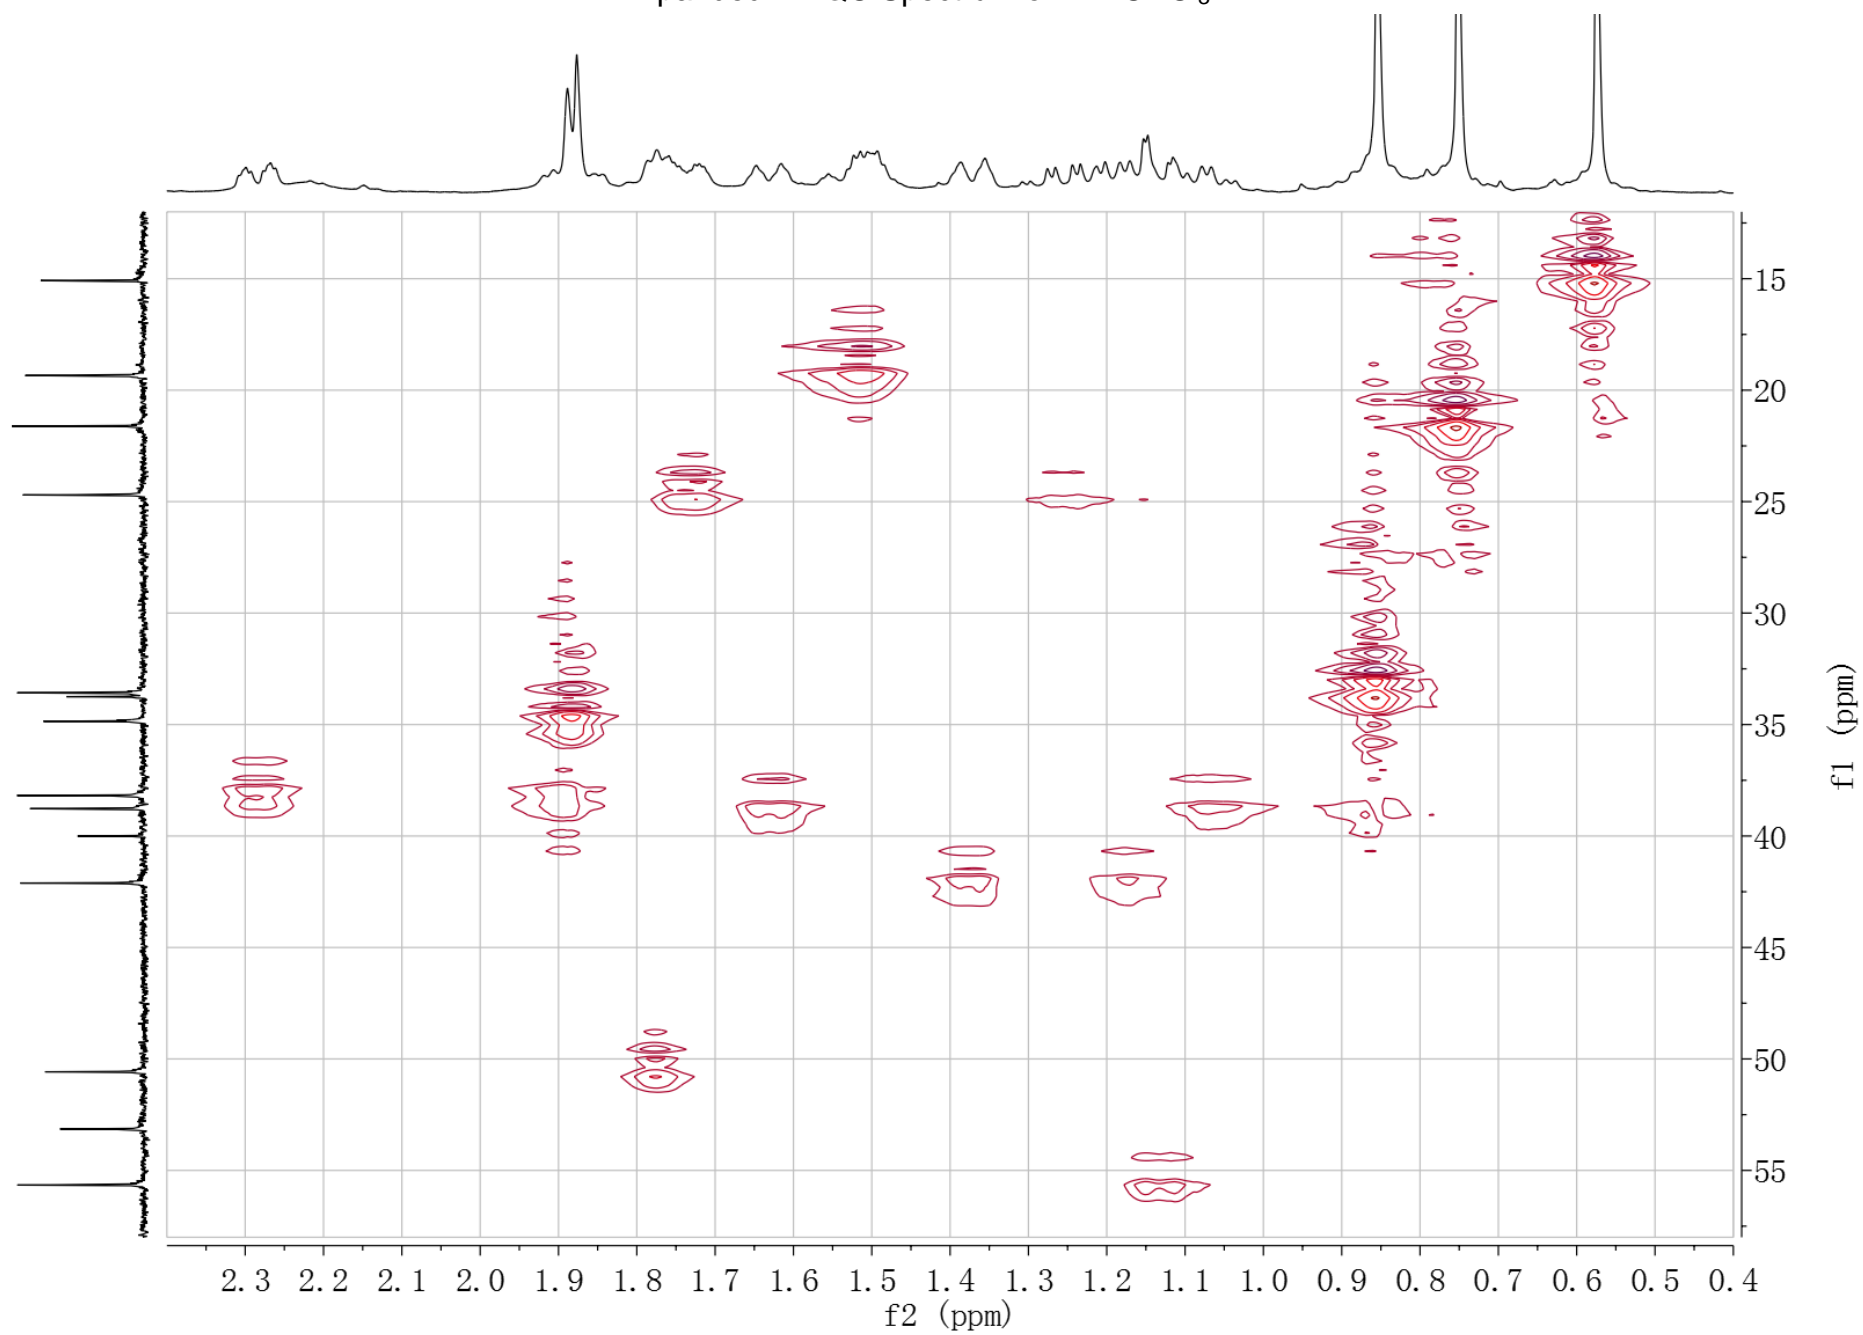

HMBC Spectrum of **2** in CDCl<sub>3</sub>

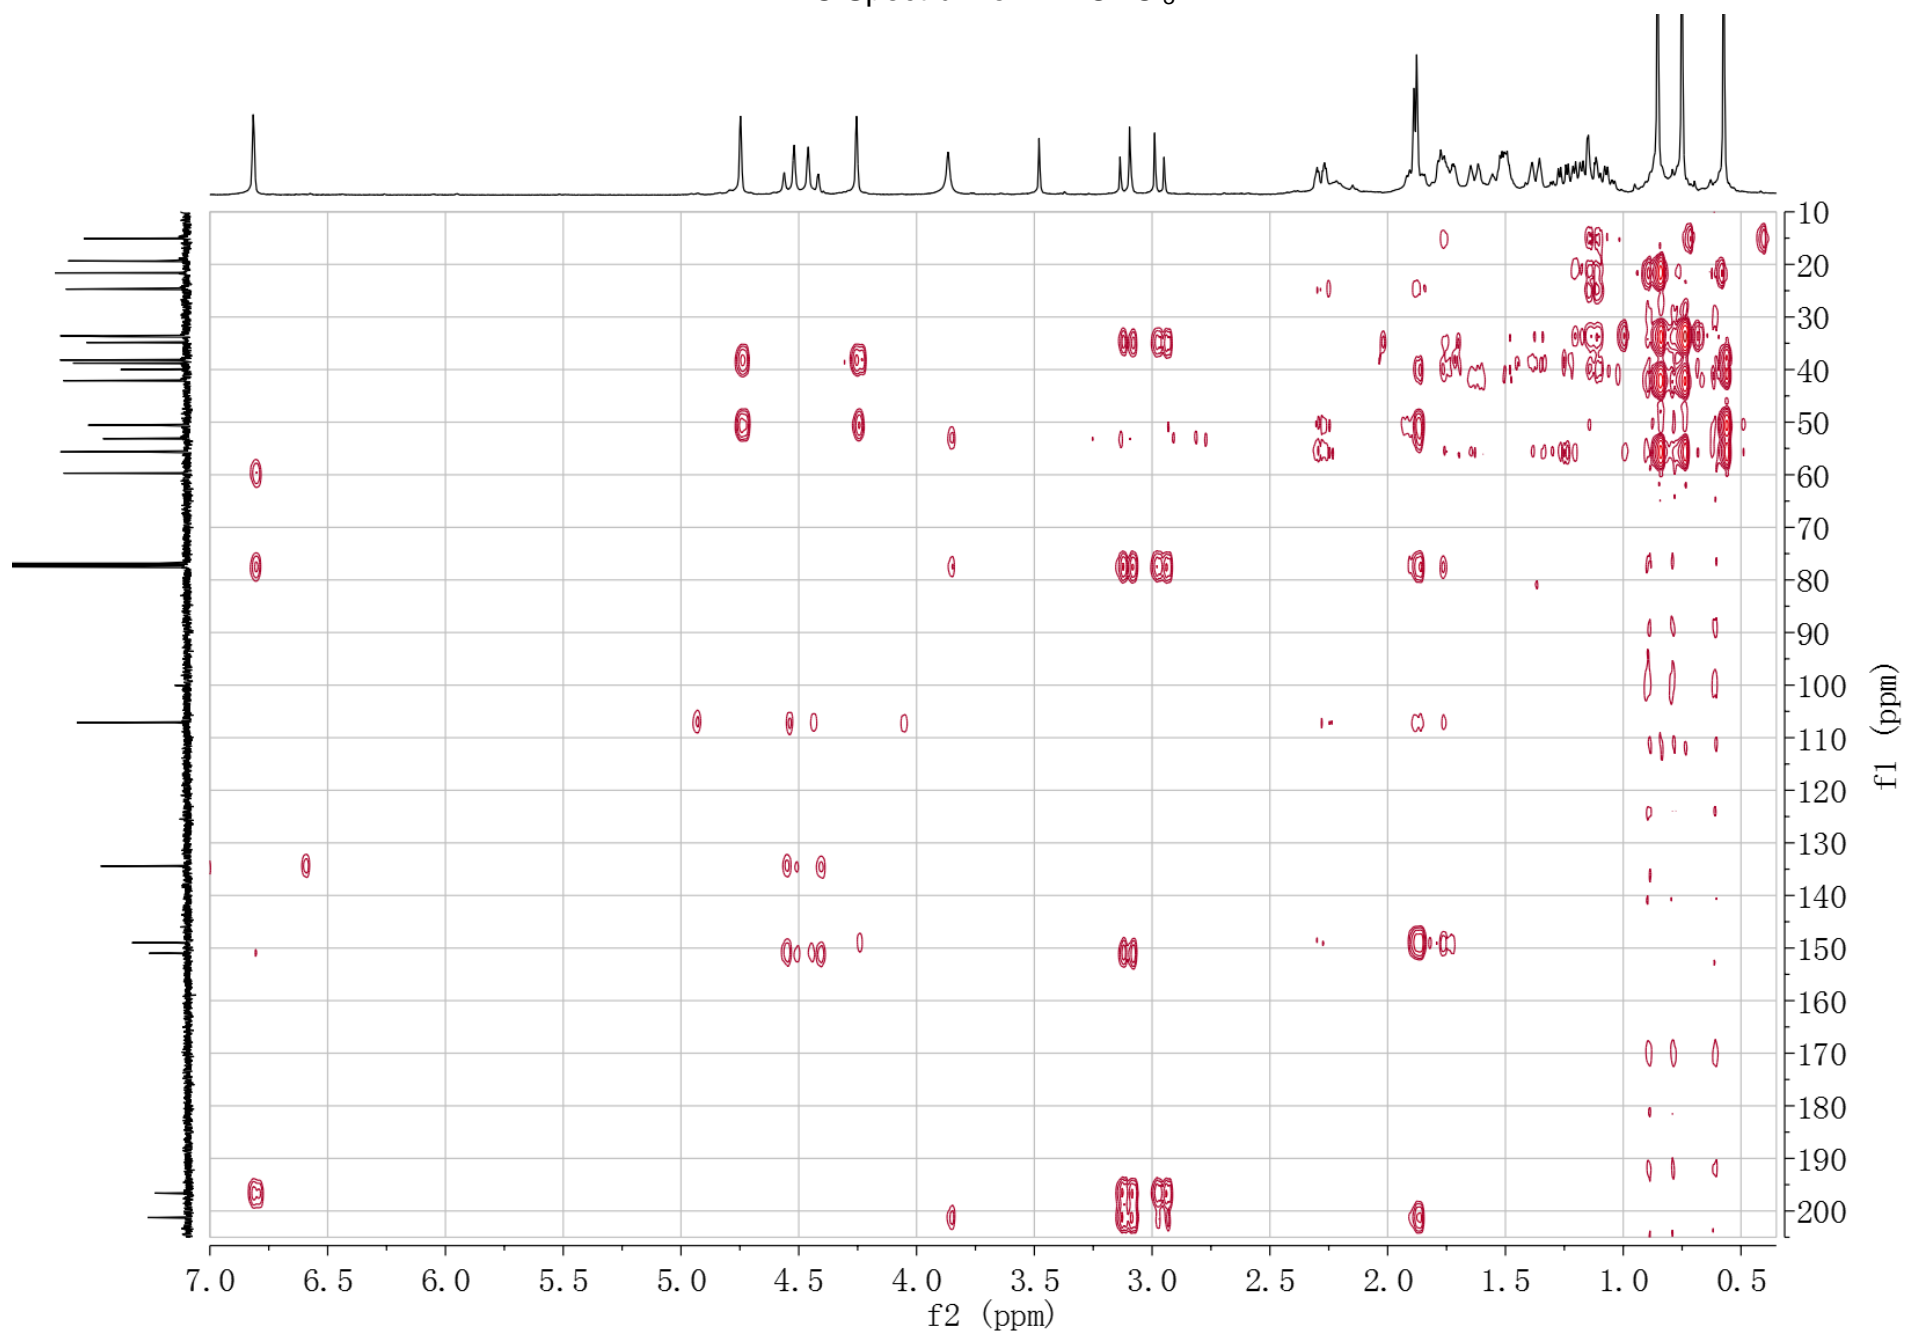



Expanded HMBC Spectrum of **2** in CDCl<sub>3</sub>

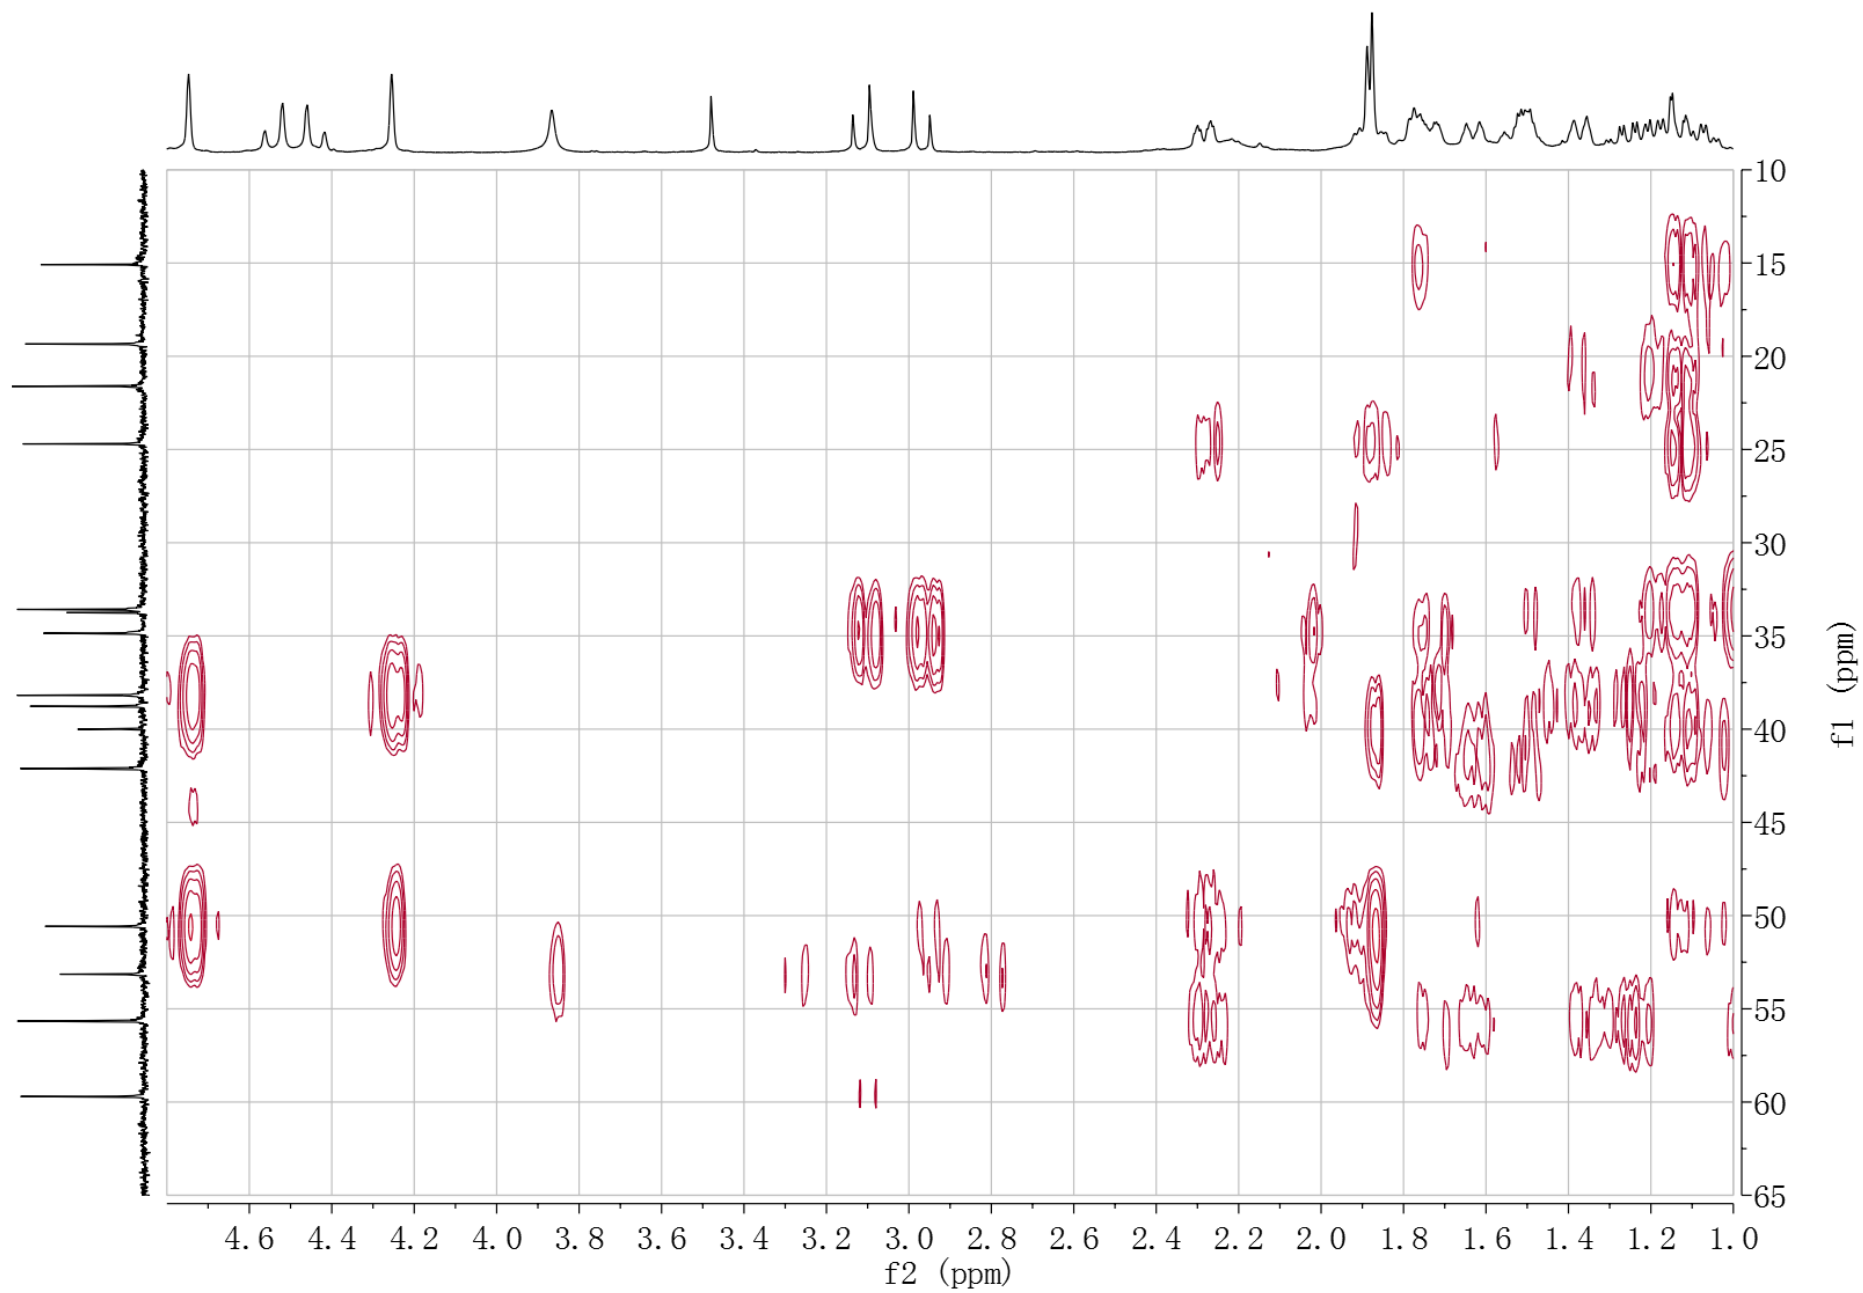

Expanded HMBC Spectrum of **2** in CDCl<sub>3</sub>

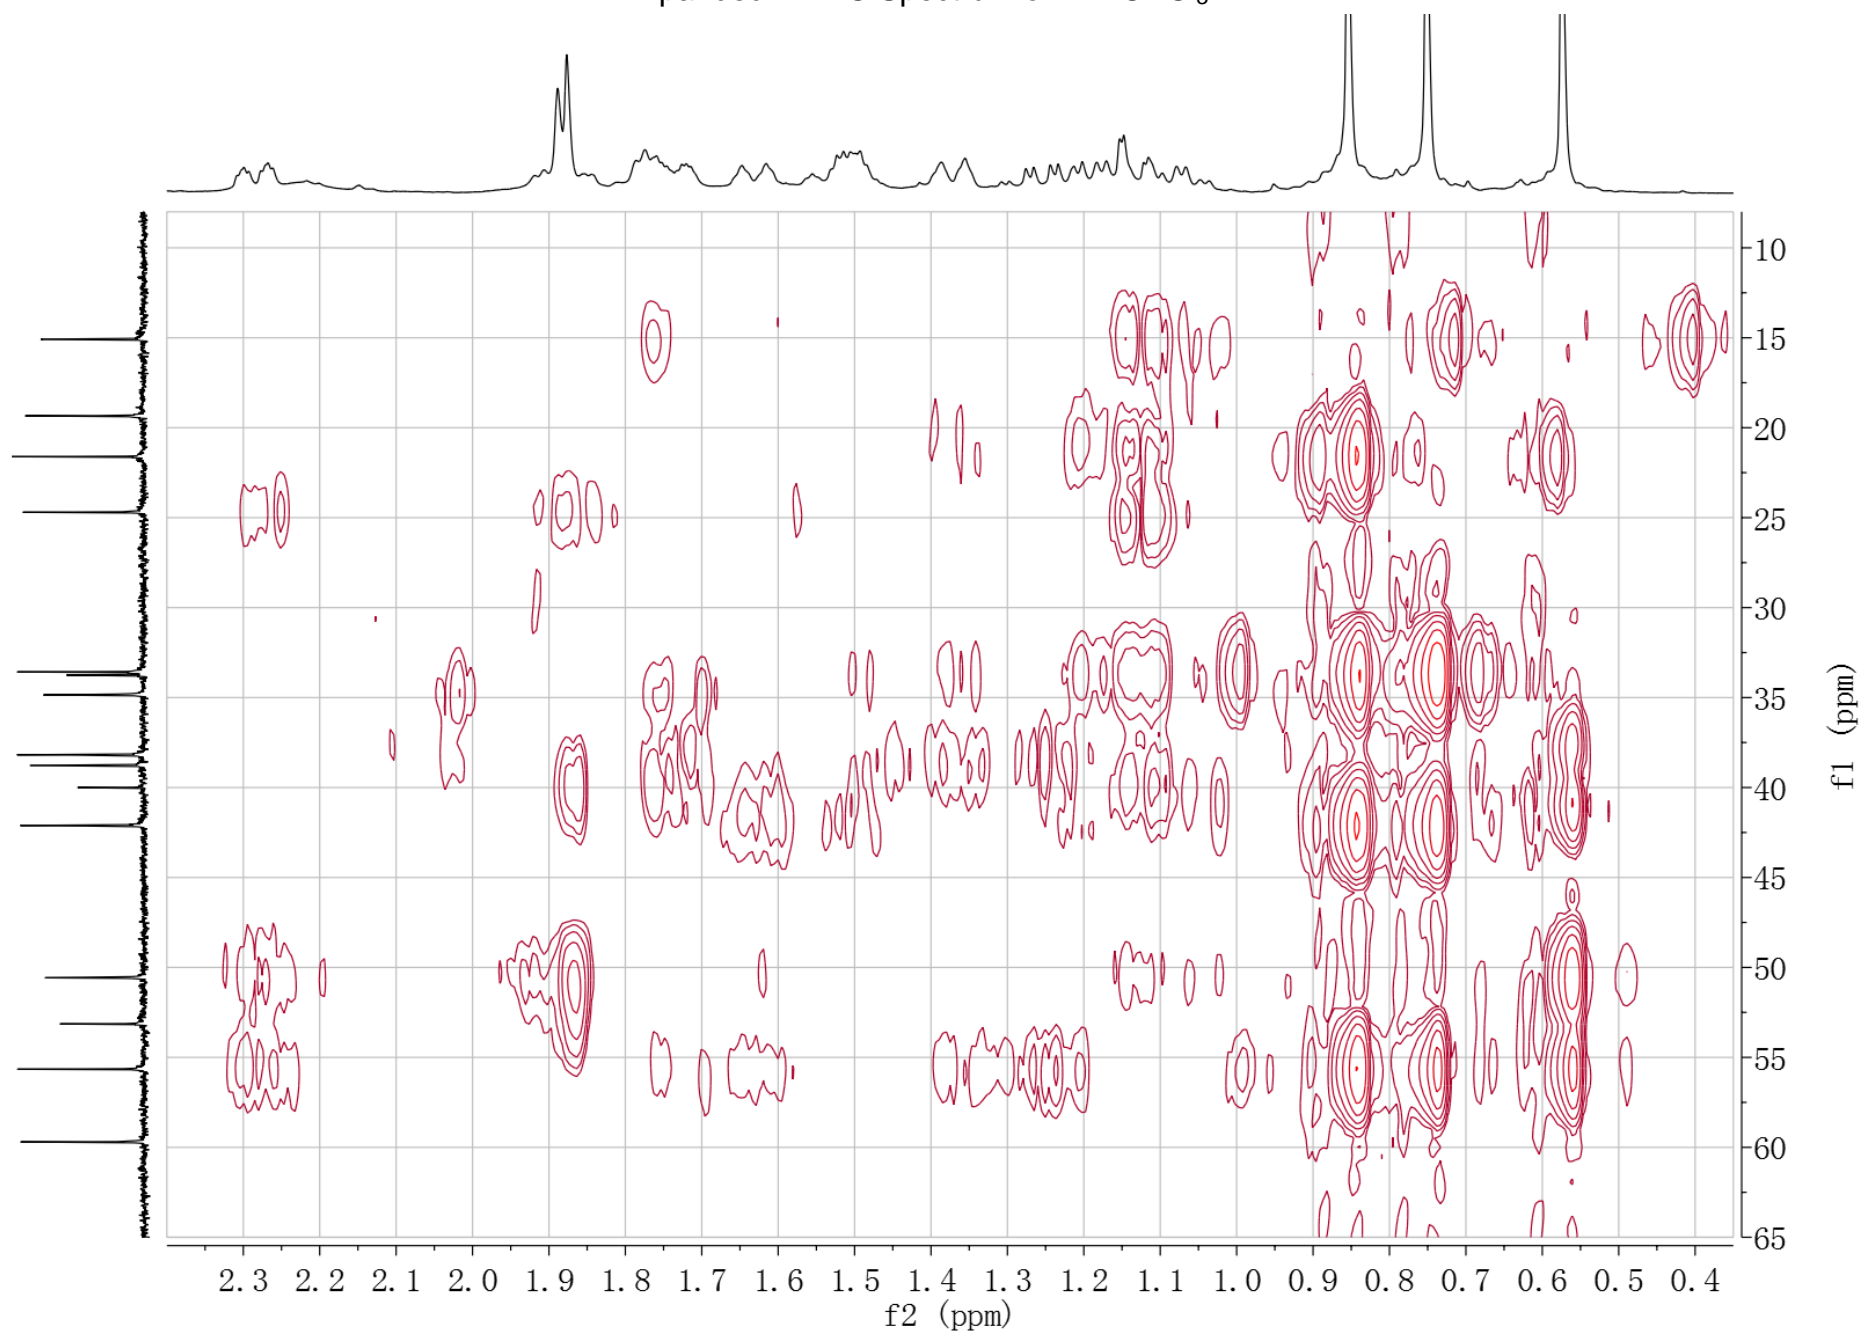

# NOESY Spectrum of **2** in CDCl<sub>3</sub>

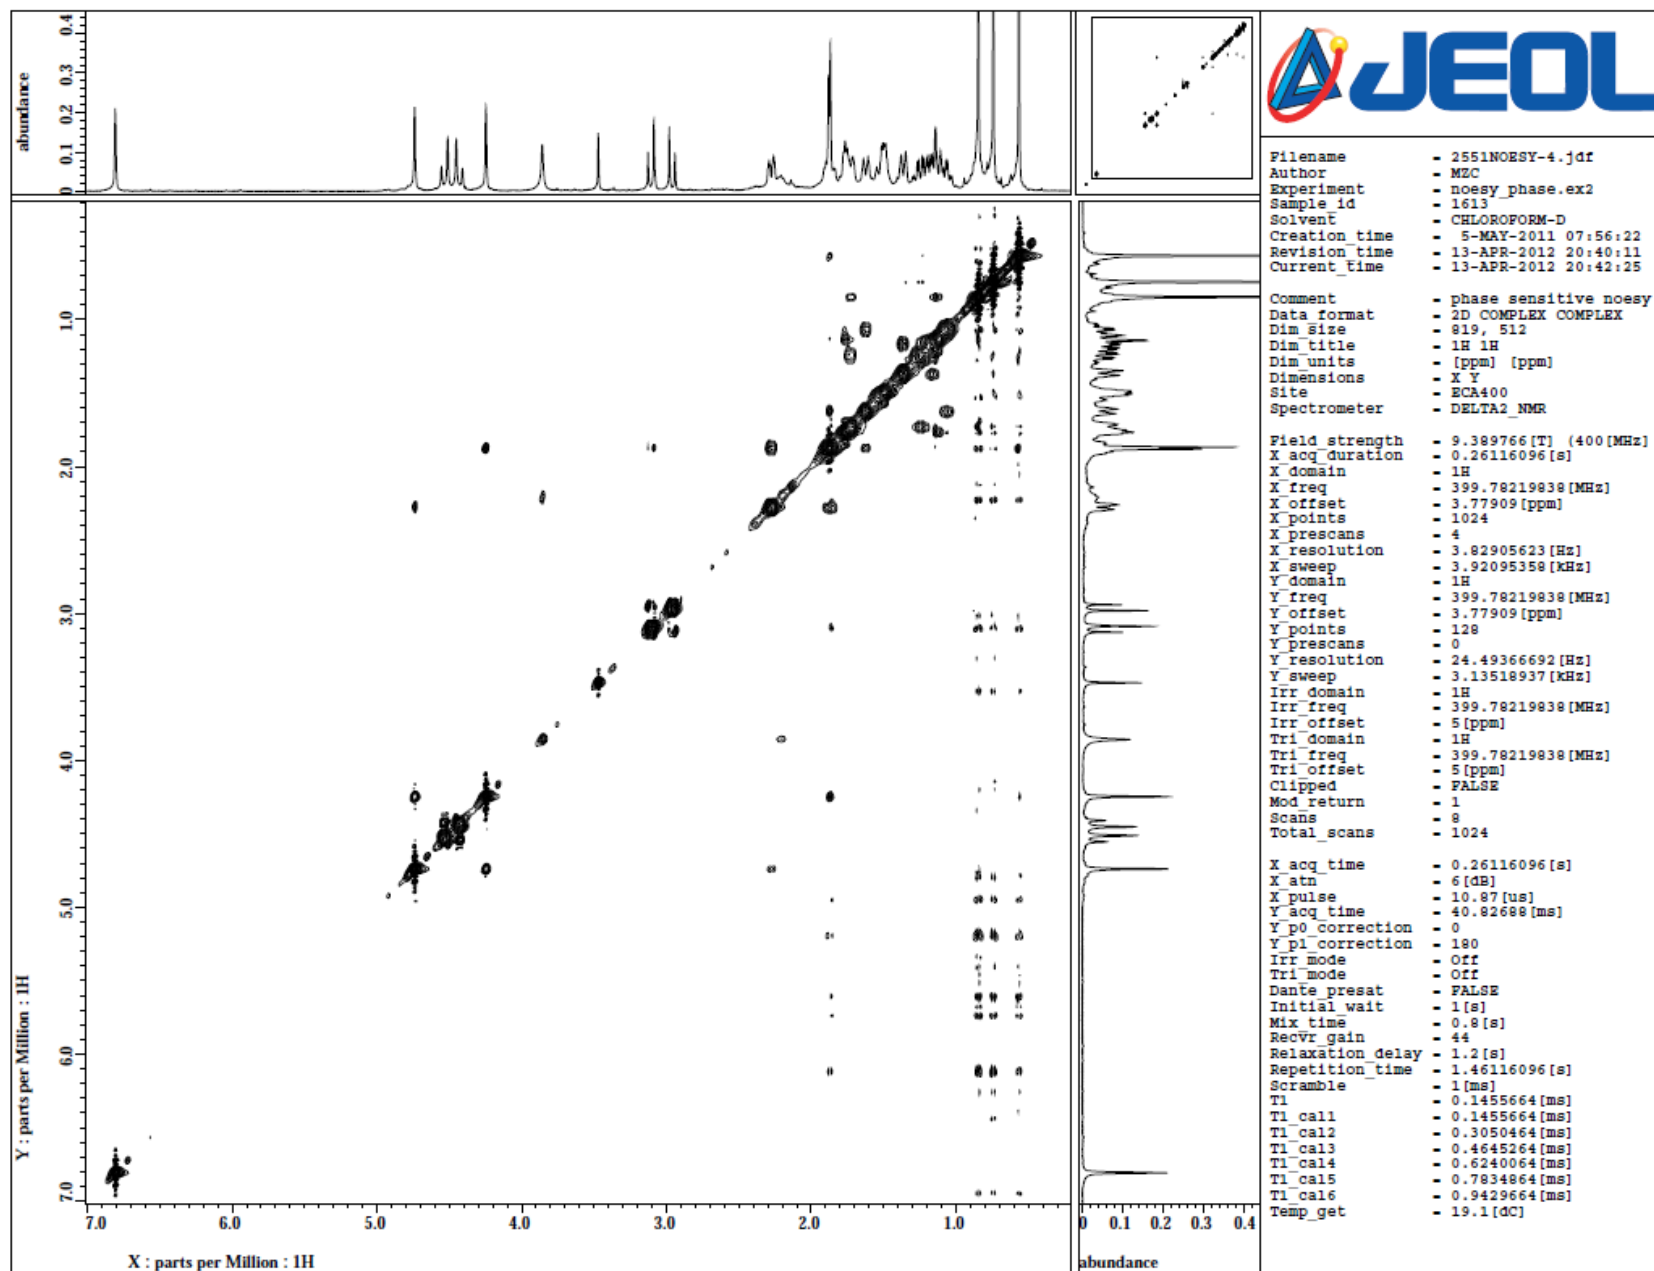

# Expanded NOESY Spectrum of **2** in CDCl<sub>3</sub>

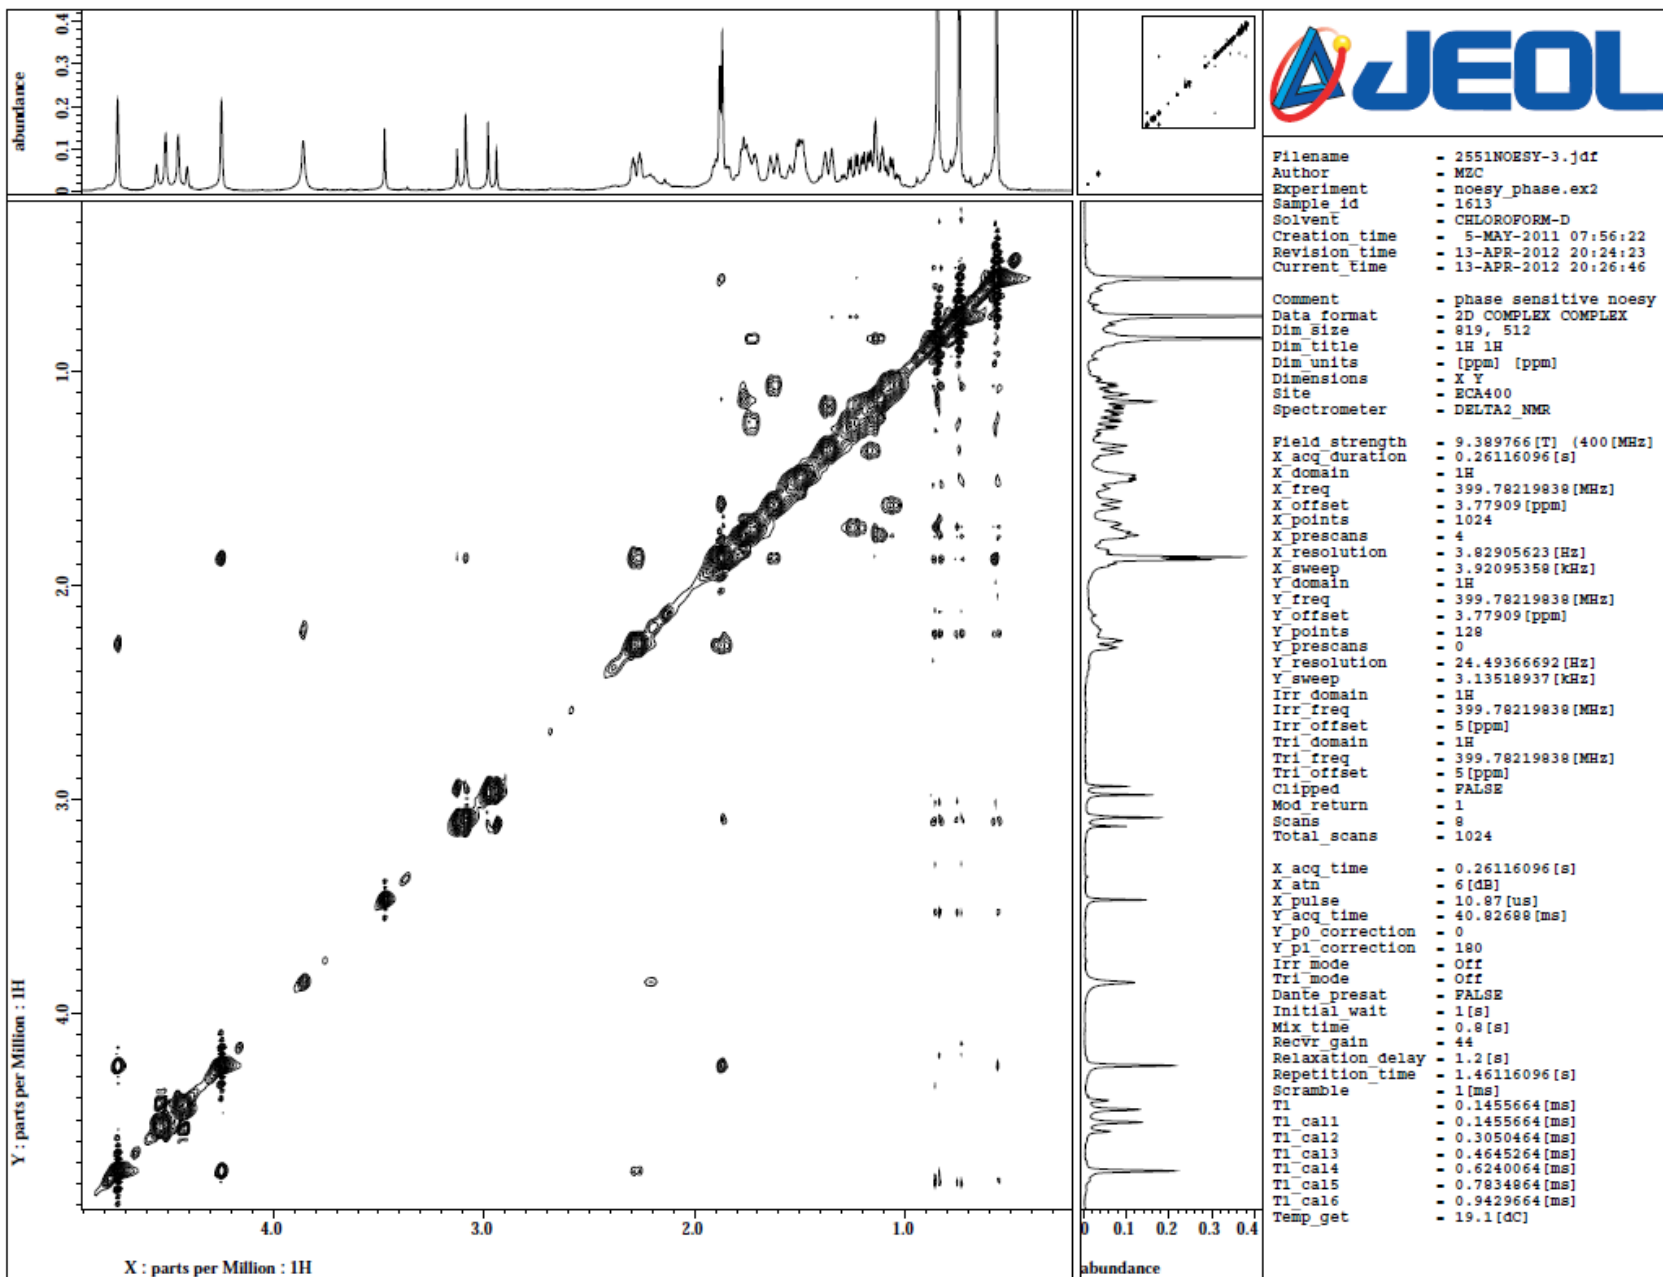

# Expanded NOESY Spectrum of **2** in CDCl<sub>3</sub>

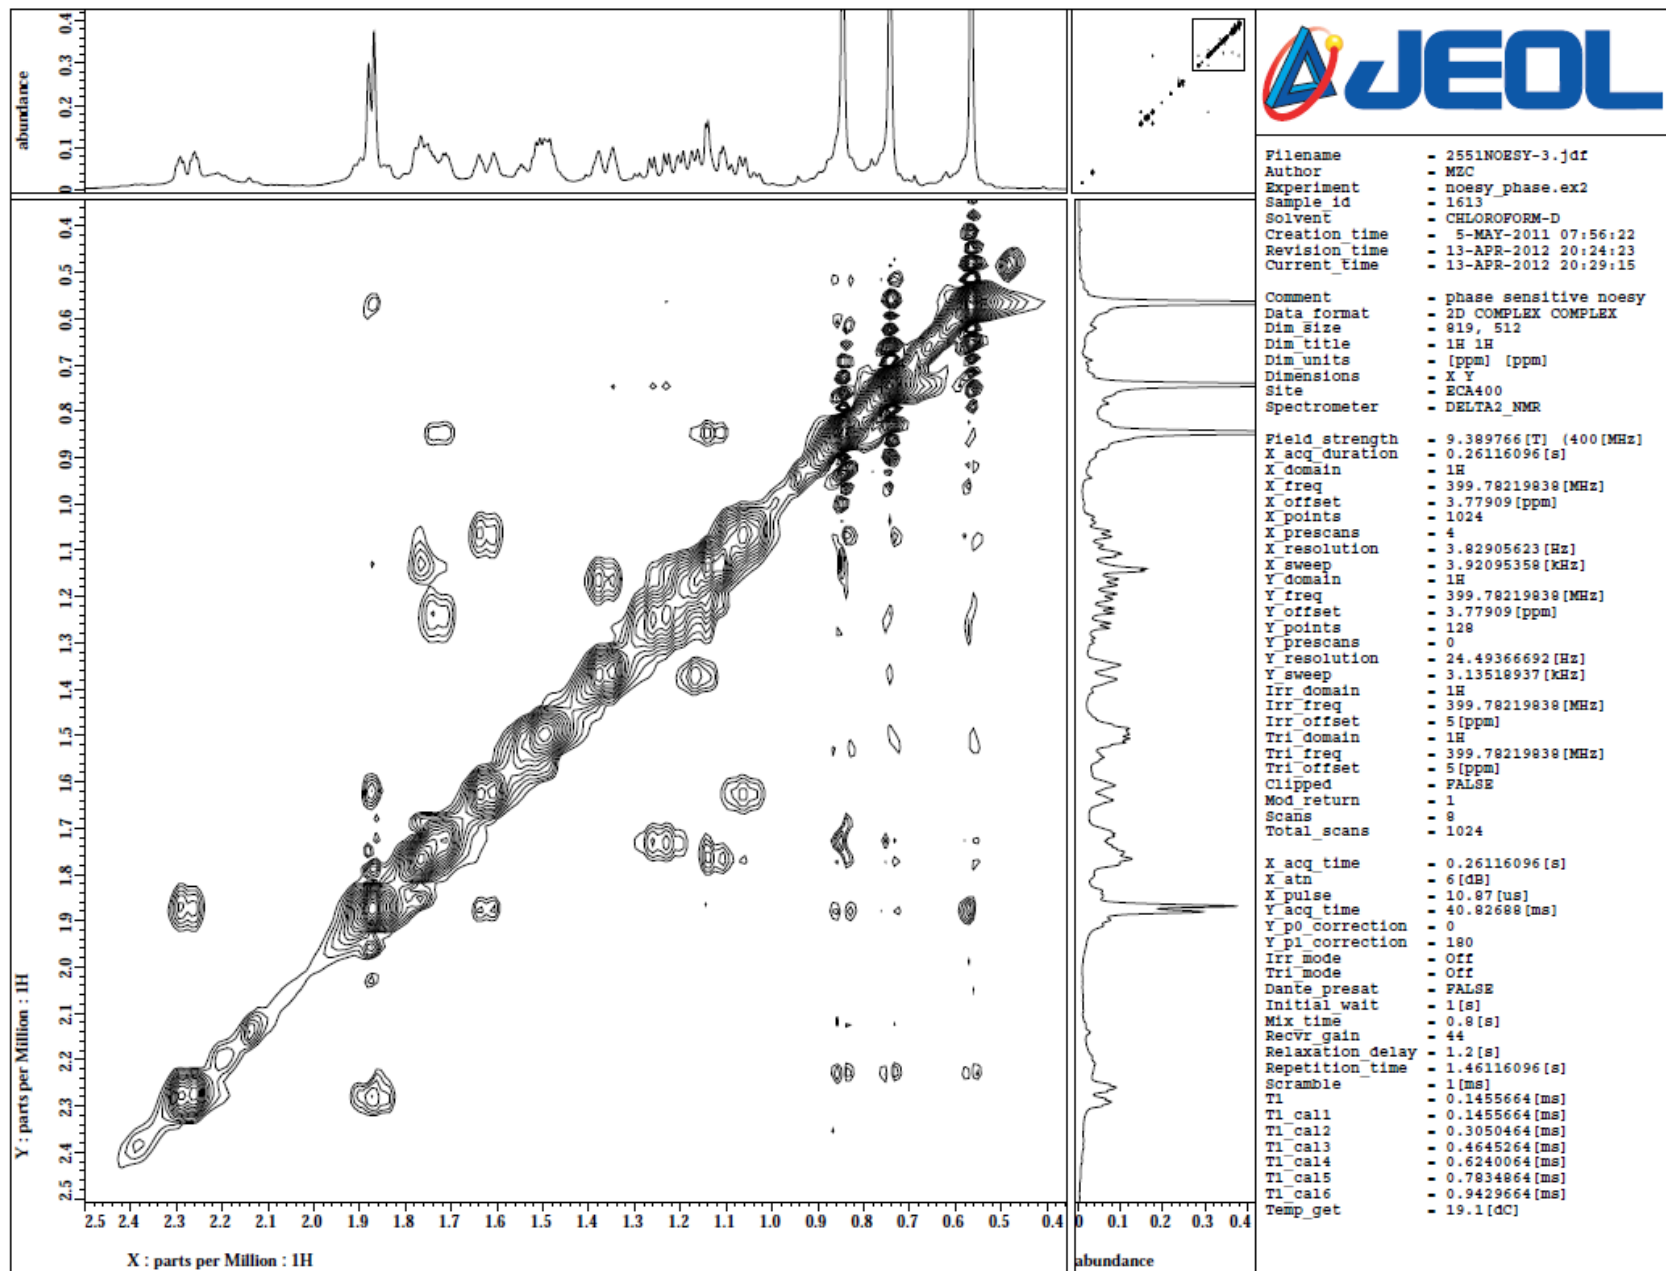

Supplement: s1 [file s1]
