# Supplementary material for: Purpurogemutantin and Purpurogemutantidin, New Drimenyl Cyclohexenone Derivatives Produced by a Mutant Obtained by Diethyl Sulfate Mutagenesis of a Marine-Derived Penicillium purpurogenum G59
Source: Mar Drugs. 2012 Jun 4;10(6):1266–87. doi: 10.3390/md10061266 (PMC3397438; doi:10.3390/md10061266)
Supplement: Supplementary File 1: — ZIP-Document (ZIP, 8582 KB) [file marinedrugs-10-01266-s001.zip]

Archive with 5 entries (5 files):
- Supplementary Data S1_MS, UV, IR and NMR spectra of 1.pdf
- Supplementary Data S2_CD and ECD spectra of 1 and 2.pdf
- Supplementary Data S3_MS, UV, IR and NMR spectra of 2.pdf
- Supplementary Data S4_HPLC analysis for 1¿C3.pdf
- Supplementary Data S5_LC-MS data for detcting 1-3.pdf
